# Supplementary material for: Increased Reactive Oxygen Species Production and Lower Abundance of Complex I Subunits and Carnitine Palmitoyltransferase 1B Protein Despite Normal Mitochondrial Respiration in Insulin-Resistant Human Skeletal Muscle
Source: Oxford University Press journal article supplement (doi:10.2337/db10-0174), 2010-08-03
Supplement: db100174onlineappendix2.xls [file db100174onlineappendix2.xls]

## Sheet: SpecialProteinReport
Supplemental Table 2.
Proteins assigned to one or more skeletal muscle mitochondrial preparations from lean, insulin sensitive and obese, insulin resistant individuals along with protein identifiers, Gene name and Gene Ontology annotations.
Protein name	Gene name	IPI ID	ENSEMBL ID	REFSEQ ID	SWISSPROT ID	Peptide sequence	# amino acids	Molecular Mass	Mean Sequence Coverage	Isoelectric point (pI)	# Unique Peptides	GO Annotations	Spectrum Count for LN_1	Spectrum Count for LN_2	Spectrum Count for LN_3	Spectrum Count for LN_4	Spectrum Count for LN_5	Spectrum Count for LN_6	Spectrum Count for LN_7	Spectrum Count for LN_8	Spectrum Count for OB_1	Spectrum Count for OB_2	Spectrum Count for OB_3	Spectrum Count for OB_4	Spectrum Count for OB_5	Spectrum Count for OB_6	Spectrum Count for OB_7	Spectrum Count for OB_8
Cytosolic 5'-nucleotidase 1A,	NT5C1A,	IPI00000146,	ENSP00000235628,	NP_115915,	Q9BXI3,	EAIDEGIAAATIFSPSR, LINSINHYDLFIER, VAFDGDAVLFSDESER	368	41020.145,	0.127717	6.52092	3	166,287,5737,5829,8253,9116,9117,16787,												3	2
Histidine triad nucleotide-binding protein 2,	HINT2,	IPI00000335,	ENSP00000259667,	NP_115982,	Q9BX68,	AQQATPGGAAPTIFSR, DVAPQAPVHFLVIPK, ISQAEEEDQQLLGHLLLVAK, LGAQSVYHLHIHVLGGR	163	17161.64,	0.417178	9.6077	4	5739,16787,	47	44	21	35	56	14	31	19	33	46	13	30	28	10	17	31
Isoform 1 of Apoptosis-inducing factor 1, mitochondrial precursor,Isoform 3 of Apoptosis-inducing factor 1, mitochondrial precursor,	AIFM1,	IPI00000690,IPI00157908,	ENSP00000287295,ENSP00000315122,	NP_004199,NP_665811,	O95831-1,O95831-3,	AALSASEGEEVPQDK, ALGTEVIQLFPEK, APSHVPFLLIGGGTAAFAAAR, DGEQHEDLNEVAK, ELWFSDDPNVTK, IIKDGEQHEDLNEVAK, ILPEYLSNWTMEK, ISGLGLTPEQK, KAALSASEGEEVPQDK, KVETDHIVAAVGLEPNVELAK, LAGENMTGAAK, LNDGSQITYEK, SIYFQPPSFYVSAQDLPHIENGGVAVLTGK, TGGLEIDSDFGGFR, VETDHIVAAVGLEPNVELAK, VLIVSEDPELPYMRPPLSK, VMPNAIVQSVGVSSGK	613, 609	66900.09,66294.23,	0.366616	9.37685	17	3677,5515,5634,5737,5739,6118,6309,6915,8630,9055,45454,50660,	41	58	83	65	71	29	62	41	40	61	18	75	69	36	87	44
Quinone oxidoreductase,	CRYZ,	IPI00000792,	ENSP00000339399,	NP_001880,	Q08257,	DLSLLSHGGR, ESSIIGVTLFSSTK, GIDIIIEMLANVNLSK, ILGTAGTEEGQK, IVLQNGAHEVFNHR, KPLLPYTPGSDVAGVIEAVGDNASAFK, KPLLPYTPGSDVAGVIEAVGDNASAFKK, QGAAIGIPYFTAYR, SDIAVPIPK, VAEAHENIIHGSGATGK, VFEFGGPEVLK, VFTSSTISGGYAEYALAADHTVYK, VFTSSTISGGYAEYALAADHTVYKLPEK	329	35206.36,	0.525836	8.69633	13	3960,5737,7601,8270,16491,	5	7	8	6	25	7	33	18	11	20	4	26	17	4	8	25
65 kDa protein,DTNA protein,Isoform 1 of Dystrobrevin alpha,Isoform 2 of Dystrobrevin alpha,Isoform 3 of Dystrobrevin alpha,Isoform 4 of Dystrobrevin alpha,Isoform 5 of Dystrobrevin alpha,Isoform 7 of Dystrobrevin alpha,dystrobrevin alpha isoform 2,dystrobrevin alpha isoform 7,	DTNA,	IPI00000845,IPI00218652,IPI00218653,IPI00218654,IPI00296091,IPI00402365,IPI00644393,IPI00748250,IPI00749235,IPI00793449,	ENSP00000269190,ENSP00000269191,ENSP00000283365,ENSP00000322519,ENSP00000336682,	NP_001381,NP_001382,NP_001383,NP_116757,NP_116760,NP_116761,	Q9Y4J8-1,Q9Y4J8-2,Q9Y4J8-3,Q9Y4J8-4,Q9Y4J8-5,Q9Y4J8-7,	ENALNNLDPNTELNVSR, LEAVLSTIFYQLNK	743, 570, 567, 374, 513, 374, 374, 686, 570, 690	83933.3,65155.025,64752.62,42426.355,58906.91,42393.325,42343.265,77652.155,65071.935,78063.615,	0.0604377	7.88929	2	5509,5737,6941,7165,7274,8270,30054,45202,	5	10				3	7		3	5
Isoform 2 of Probable hydrolase PNKD,	PNKD,	IPI00001022,	ENSP00000248451,	NP_001070867,	Q8N490-2,	ASSQSAPSPDVGSGVQT, EEPEPLSPELEYIPR, LSNTGEYESQR	142	15396.515,	0.302817	11.2515	3	0,		6	11		3	3	7			4		4	4			4
AFG3-like protein 2,	AFG3L2,	IPI00001091,	ENSP00000269143,	NP_006787,	Q9Y4W6,	GLGYAQYLPK, GMGGLFSVGETTAK, KVTQSAYAQIVQFGMNEK, NLETLQQELGIEGENR, QGDMVLEKPYSEATAR, STYEEFVEGTGSLDEDTSLPEGLKDWNK, VALLLLEK, VGQISFDLPR, VSEEIFFGR, VTQSAYAQIVQFGMNEK	797	88583.03,	0.161857	8.9836	10	166,4222,5524,5739,5743,6508,8270,16020,16021,17111,30163,46872,51082,	7	5	9	4	11		9	9	4	6		6	11		11	9
3-ketoacyl-CoA thiolase, mitochondrial,	ACAA2,	IPI00001539,	ENSP00000285093,	NP_006102,	P42765,	AANDAGYFNDEMAPIEVK, DFTATDLSEFAAK, DGTVTAGNASGVADGAGAVIIASEDAVK, DGTVTAGNASGVADGAGAVIIASEDAVKK, DMDLVEVNEAFAPQYLAVER, ITAHLVHELR, ITAHLVHELRR, KHNFTPLAR, LEDSLWVSLTDQHVQLPMAMTAENLAVK, RTPFGAYGGLLK, TNVNGGAIALGHPLGGSGSR, TPFGAYGGLLK, VSPETVDSVIMGNVLQSSSDAIYLAR	397	41923.82,	0.465995	8.20716	13	3988,5739,5743,6629,6631,6695,8415,16740,	47	64	58	77	86	53	66	95	64	54	46	78	79	71	72	82
Mitochondrial import inner membrane translocase subunit Tim13,	TIMM13,	IPI00001589,	ENSP00000215570,	NP_036590,	Q9Y5L4,	LDPGLIMEQVK, VQIAVANAQELLQR	95	10499.96,	0.263158	8.32425	2	5515,5739,5744,6457,7605,8270,15031,16020,42719,45039,46872,	4	3	6	5	10		9	7	3	5		10	9	4	7	6
Isoform 1 of Serine protease HTRA2, mitochondrial precursor,Isoform 3 of Serine protease HTRA2, mitochondrial precursor,	HTRA2,	IPI00001663,IPI00220543,	ENSP00000258080,ENSP00000366728,	NP_037379,	O43464-1,O43464-3,	EPLPTLPLGR, GRETLTLYVTPEVTE, LLSGDTYEAVVTAVDPVADIATLR, QGEFVVAMGSPFALQNTITSGIVSSAQRPAR, SQYNFIADVVEK, TAPAVVYIEILDR, VTAGISFAIPSDR	458, 436	48840.365,46381.495,	0.264142	10.5723	7	4252,5634,5739,5758,5783,5789,6508,6915,6950,16020,16021,51082,		4	3		4	2	7	4	3	3		4	4		2	6
Endonuclease domain-containing 1 protein precursor,	ENDOD1,	IPI00001952,	ENSP00000278505,	NP_055851,	O94919,	ILEVVNQIQDEER, QALNTDYLDSDYQR, STLLPPEASEGSSSFLGK	500	55016.055,	0.09	5.37572	3	3676,4519,16787,	2	2	2							2
Myosin light chain 2,	MYLPF,	IPI00002352,	ENSP00000325239,	NP_037424,	Q96A32,	DGIIDKEDLR, EAFTVIDQNR, EASGPINFTVFLTMFGEK, GADPEDVITGAFK, LKGADPEDVITGAFK, LNVKNEELDAMMK, NEELDAMMK, NMWAAFPPDVGGNVDYK	170	19085.515,	0.488235	4.61581	8	3774,5509,16459,	11	13	7	18	5	10	38	6	15	30	6	49	14	9	15	24
45 kDa protein,Serine hydroxymethyltransferase (Fragment),Serine hydroxymethyltransferase, mitochondrial precursor,	SHMT2,	IPI00002520,IPI00748411,IPI00789370,IPI00794549,	ENSP00000333667,	NP_005403,	P34897,	PRLIIAGTSAYAR, TGLIDYNQLALTAR	504, 480, 504, 408	55992.385,52909.285,55973.345,44615.855,	0.0573923	9.10673	2	3824,4372,5739,6544,6563,6730,30170,										3
ATP synthase, H+ transporting, mitochondrial F0 complex, subunit F6 isoform b precursor,ATP synthase-coupling factor 6, mitochondrial precursor,	ATP5J,	IPI00002521,IPI00456008,	ENSP00000284971,	NP_001003696,NP_001003697,NP_001003701,NP_001003703,NP_001676,	P18859,	FEDPKFEVIEKPQA, FEVIEKPQA, LKQMFGNADMNTFPTFK, QMFGNADMNTFPTFK, QTSGGPVDASSEYQQELER, RQTSGGPVDASSEYQQELER	108, 116	12587.415,13388.315,	0.455939	9.90208	6	5624,5739,5743,6811,15986,15992,16469,45263,46933,46961,	13	22	37	31	49	13	47	32	26	9	14	42	58	30	41	32
Beta-sarcoglycan,	SGCB,	IPI00002970,	ENSP00000295211,ENSP00000370839,	NP_000223,	Q16585,	LPSSSSGDQLGSGDWVR, TQNILFSTDYETHEFHLPSGVK	318	34776.515,	0.122642	8.81281	2	5737,5856,5887,7010,7517,16012,16020,	2	3							3
Cation-transporting ATPase,Sodium/potassium-transporting ATPase subunit alpha-2 precursor,	ATP1A2,	IPI00003021,IPI00640401,	ENSP00000354490,ENSP00000357063,	NP_000693,	P50993,	ADIGIAMGISGSDVSK, DTAGDASESALLK, EIPLDKEMQDAFQNAYMELGGLGER, FDTDELNFPTEK, GVGIISEGNETVEDIAAR, IATLASGLEVGR, LNIPMSQVNPR, LSLDELGR, MQINAEEVVVGDLVEVK, NHTEIVFAR, NMVPQQALVIR, QAADMILLDDNFASIVTGVEEGR, QGAIVAVTGDGVNDSPALK, VAEIPFNSTNK, VDNSSLTGESEPQTR, VIMVTGDHPITAK	1020, 1009	112264.385,110861.72,	0.229677	5.2965	16	166,5524,5737,5886,5890,6814,6942,8152,15077,15662,15672,16020,16021,16787,16820,30317,30641,	17	14	20	15	14	4	12	6	16	13		16	27	8	6	10
Isoform 1 of Isochorismatase domain-containing protein 2, mitochondrial precursor,Isoform 2 of Isochorismatase domain-containing protein 2, mitochondrial precursor,	ISOC2,	IPI00003031,IPI00551022,	ENSP00000085068,	NP_078986,	Q96AB3-1,Q96AB3-2,	EPAPDSGLLGLFQGQNSLLH, HNIAYFPQIVSVAAR, LIKEPAPDSGLLGLFQGQNSLLH, LLEVPVMLTEQYPQGLGPTVPELGTEGLRPLAK	221, 205	24096.91,22336.96,	0.333804	7.88387	4	3824,5739,8152,	22	31	12	17	36	33	30	19	27	33	15	28	24		18	24
ADP-ribosylation factor-like protein 2,	ARL2,SNX15,	IPI00003326,	ENSP00000246747,	NP_001658,	P36404,	ELQSLLVEER, LAGATLLIFANK, LLMLGLDNAGK, QDLPGALSSNAIR	184	20877.765,	0.25	6.27037	4	166,5095,5525,5622,7021,7264,	3			2	6			2	5	3		5	3
HSPA5 protein,	HSPA5,	IPI00003362,	ENSP00000324173,	NP_005338,	P11021,	AKFEELNMDLFR, DNHLLGTFDLTGIPPAPR, ELEEIVQPIISK, IEWLESHQDADIEDFK, IINEPTAAAIAYGLDKR, KSDIDEIVLVGGSTR, MKETAEAYLGK, NELESYAYSLK, NQLTSNPENTVFDAK, SDIDEIVLVGGSTR, SQIFSTASDNQPTVTIK, TFAPEEISAMVLTK, TKPYIQVDIGGGQTK, TWNDPSVQQDIK, VTHAVVTVPAYFNDAQR	655	72421.55,	0.308397	4.79502	15	166,5515,5524,5783,	11	2	13	6	4	2	10	3		4		8	15		13	6
[Pyruvate dehydrogenase [lipoamide]] kinase isozyme 4, mitochondrial precursor,	PDK4,	IPI00003425,	ENSP00000005178,	NP_002603,	Q16654,	ALSDFVDTLIK, EIDILPTQLVNTSSVQLVK, NAPLAGFGYGLPISR	411	46468.79,	0.109489	6.64643	3	4673,4740,5524,5739,5743,5975,6006,16310,18106,			3				3		2
2,4-dienoyl-CoA reductase, mitochondrial precursor,	DECR1,	IPI00003482,	ENSP00000220764,	NP_001350,	Q16698,	AMLPPNSFQGK, ATAEQISSQTGNK, DPDMVQNTVSELIK, EQWDTIEELIR, EQWDTIEELIRK, FDGGEEVLISGEFNDLR, FDGGEEVLISGEFNDLRK, FNVIQPGPIK, GAAFLSITTIYAETGSGFVVPSASAK, LDPTGTFEKEMIGR, VAFITGGGTGLGK, VAGHPNIVINNAAGNFISPTER	335	36067.4,	0.456716	9.84023	12	5739,8152,8670,16491,	110	87	63	51	105	29	58	39	75	45	38	67	62	71	81	43
ETHE1 protein, mitochondrial precursor,	ETHE1,	IPI00003766,	ENSP00000292147,	NP_055112,	O95571,	EAVLIDPVLETAPR, IMGNLNLPKPQQIDFAVPANMR, LSGAQADLHIEDGDSIR	254	27872.645,	0.208661	6.83364	3	5737,5739,8270,16787,46872,		3	3	3	3		4					4			2	2
28 kDa protein,Mitochondrial carrier homolog 2,	MTCH2,	IPI00003833,IPI00794006,	ENSP00000303222,	NP_055157,	Q9Y6C9,	EEGILGFFAGLVPR, EVSSSFDHVIK, GLFTGLTPR, SAATLITHPFHVITLR, SMVQFIGR, VLIQVGYEPLPPTIGR	303, 258	33330.59,28025.415,	0.265523	7.89981	6	5488,6810,16020,16021,	9	15	12	4	23	15	27	22	19	20	8	23	27		13	20
DnaJ homolog subfamily B member 4,	DNAJB4,	IPI00003848,	ENSP00000359799,	NP_008965,	Q9UDY4,	EGDETPNSIPADIVFIIK, IIGYGLPFPK	337	37806.47,	0.083086	8.78146	2	6457,6986,9408,31072,51082,												2
Putative ATP-dependent Clp protease proteolytic subunit, mitochondrial precursor,	CLPP,	IPI00003870,	ENSP00000245816,	NP_006003,	Q16740,	DRYMSPMEAQEFGILDK, GQATDIAIQAEEIMK, VLVHPPQDGEDEPTLVQK	277	30179.76,	0.180505	8.21343	3	5739,6508,8233,8462,		2			2							3	2
60S ribosomal protein L4,	RPL4,	IPI00003918,	ENSP00000311430,	NP_000959,	P36578,	APIRPDIVNFVHTNLR, IEEVPELPLVVEDK, IEEVPELPLVVEDKVEGYKK, KLDELYGTWR, NIPGITLLNVSK	427	47696.95,	0.135831	11.6996	5	3723,3735,5515,5622,5840,5842,6412,			3				3			5		2
Isoform 1 of Pyruvate dehydrogenase E1 component subunit beta, mitochondrial precursor,Isoform 2 of Pyruvate dehydrogenase E1 component subunit beta, mitochondrial precursor,	PDHB,	IPI00003925,IPI00549885,	ENSP00000307241,ENSP00000373220,	NP_000916,	P11177-1,P11177-2,	DAINQGMDEELER, DAINQGMDEELERDEK, DFLIPIGK, DIIFAIK, DIIFAIKK, DNNPVVVLENELMYGVPFEFPPEAQSK, EGVECEVINMR, IIDTPISEMGFAGIAVGAAMAGLR, ILEDNSIPQVK, IMEGPAFNFLDAPAVR, QGTHITVVSHSR, SAIRDNNPVVVLENELMYGVPFEFPPEAQSK, TIRPMDMETIEASVMK, TYYMSGGLQPVPIVFR, VFLLGEEVAQYDGAYK, VTGADVPMPYAK, VVSPWNSEDAK	359, 341	39233.1,37199.71,	0.594679	6.16678	17	4739,5739,6006,6096,6099,16491,	169	221	225	248	263	132	224	245	232	167	127	250	230	237	232	248
Hydroxyacylglutathione hydrolase,hydroxyacyl glutathione hydrolase isoform 1,	HAGH,	IPI00003933,IPI00745553,	ENSP00000262303,	NP_001035517,NP_005317,	Q16775,	EAAIVDPVQPQK, TVQQHAGETDPVTTMR	308, 260	33805.645,28859.855,	0.0993007	7.79065	2	4416,8270,16787,46872,									6
Histone H2B type 1-B,Histone H2B type 1-J,Histone H2B type 1-O,Histone H2B type 2-E,Histone H2B type 3-B,	HIST1H2BB,HIST1H2BC,HIST1H2BE,HIST1H2BF,HIST1H2BG,HIST1H2BI,HIST1H2BJ,HIST1H2BO,HIST2H2BE,HIST3H2BB,	IPI00003935,IPI00152785,IPI00166293,IPI00220403,IPI00515061,	ENSP00000244601,ENSP00000336417,ENSP00000346676,ENSP00000349412,ENSP00000350580,ENSP00000358151,ENSP00000366560,	NP_003518,NP_003519,NP_066402,NP_066406,NP_778225,	P06899,P23527,P33778,Q16778,Q8N257,	AMGIMNSFVNDIFER, KESYSIYVYK, LLLPGELAK	126, 126, 126, 126, 126	13920.055,13906.025,13908.005,13950.075,13904.055,	0.269841	11.0044	3	786,3677,5634,5694,6334,7001,42742,	83	23	63	87	20	21	37	70	33	26		36	26	48	24	67
Lipoamide acyltransferase component of branched-chain alpha-keto acid dehydrogenase complex, mitochondrial precursor,	DBT,	IPI00003944,	ENSP00000359151,	NP_001909,	P11182,	ILKEDILNYLEK, LGSVGQLSTTDLTGGTFTLSNIGSIGGTFAK, SYLENPAFMLLDLK, VEIMPPPPKPK	482	53486.635,	0.141079	8.75414	4	5515,5739,5947,8152,8415,16740,31405,43754,		4	4	2	4	2	4	3						4	5
NADH dehydrogenase [ubiquinone] 1 alpha subcomplex subunit 9, mitochondrial precursor,	NDUFA9,	IPI00003968,	ENSP00000266544,	NP_004993,	Q16795,	DAFPEAIIVKPSDIFGR, DAFPEAIIVKPSDIFGREDR, FGPIPLGSLGWK, FIHVSHLNANIK, FLNSFASMHR, GIVNAVKDPDANGK, IPQAIAQLSK, LFLPFPLPLFAYR, LPHLPGLEDLGIQATPLELK, MGSQVIIPYR, MHITDMKLPHLPGLEDLGIQATPLELK, NFDFEDVFVK, QPVYVVDVSK, RVVQHSNVVINLIGR, SFAFVGPSR, SSVSGIVATVFGATGFLGR, TVKQPVYVVDVSK, VFEISPFEPWITR, VVQHSNVVINLIGR, WLSAEIEDVKPAK, YIFAVAHR, YLLFHLVK, YVVNHLGR	377	42509.18,	0.647215	10.372	23	3954,5515,5739,5743,5747,5759,6120,6814,8137,16491,44237,50662,	181	183	159	177	219	90	162	154	181	171	93	147	145	85	126	147
Isoform 1 of Valacyclovir hydrolase precursor,Isoform 2 of Valacyclovir hydrolase precursor,	BPHL,	IPI00003990,IPI00384428,	ENSP00000369734,ENSP00000369739,	NP_004323,	Q86WA6-1,Q86WA6-2,	KPLEALYGYDYFAR, VSLLGWSDGGITALIAAAK	274, 291	31106.415,32542.32,	0.11692	9.1636	2	5739,6519,6725,9636,16787,							2	2
Protein NipSnap3A,	NIPSNAP3A,	IPI00004845,	ENSP00000344174,	NP_056284,	Q9UFN0,	AVHAHVNLGYTK, DKEWQEQFLIPNLALIDK, ESVNYLVSQQNMLLIPTSFSPLK, LVGVFHTEYGALNR, MNEFLENFEK, QYDGIFYEFR, VHVLWWNESADSR	247	28466.42,	0.404858	9.54799	7	5737,	7	3	8	4	14	4	5	2	12	9	1	6		2	13	2
Isoform 1 of Electron transfer flavoprotein subunit beta,Isoform 2 of Electron transfer flavoprotein subunit beta,	ETFB,	IPI00004902,IPI00556451,	ENSP00000311930,ENSP00000346173,	NP_001014763,NP_001976,	P38117-1,P38117-2,	EIDGGLETLR, EKVDLVLLGK, GIHVEVPPAEAER, HSMNPFCEIAVEEAVR, IEVIKPGDLGVDLTSK, KIEVIKPGDLGVDLTSK, LGPLQVAR, LKLPAVVTADLR, LPAVVTADLR, LSVISVEDPPQR, TAGVKVETTEDLVAK, TALAMGADR, VDLVLLGK, VETTEDLVAK	255, 346	27843.38,37434.165,	0.415516	7.76669	14	5739,5759,6118,6810,9055,	60	64	74	64	82	53	64	44	69	72	27	53	43	43	65	38
Ribonuclease UK114,	HRSP12,	IPI00005038,	ENSP00000254878,	NP_005827,	P52758,	AAYQVAALPK, APGAIGPYSQAVLVDR, IEIEAVAIQGPLTTASL, TIYISGQIGMDPSSGQLVSGGVAEEAK, TTVLLADINDFNTVNEIYK	137	14493.53,	0.649635	9.01564	5	4519,5634,5737,6449,16787,		6			9	7	8	7	7		3	10	4			6
Medium-chain specific acyl-CoA dehydrogenase, mitochondrial precursor,Putative uncharacterized protein DKFZp686M24262,	ACADM,	IPI00005040,IPI00513827,	ENSP00000359871,ENSP00000359878,	NP_000007,	P11310,	AFAGDIANQLATDAVQILGGNGFNTEYPVEK, AFTGFIVEADTPGIQIGR, ANWYFLLAR, EEIIPVAAEYDK, EEIIPVAAEYDKTGEYPVPLIR, ENVLIGDGAGFK, EPGLGFSFEFTEQQK, GIVFEDVKVPK, IYQIYEGTSQIQR, KGDEYIINGQK, LLVEHQAISFMLAEMAMK, NTYYASIAK, QREPGLGFSFEFTEQQK, TGEYPVPLIR, TRPVVAAGAVGLAQR, VAMGAFDK	421, 454	46587.98,50270.215,	0.44406	8.19888	16	3995,5739,5759,6118,6631,6635,8152,50660,	52	79	56	43	77	46	50	58	74	37	37	48	48	44	51	90
Lon protease homolog,Lon protease homolog, mitochondrial precursor,	LONP1,	IPI00005158,IPI00334291,	ENSP00000351177,ENSP00000353826,	NP_004784,	P36776,	DIIALNPLYR, ILEFIAVSQLR, IVSGEAESVEVTPENLQDFVGKPVFTVER, LAQPYVGVFLK, LGLLDNHSSEFNVTR, LSSDVLTLLIK, TENPLILIDEVDK, YSNENLDLAR	959, 896	106488.42,100212.735,	0.118735	6.41561	8	166,4176,4252,5524,5739,6510,17111,		3		2	9		4	4	2	2		9	7			5
Membrane-associated progesterone receptor component 2,	PGRMC2,	IPI00005202,	ENSP00000296425,	NP_006311,	O15173,	DFSLEQLR, FYGPAGPYGIFAGR, GLGAGAGAGEESPATSLPR	247	26169.89,	0.165992	4.92505	3	3707,4872,5496,8289,16020,16021,20037,46914,												2	3
39S ribosomal protein L12, mitochondrial precursor,	MRPL12,	IPI00005537,	ENSP00000333837,	NP_002940,	P52815,	AALEAVGGTVVLE, IQDVGLVPMGGVMSGAVPAAAAQEAVEEDIPIAK, KLVESLPQEIK, LVESLPQEIK, NYIQGINLVQAK	198	21347.945,	0.353535	9.27359	5	3723,3735,5622,5739,5762,5840,6412,	13	12	13	10	10	14	11	11	15	18	5	19	11	7	14	15
Isoform 1 of Ras-related protein Rab-1A,Isoform 2 of Ras-related protein Rab-1A,Ras-related protein Rab-1B,	RAB1A,RAB1B,	IPI00005719,IPI00008964,IPI00334174,	ENSP00000260638,ENSP00000310226,ENSP00000348546,	NP_004152,NP_112243,	P62820-1,P62820-2,Q9H0U4,	EFADSLGIPFLETSAK, LLLIGDSGVGK	205, 201, 141	22677.57,22170.96,15330.46,	0.152508	6.55985	2	166,5515,5525,5783,5794,7264,15031,16020,			2							2					2
13kDa differentiation-associated protein variant (Fragment),	NDUFA12,	IPI00005966,	ENSP00000330737,	NP_061326,	Q9UI09,	FNVTGTPEQYVPYSTTR, GLQQITGHGGLR, IQEWIPPSTPYK, KIQEWIPPSTPYK, NTFWDVDGSMVPPEWHR, RGLQQITGHGGLR, VGTLVGEDK, VGTLVGEDKYGNK, WLHSMTDDPPTTKPLTAR	146	17214.505,	0.623288	10.1	9	3954,5739,6118,6979,7585,8137,16020,	90	121	69	87	87	24	38	28	96	91	16	58	44	57	58	37
Isoform 1 of Dystrophin,Isoform 2 of Dystrophin,Isoform 3 of Dystrophin,Isoform 4 of Dystrophin,dystrophin Dp427l isoform,dystrophin Dp427p1 isoform,	DMD,	IPI00006091,IPI00220577,IPI00304638,IPI00304639,IPI00375141,IPI00472316,	ENSP00000288447,ENSP00000354923,ENSP00000367948,ENSP00000367953,ENSP00000367955,ENSP00000367958,	NP_000100,NP_003997,NP_003998,NP_004000,NP_004001,NP_004002,NP_004003,	P11532-1,P11532-2,P11532-3,P11532-4,	LGLLLHDSIQIPR, MTELYQSLADLNNVR, QLGEVASFGGSNIEPSVR, RLGLLLHDSIQIPR	3685, 2343, 2346, 3677, 3562, 3681	426688.55,271218.43,271586.905,425579.29,412397.235,425939.61,	0.0152656	5.8845	4	3779,5509,5515,5737,5856,6936,7517,8270,8307,16010,43034,43043,					4	4	5	5	3			7	2	2		4
28S ribosomal protein S7, mitochondrial precursor,	MRPS7,	IPI00006440,	ENSP00000245539,	NP_057055,	Q9Y2R9,	LLEAFHNQGPVIK, SLMIQTLEAVK, TSSVFEDPVISK, YHAASAEEQATIER, YSPEFKDPLIDKEYYR	242	28161.905,	0.272727	10.6242	5	3723,3735,5515,5622,5739,5840,5843,6412,	5		2	2			3			3		5	4		4	4
Cytochrome c oxidase subunit 4 isoform 1, mitochondrial precursor,	COX4I1,	IPI00006579,	ENSP00000253452,	NP_001852,	P13073,	ASWSSLSMDEK, ASWSSLSMDEKVELYR, DHPLPEVAHVK, ESFAEMNR, FKESFAEMNR, HYVYGPLPQSFDK, HYVYGPLPQSFDKEWVAK, RDHPLPEVAHVK, SEDFSLPAYMDR, SEDFSLPAYMDRR, VNPIQGLASK, WDYEKNEWK	169	19576.6,	0.514793	10.1207	12	4129,5515,5739,5743,6118,16020,16491,	377	443	294	431	290	141	152	122	363	293	104	266	127	396	307	134
28S ribosomal protein S26, mitochondrial precursor,	MRPS26,	IPI00006606,	ENSP00000369682,	NP_110438,	Q9BYN8,	EVLQLQEEVK, VNMPPAVDPAEFFVLMER	205	24211.52,	0.136585	11.0237	2	5739,5763,30529,42769,43043,	5									3
Aldehyde dehydrogenase, mitochondrial precursor,Mitochondrial aldehyde dehydrogenase 2 variant (Fragment),	ALDH2,	IPI00006663,IPI00792207,	ENSP00000261733,	NP_000681,	P05091,	AAFQLGSPWR, ANNSTYGLAAAVFTK, EAGFPPGVVNIVPGFGPTAGAAIASHEDVDK, EEIFGPVMQILK, ELGEYGLQAYTEVK, GYFIQPTVFGDVQDGMTIAK, ILGYINTGK, KILGYINTGK, LGPALATGNVVVMK, TEQGPQVDETQFK, TEQGPQVDETQFKK, TFVQEDIYDEFVER, TIPIDGDFFSYTR, VAEQTPLTALYVANLIK, VAFTGSTEIGR, VIQVAAGSSNLK, VIQVAAGSSNLKR, VVGNPFDSK	517, 517	56380.93,56366.91,	0.417795	7.0541	18	5739,5975,6066,8152,9055,16491,	28	54	47	68	41	42	47	58	45	25	46	19	48	55	47	66
Isoform 1 of Dynamin-like 120 kDa protein, mitochondrial precursor,Isoform 2 of Dynamin-like 120 kDa protein, mitochondrial precursor,Isoform 3 of Dynamin-like 120 kDa protein, mitochondrial precursor,Isoform 5 of Dynamin-like 120 kDa protein, mitochondrial precursor,Isoform 7 of Dynamin-like 120 kDa protein, mitochondrial precursor,Isoform 8 of Dynamin-like 120 kDa protein, mitochondrial precurs…	OPA1,	IPI00006721,IPI00107749,IPI00107750,IPI00107751,IPI00107752,IPI00107753,IPI00375149,IPI00375150,IPI00789199,IPI00797488,	ENSP00000354429,ENSP00000354681,ENSP00000354781,ENSP00000355311,ENSP00000355324,	NP_056375,NP_570844,NP_570845,NP_570846,NP_570847,NP_570848,NP_570849,NP_570850,	O60313-1,O60313-2,O60313-3,O60313-4,O60313-5,O60313-6,O60313-7,O60313-8,	AKNEILDEVISLSQVTPK, ALGYFAVVTGK, AVEVAWETLQEEFSR, EFDLTKEEDLAALR, GVEVDPSLIK, IDQLQEELLHTQLK, MVLVDLPGVINTVTSGMAPDTK, SLIDMYSEVLDVLSDYDASYNTQDHLPR, TSVLEMIAQAR, VTLSEGPHHVALFK	960, 989, 978, 979, 997, 1015, 952, 942, 969, 1006	111656.785,114974.36,113488.965,113680.05,115910.51,117742.69,110720.635,109426.325,112522.79,116776.515,	0.160501	7.82299	10	266,3924,5525,5739,5741,5758,6915,7007,7601,7605,8053,16020,16021,19896,30061,30425,45768,50896,		2	8		6			6		2			3		7	7
Isoform 1 of Dehydrogenase/reductase SDR family member 7 precursor,Isoform 2 of Dehydrogenase/reductase SDR family member 7 precursor,	DHRS7,	IPI00006957,IPI00339238,	ENSP00000216500,	NP_057113,	Q9Y394-1,Q9Y394-2,	DILVLPLDLTDTGSHEAATK, EKDILVLPLDLTDTGSHEAATK, LGVSLVLSAR, LIELNYLGTVSLTK	339, 289	38298.42,32267.29,	0.147431	8.81601	4	8152,16491,			3									3			2
LYR motif-containing protein 4,	LYRM4,	IPI00006979,	ENSP00000332502,	NP_065141,	Q9HD34,	DPVEIQTLVNK, NVKDPVEIQTLVNK	91	10758.33,	0.153846	11.2818	2	0,												3
39S ribosomal protein L11, mitochondrial precursor,	MRPL11,	IPI00007001,	ENSP00000308897,	NP_057134,	Q9Y3B7,	AGLAMPGPPLGPVLGQR, AQDEAFALQDVPLSSVVR, DLSSEELAAFQK, IGQPTVSYFLK, IKAQDEAFALQDVPLSSVVR	192	20682.985,	0.3125	10.6323	5	3735,5622,5739,5761,5840,6412,45182,	7	5	12	10	8	6	7	7	7	9	2	8	7	6	8	10
Mitochondrial fission 1 protein,	FIS1,	IPI00007052,	ENSP00000223136,	NP_057152,	Q9Y3D6,	DYVFYLAVGNYR, GIVLLEELLPK, GLLQTEPQNNQAK, KGIVLLEELLPK	152	16937.565,	0.243421	9.24165	4	266,5515,5739,5777,5779,6915,16020,16021,16559,19867,31307,	55	65	21	30	45	22	32	21	39	50	8	47	28		22	30
ADP/ATP translocase 2,	SLC25A5,	IPI00007188,	ENSP00000360671,	NP_001143,	P05141,	DFLAGGVAAAISK, GAWSNVLR, GMGGAFVLVLYDEIK, GMGGAFVLVLYDEIKK, GNLANVIR, LLLQVQHASK, LLLQVQHASKQITADK, TAVAPIER, YFPTQALNFAFK, YFPTQALNFAFKDK	298	32894.995,	0.278523	10.2348	10	5215,5488,5739,5743,5887,6810,15207,16020,	518	504	479	550	555	274	420	259	546	535	303	489	411	368	465	231
Isoform H14 of Myeloperoxidase precursor,Isoform H17 of Myeloperoxidase precursor,Isoform H7 of Myeloperoxidase precursor,	MPO,	IPI00007244,IPI00236554,IPI00236556,	ENSP00000225275,ENSP00000344419,	NP_000241,	P05164-1,P05164-2,P05164-3,	FPTDQLTPDQER, IANVFTNAFR, IGLDLPALNMQR, QNQIAVDEIR, VVLEGGIDPILR	745, 650, 777	83867.71,73853.115,87247.6,	0.0777979	9.24335	5	3682,4601,5506,5509,5634,5764,6916,6952,6979,16491,42744,											5		9
Propionyl-CoA carboxylase beta chain, mitochondrial precursor,	PCCB,	IPI00007247,	ENSP00000251654,	NP_000523,	P05166,	AYNMVDIIHSVVDER, DTSYLFITGPDVVK, GHENVEAAQAEYIEK, IMDQAITVGAPVIGLNDSGGAR, IQEGVESLAGYADIFLR, LLYAFAEATVPK, LVPELDTIVPLESTK, SVTNEDVTQEELGGAK	539	58215.13,	0.233766	7.69513	8	4658,5739,9062,16874,	2	6		6	8		7	3	3	2		4	5	2	3
Mitochondrial import inner membrane translocase subunit Tim23,Translocase of inner mitochondrial membrane 23 homolog B,similar to Mitochondrial import inner membrane translocase subunit Tim23 isoform 1,	TIMM23,TIMM23B,	IPI00007309,IPI00640747,IPI00787101,	ENSP00000260867,ENSP00000363211,	NP_006318,XP_933207,	O14925,	GAEDDLNTVAAGTMTGMLYK, NVQILNMVTR, YLVQDTDEFILPTGANK	209, 257, 171	21943.01,28048.21,17870.34,	0.227538	8.88726	3	5739,5744,5758,5887,6886,15450,16020,19867,							2			5
Isoform 1 of Acyl-protein thioesterase 1,Isoform 2 of Acyl-protein thioesterase 1,	LYPLA1,	IPI00007321,IPI00398727,	ENSP00000320043,ENSP00000344477,	NP_006321,	O75608-1,O75608-2,	ASFPQGPIGGANR, IILGGFSQGGALSLYTALTTQQK	230, 214	24669.355,22875.195,	0.162373	6.63422	2	4622,5624,5737,6629,6631,16787,					2
ATP synthase subunit O, mitochondrial precursor,	ATP5O,	IPI00007611,	ENSP00000290299,ENSP00000370601,	NP_001688,	P48047,	ERFSPLTTNLINLLAENGR, FSPLTTNLINLLAENGR, GEVPCTVTSASPLEEATLSELK, LSNTQGVVSAFSTMMSVHR, LVRPPVQVYGIEGR, PPVQVYGIEGR, QNKLEQVEK, SFLSQGQVLK, TDPSILGGMIVR, TVLKSFLSQGQVLK, VAASVLNPYVK, VAQILKEPK, YATALYSAASK	213	23277.12,	0.657277	10.6082	13	5215,5624,5739,5753,6811,15986,15992,16469,16787,45261,46872,46933,46961,	331	297	322	415	386	116	237	224	324	252	101	313	200	311	319	186
Coiled-coil-helix-coiled-coil-helix domain-containing protein 2,Coiled-coil-helix-coiled-coil-helix domain-containing protein 9,	CHCHD2,CHCHD9,	IPI00007673,IPI00401259,	ENSP00000334455,ENSP00000352987,ENSP00000365769,	NP_057223,XP_933474,XP_942557,	Q9Y6H1,	AAPRPAPVAQPPAAAPPSAVGSSAAAPR, PAPVAQPPAAAPPSAVGSSAAAPR	151, 151	15512.45,15489.47,	0.18543	9.96218	2	0,	10	11	10			13	10	6	9	17	5	9	8		10	12
Stress-70 protein, mitochondrial precursor,	HSPA9,	IPI00007765,	ENSP00000297185,	NP_004125,	P38646,	AQFEGIVTDLIR, ASNGDAWVEAHGK, DAGQISGLNVLR, EQQIVIQSSGGLSK, EQQIVIQSSGGLSKDDIENMVK, ERVEAVNMAEGIIHDTETK, ETGVDLTKDNMALQR, LLGQFTLIGIPPAPR, LYSPSQIGAFVLMK, MKETAENYLGHTAK, NAVITVPAYFNDSQR, QAASSLQQASLK, QAVTNPNNTFYATK, SDIGEVILVGGMTR, SQVFSTAADGQTQVEIK, STNGDTFLGGEDFDQALLR, TTPSVVAFTADGER, VEAVNMAEGIIHDTETK, VINEPTAAALAYGLDK, VQQTVQDLFGR	679	73679.95,	0.394698	6.00916	20	166,5524,5737,5739,6457,6611,6916,9986,51082,	113	115	118	140	166	58	118	111	101	102	47	108	198	102	114	118
Myosin-2,	MYH2,	IPI00007856,	ENSP00000245503,	NP_001093582,NP_060004,	Q9UKX2,	Big String	1941	223042.73,	0.535806	5.56473	129	146,166,3779,5516,5524,5863,6941,16459,	1849	2746	1972	1593	1664	1048	2108	2112	3462	2643	1566	4347	2248	2997	2154	2370
NADH-ubiquinone oxidoreductase chain 1,	MTND1,	IPI00007961,	ENSP00000354687,	AP_000639,NP_536843,	P03886,	GPNVVGPYGLLQPFADAMK, ILGYMQLR, KGPNVVGPYGLLQPFADAMK	318	35660.055,	0.0880503	6.53323	3	5515,5739,5747,6120,8137,16020,16021,16491,31966,	14	15		26	41				9	12					7	16
Diablo homolog, mitochondrial precursor,Isoform 2 of Diablo homolog, mitochondrial precursor,	DIABLO,	IPI00008418,IPI00219865,	ENSP00000267169,ENSP00000339963,	NP_063940,NP_620308,	Q9NR28-1,Q9NR28-2,	AESEQEAYLRED, AVYTLTSLYR, LAEAQIEELR, LQVEEVHQLSR, MNSEEEDEVWQVIIGAR, SEPHSLSSEALMR, TQEEGEERAESEQEAYLRED	315, 186	35844.83,21232.485,	0.346313	7.04541	7	5515,5739,6915,6917,8625,8635,	28	37	20	18	30	15	27	15	22	24	7	25	13	16	15	19
Amine oxidase [flavin-containing] A,	MAOA,	IPI00008483,	ENSP00000340684,	NP_000231,	P21397,	DVPAVEITHTFWER, FVGGSGQVSER, IFFAGTETATK, IFSVTNGGQER, NEHVDYVDVGGAYVGPTQNR, YVINAIPPTLTAK	527	59681.27,	0.151803	7.96125	6	5515,5739,6118,6584,7610,8131,16020,16021,16491,42420,		2	16	1	1		3	3	2	2		4	3		1	1
NADH-ubiquinone oxidoreductase chain 4,	MTND4,	IPI00008495,	ENSP00000354961,	AP_000648,NP_536852,	P03905,	AHVEAPIAGSMVLAAVLLK, LIVPTIMLLPLTWLSK, LTLILNPLTK, MPLYGLHLWLPK	459	51580.26,	0.124183	9.66794	4	5739,5747,6120,8137,16491,42773,	5	11			13		4	4	6	4		13	13			5
NADH-ubiquinone oxidoreductase chain 5,	MTND5,	IPI00008511,		AP_000649,	P03915,	ADANTAAIQAILYNR, FPTLTNINENNPTLLNPIK, FPTLTNINENNPTLLNPIKR, MILLTLTGQPR, TISQHQISTSIITSTQK, TMPLTSTSLTIGSLALAGMPFLTGFYSK	603	67025.67,	0.150912	9.32179	6	5739,5747,6120,8137,16020,16021,16491,42773,	13	19	13	21	31	8	13	14	23	15	12	24	27	13	5	13
ATP synthase protein 8,	MTATP8,	IPI00008528,	ENSP00000355265,	AP_000643,NP_536847,	P03928,	MLNTNYHLPPSPK, MLNTNYHLPPSPKPMK	68	7991.605,	0.235294	10.5552	2	276,5739,6811,15986,15992,16020,16021,16469,46933,46961,			20			5	14	30							7
60S acidic ribosomal protein P2,	RPLP2,	IPI00008529,	ENSP00000322419,	NP_000995,	P05387,	ILDSVGIEADDDRLNK, NIEDVIAQGIGK	115	11664.77,	0.243478	4.14096	2	3723,3735,5622,5840,5842,6414,							3	3
16 kDa protein,18 kDa protein,19 kDa protein,23 kDa protein,24 kDa protein,60S acidic ribosomal protein P0,	RPLP0,	IPI00008530,IPI00556485,IPI00791188,IPI00792267,IPI00793002,IPI00793584,IPI00794884,	ENSP00000339027,ENSP00000366471,	NP_000993,NP_444505,	P05388,	EDLTEIRDMLLANK, IIQLLDDYPK, TSFFQALGITTK	317, 255, 162, 147, 172, 211, 220	34273.16,27435.51,18153.245,16298.04,18899.095,23090.08,24298.035,	0.180774	9.17598	3	5622,5840,5842,42254,			3		3	4	6	3		5		7		3
Transmembrane protein 14C,	TMEM14C,	IPI00009346,	ENSP00000229563,	NP_057546,	Q9P0S9,	AGSVPSLAAGLLFGSLAGLGAYQLSQDPR, FMPAGLIAGASLLMVAK	112	11564.505,	0.410714	10.2511	2	16020,16021,		7							11				22
Sideroflexin-1,	SFXN1,	IPI00009368,	ENSP00000316905,	NP_073591,	Q9H9B4,	NILLTNEQLESAR, QGIVPPGLTENELWR, SSMSVTSLEAELQAK, YIYDSAFHPDTGEK	322	35619.125,	0.177019	9.40556	4	5506,5515,5739,5743,6812,6826,8324,16020,16021,30218,		4	4	4	3		2	4	4			4	4	3	4
Ras-related protein Rap-2c precursor,	RAP2C,	IPI00009607,	ENSP00000340274,ENSP00000359911,	NP_067006,	Q9Y3L5,	EIEVDSSPSVLEILDTAGTEQFASMR, SMVDELFAEIVR	183	20744.64,	0.20765	4.58476	2	166,5525,5622,7264,16020,												3
Sulfide:quinone oxidoreductase, mitochondrial precursor,	SQRDL,	IPI00009634,	ENSP00000260324,	NP_067022,	Q9Y6N5,	EGNAIFTFPNTPVK, TAAAVAAQSGILDR, YADALQEIIQER	450	49960.335,	0.0888889	9.50995	3	5739,5743,16491,			3
39S ribosomal protein L44, mitochondrial precursor,	MRPL44,	IPI00009680,	ENSP00000258383,	NP_075066,	Q9H9J2,	IINPMGLLVEELK, LQENFSLDLLK	332	37535.045,	0.0722892	8.56682	2	3674,3725,4519,4525,5575,5622,5739,6396,8150,16787,30529,															3
Isoform WA of Plasma membrane calcium-transporting ATPase 2,Isoform WB of Plasma membrane calcium-transporting ATPase 2,Isoform XA of Plasma membrane calcium-transporting ATPase 2,Isoform XB of Plasma membrane calcium-transporting ATPase 2,Isoform ZA of Plasma membrane calcium-transporting ATPase 2,Isoform ZB of Plasma membrane calcium-transporting ATPase 2,	ATP2B2,	IPI00009791,IPI00219293,IPI00219294,IPI00219295,IPI00219296,IPI00219297,	ENSP00000324172,ENSP00000342954,ENSP00000344677,ENSP00000353414,ENSP00000373311,	NP_001001331,NP_001674,	Q01814-1,Q01814-2,Q01814-3,Q01814-4,Q01814-5,Q01814-6,	AGQVVQIPVAEIVVGDIAQVK, IDESSLTGESDQVR, TSPVEGLPGTAPDLEK, YGDLLPADGLFIQGNDLK	1243, 1199, 1185, 1154, 1229, 1198	136875.18,131616.52,130169.96,127333.935,135428.62,132592.595,	0.0574696	5.92809	4	166,287,5388,5509,5516,5524,5737,5886,6812,6816,7605,8152,16021,16787,16820,30182,	2	2					4			4		9	3		3	4
Mast cell carboxypeptidase A precursor,	CPA3,	IPI00009829,	ENSP00000296046,	NP_001861,	P15088,	FGFLLPESR, IGSTVEDNPLYVLK, IGTDVLSTR, MMDKYPEMVSR	417	48699.52,	0.103118	9.38052	4	4180,4182,6508,8237,8270,30141,46872,	12	4	7	7	4	5	9	5		5		7	5	14	58	10
Keratin, type I cytoskeletal 10,	KRT10,	IPI00009865,	ENSP00000269576,	NP_000412,	P13645,	ADLEMQIESLTEELAYLK, ADLEMQIESLTEELAYLKK, AETECQNTEYQQLLDIK, ALEESNYELEGK, DAEAWFNEK, ELTTEIDNNIEQISSYK, ELTTEIDNNIEQISSYKSEITELRR, GSLGGGFSSGGFSGGSFSR, IRLENEIQTYR, LAADDFR, LASYLDK, LASYLDKVR, LENEIQTYR, LKYENEVALR, NQILNLTTDNANILLQIDNAR, NVQALEIELQSQLALK, NVSTGDVNVEMNAAPGVDLTQLLNNMR, QSLEASLAETEGR, QSVEADINGLR, QSVEADINGLRR, RVLDELTLTK, SKELTTEIDNNIEQISSYK, SLLEGEGSSGGGGR, SQYEQLAEQNR, SQYEQLAE…	593	59510.51,	0.470489	4.87551	29	5515,5882,8544,30280,	231	578	122	61	225	382	446	739	497	263	195	294	635	64	220	726
Keratin, type II cytoskeletal 5,	KRT5,	IPI00009867,	ENSP00000252242,	NP_000415,	P13647,	DVDAAYMNK, EYQELMNTK, FASFIDKVR, GLGVGFGSGGGSSSSVK, ISISTSGGSFR, LAELEEALQK, LALDVEIATYR, LALDVEIATYRK, NKLAELEEALQK, NKYEDEINKR, NLDLDSIIAEVK, QLDSIVGER, QNLEPLFEQYINNLR, SFSTASAITPSVSR, TTAENEFVMLK, VDALMDEINFMK, WTLLQEQGTK, YEELQQTAGR	590	62377.985,	0.308475	7.90961	18	5200,5515,5882,8544,	45	103	20	42	38	63	58	113	119	30	48	58	125	20	30	151
Epoxide hydrolase 1,	EPHX1,	IPI00009896,	ENSP00000272167,ENSP00000355802,	NP_000111,	P07099,	DVELLYPVK, GGHFAAFEEPELLAQDIR, PLLMVHGWPGSFYEFYK	455	52948.48,	0.0967033	7.27888	3	4301,5783,5792,6805,9636,16020,16021,16787,19439,							3		2
SRA stem-loop-interacting RNA-binding protein, mitochondrial precursor,	C14orf156,	IPI00009922,	ENSP00000238688,	NP_112487,	Q9GZT3,	GLGWVQFSSEEGLR, IPWTAASSQLK, NALQQENHIIDGVK, SINQPVAFVR	109	12348.93,	0.449541	10.9978	4	166,3723,5739,6350,6355,		3	2		6	5	3		4			3				3
Isoform 1 of 28S ribosomal protein S11, mitochondrial precursor,Isoform 2 of 28S ribosomal protein S11, mitochondrial precursor,	MRPS11,	IPI00010244,IPI00219350,	ENSP00000317376,	NP_073750,	P82912-1,P82912-2,	FSIYPPIPGEESSLR, GTGIAAQTAGIAAAAR, KFEEIPIAHIK, KGTGIAAQTAGIAAAAR	194, 193	20615.605,20459.42,	0.222224	11.4242	4	3735,5622,5739,5763,5840,6412,42769,	6	5			6			2	3	3		4	2			5
Isoform A of Ras-related C3 botulinum toxin substrate 1 precursor,Isoform B of Ras-related C3 botulinum toxin substrate 1 precursor,Uncharacterized protein ENSP00000309219,ras-related C3 botulinum toxin substrate 1 isoform Rac1c,	RAC1,	IPI00010271,IPI00219675,IPI00394837,IPI00749222,	ENSP00000258737,ENSP00000309219,ENSP00000348461,	NP_008839,NP_061485,NP_942126,	P63000-1,P63000-2,	KLTPITYPQGLAMAK, LTPITYPQGLAMAK	192, 211, 148, 200	21449.895,23467.15,16796.565,22295.845,	0.0813916	9.00979	2	5525,5622,5624,5737,6897,6954,6972,7010,7155,7264,9653,16020,16023,16358,16477,19897,30027,30032,30041,30838,31529,35025,43552,48261,	4						3			10			5
Isoform 1 of NAD-dependent deacetylase sirtuin-5,Isoform 2 of NAD-dependent deacetylase sirtuin-5,	SIRT5,	IPI00010331,IPI00016807,	ENSP00000368552,ENSP00000368564,	NP_036373,NP_112534,	Q9NXA8-1,Q9NXA8-2,	GAPEPGTQDASIPVEK, GVPVAEFNTETTPATNR, NLLEIHGSLFK, RVVVITQNIDELHR, VVVITQNIDELHR	299, 310	32673.41,33880.605,	0.190538	8.86243	5	3677,3950,5677,6342,6355,6471,8270,16787,46872,	3	3		2	3		2	3	6	2			2		5
Biglycan precursor,Uncharacterized protein BGN,	BGN,	IPI00010790,IPI00643384,	ENSP00000327336,ENSP00000342318,ENSP00000359223,	NP_001702,	P21810,	EISPDTTLLDLQNNDISELRK, IQAIELEDLLR	368, 307	41653.665,34875.19,	0.0955955	8.36137	2	5515,5578,8150,30133,															3
Protein disulfide-isomerase precursor,	P4HB,	IPI00010796,	ENSP00000327801,	NP_000909,	P07237,	EADDIVNWLK, ENLLDFIK, HNQLPLVIEFTEQTAPK, IKPHLMSQELPEDWDKQPVK, ILEFFGLK, KSNFAEALAAHK, LGETYKDHENIVIAK, LITLEEEMTK, MDSTANEVEAVK, NFEDVAFDEKK, NNFEGEVTKENLLDFIK, SNFAEALAAHK, TGPAATTLPDGAAAESLVESSEVAVIGFFK, THILLFLPK, VDATEESDLAQQYGVR, YKPESEELTAER, YQLDKDGVVLFK	508	57115.795,	0.415354	4.49022	17	3756,4656,5515,5576,5783,5792,5793,6457,9986,16020,16853,18401,45454,	11	23	38	13	14	5	33	17	9	14	2	25	26	10	31	21
Electron transfer flavoprotein subunit alpha, mitochondrial precursor,	ETFA,	IPI00010810,	ENSP00000267950,	NP_000117,	P13804,	AAVDAGFVPNDMQVGQTGK, ASSTSPVEISEWLDQK, DPEAPIFQVADYGIVADLFK, GLLPEELTPLILATQK, GTSFDAAATSGGSASSEK, IVAPELYIAVGISGAIQHLAGMK, IVAPELYIAVGISGAIQHLAGMKDSK, LEVAPISDIIAIK, LLYDLADQLHAAVGASR, SPDTFVR, TIVAINKDPEAPIFQVADYGIVADLFK, VLVAQHDVYK, VVPEMTEILK	333	35079.19,	0.537538	8.56869	13	5739,5759,6118,6810,9055,50660,	134	162	137	136	162	87	113	161	133	99	92	109	124	111	131	114
NADH dehydrogenase [ubiquinone] iron-sulfur protein 8, mitochondrial precursor,	NDUFS8,	IPI00010845,	ENSP00000315774,	NP_002487,	O00217,	EPATINYPFEK, GLGMTLSYLFR, TLLWTELFR, YVNMQDPEMDMK	210	23704.795,	0.204762	6.26866	4	3954,5506,5739,5747,6120,6979,8137,32981,46872,51539,	112	132	103	95	185	64	102	119	135	139	52	136	90	49	84	103
Isocitrate dehydrogenase [NADP], mitochondrial precursor,	IDH2,	IPI00011107,	ENSP00000331897,	NP_002159,	P48735,	ATDFVADR, DIFQEIFDK, DIFQEIFDKHYK, DLAGCIHGLSNVK, DQTDDQVTIDSALATQK, EKLILPHVDIQLK, FAQMLEK, FKDIFQEIFDK, FKDIFQEIFDKHYK, GKLDGNQDLIR, GRPTSTNPIASIFAWTR, IIWQFIK, LDGNQDLIR, LIDDMVAQVLK, LILPHVDIQLK, LNEHFLNTTDFLDTIK, LVPGWTKPITIGR, NILGGTVFR, NILGGTVFREPIICK, PTSTNPIASIFAWTR, PVVEMDGDEMTR, TIEAEAAHGTVTR, VAKPVVEMDGDEMTR, VCVETVESGAMTK, YFDLGLPNR, YFDLGLPNRDQTDDQVTIDSALATQK	452	50908.915,	0.469027	8.95225	26	287,4450,5739,5743,5975,6097,6099,8152,16491,16616,30145,	491	580	801	568	682	283	431	533	713	359	565	584	739	665	802	499
NAD-dependent malic enzyme, mitochondrial precursor,	ME2,	IPI00011201,	ENSP00000321070,	NP_002387,	P23368,	ALTSQLTDEELAQGR, HISDSVFLEAAK, IETQDIQALR, ILGLGDLGVYGMGIPVGK, NTLIQFEDFGNHNAFR	584	65442.945,	0.121575	7.67241	5	4471,5739,6108,9055,16619,46872,51287,		2	3				2						3		4	2
NADH dehydrogenase [ubiquinone] iron-sulfur protein 4, mitochondrial precursor,	NDUFS4,	IPI00011217,	ENSP00000296684,ENSP00000370825,	NP_002486,	O43181,	EDAVSFAEK, LDITTLTGVPEEHIK, MEFDTR, NGWSYDIEER, SYGANFSWNK, SYGANFSWNKR, WENPLMGWASTADPLSNMVLTFSTK	175	20107.84,	0.434286	11.0167	7	1932,3954,5739,5747,6120,6800,7420,8137,16020,19933,32981,45333,48146,51591,	21	52	16	43	58	14	23	14	53	29		26	22	22
Cathepsin D precursor,	CTSD,	IPI00011229,	ENSP00000236671,ENSP00000371435,	NP_001900,	P07339,	DPDAQPGGELMLGGTDSK, FDGILGMAYPR, ISVNNVLPVFDNLMQQK, LSPEDYTLK, LVDQNIFSFYLSR, QPGITFIAAK, QVFGEATKQPGITFIAAK, VSTLPAITLK	412	44551.845,	0.23301	6.50461	8	4192,4194,5576,5739,5764,6508,8233,	14	25	18	17	27	19	36	17	20	14	6	26	28	11	14	22
40S ribosomal protein S3,	RPS3,	IPI00011253,	ENSP00000278572,	NP_000996,	P23396,	AELNEFLTR, ELAEDGYSGVEVR, FGFPEGSVELYAEK, FVDGLMIHSGDPVNYYVDTAVR, TEIIILATR	243	26688.13,	0.27572	10.2555	5	3723,3735,5515,5622,5737,5840,5843,6412,		4	2							3		2			2
Delta(3,5)-Delta(2,4)-dienoyl-CoA isomerase, mitochondrial precursor,	ECH1,	IPI00011416,	ENSP00000221418,	NP_001389,	Q13011,	DHSVAESLNYVASWNMSMLQTQDLVK, EVDVGLAADVGTLQR, HVLHVQLNRPNK, HVLHVQLNRPNKR, ISWYLR, KMMADEALGSGLVSR, LTGSSAQEEASGVALGEAPDHSYESLR, MFTAGIDLMDMASDILQPK, MMADEALGSGLVSR, VFPDKEVMLDAALALAAEISSK, VIGNQSLVNELAFTAR, VNLLYSR, YQETFNVIER	328	35815.805,	0.536585	8.11923	13	4300,5739,5777,6091,6629,6631,6635,16853,	178	218	123	114	280	119	185	153	185	215	98	157	178	83	110	165
Isoform 1 of Cat eye syndrome critical region protein 5 precursor,Isoform 2 of Cat eye syndrome critical region protein 5 precursor,	CECR5,	IPI00011511,IPI00299177,	ENSP00000155674,ENSP00000337358,	NP_060299,NP_149061,	Q9BXW7-1,Q9BXW7-2,	IEGVLLLGEPVR, LYAVGDNPMSDVYGANLFHQYLQK, MAFPLLDMVDLER, NPQSTEPVLGGGEPPFHGHR, PSILTYQYAEDLIR, VPVVFVTNAGNILQHSK	423, 393	46321.1,43587.91,	0.24543	7.56167	6	8152,16787,	6	10	11	7	12	6	11	10	12	2		8	6	8	9	10
Calsequestrin 1,Calsequestrin-1 precursor,	CASQ1,	IPI00011525,IPI00843888,	ENSP00000357057,ENSP00000357058,	NP_001222,	P31415,	AFEDAAEEFHPYIPFFATFDSK, ELQAFENIEDEIK, GVGFGLVDSEK, GVGFGLVDSEKDAAVAK, GVGFGLVDSEKDAAVAKK, KLGLTEVDSMYVFK, KYEVLALLYHEPPEDDK, KYEVLALLYHEPPEDDKASQR, LGLTEVDSMYVFK, QFEMEELILELAAQVLEDK, YEVLALLYHEPPEDDK, YEVLALLYHEPPEDDKASQR	396, 390	45159.635,44497.915,	0.269736	3.76682	12	5509,5739,5759,5790,16529,	431	537	455	266	224	248	376	310	386	457	260	485	499	251	601	357
Tubulin beta chain,Tubulin, beta,Tubulin, beta polypeptide,	TUBB,	IPI00011654,IPI00645452,IPI00647896,	ENSP00000259925,ENSP00000339001,ENSP00000365578,ENSP00000373058,	NP_821133,	P07437,	ISEQFTAMFR, MAVTFIGNSTAIQELFK	444, 426, 372	49670.515,47766.335,41741.755,	0.0655906	4.49774	2	166,3924,5198,5525,5737,5856,5874,7018,43234,51258,													3
NADH dehydrogenase [ubiquinone] 1 alpha subcomplex subunit 4,	NDUFA4,	IPI00011770,	ENSP00000339720,	NP_002480,	O00483,	FYSVNVDYSK, LGPNDQYK, LGPNDQYKFYSVNVDYSK	81	9369.78,	0.222222	9.83456	3	3954,5739,5747,6120,8137,16020,16491,		12	57	25	82	19	51	46	10		14	53	46	19	64	39
Peroxiredoxin-4,Protein,	PRDX4,	IPI00011937,IPI00639945,	ENSP00000368646,	NP_006397,	Q13162,	DYGVYLEDSGHTLR, IPLLSDLTHQISK, QITLNDLPVGR	271, 161	30539.6,18214.455,	0.188123	6.17533	3	5737,7252,16209,16491,		2	4						2			2			4
Cofilin-1,	CFL1,	IPI00012011,	ENSP00000309629,	NP_005498,	P23528,	EILVGDVGQTVDDPYATFVK, LGGSAVISLEGKPL	166	18502.315,	0.204819	8.28815	2	3779,5515,5622,5634,5737,5856,6916,7266,30036,													3
24 kDa protein,Isoform A of Decorin precursor,	DCN,	IPI00012119,IPI00795042,	ENSP00000052754,	NP_001911,NP_598010,	P07585-1,	DLPPDTTLLDLQNNK, NLHALILVNNK, SSGIENGAFQGMK, VSPGAFTPLVK	359, 217	39746.43,24277.05,	0.184845	8.35461	4	5515,5578,9887,	5									2					13
Transmembrane protein 177,	TMEM177,	IPI00012251,	ENSP00000272521,	NP_085054,	Q53S58,	LLSGNLALR, LYTPSGNIVPR	311	33759.69,	0.0643087	9.91454	2	16020,16021,					2							2
38 kDa protein,TatD DNAse domain-containing protein 1,	TATDN1,	IPI00012463,IPI00795107,	ENSP00000276692,	NP_114415,		DEDPLELANTLYNNTIK, HQDDLQDVIGR	297, 333	33601.38,37650.03,	0.0891801	7.43597	2	0,													3
Isoform Sap-mu-0 of Proactivator polypeptide precursor,Isoform Sap-mu-9 of Proactivator polypeptide precursor,Prosaposin,	PSAP,	IPI00012503,IPI00219825,IPI00744835,	ENSP00000350063,ENSP00000362212,	NP_001035930,NP_001035931,NP_002769,	P07602-1,P07602-2,P07602-3,	EIVDSYLPVILDIIK, QEILAALEK	524, 559, 527	58112.135,61692.21,58483.49,	0.0447587	4.82184	2	4098,4336,4348,4557,4565,4767,5615,5764,6629,6687,6869,7040,8047,8289,16021,									3
Isoform 1 of Long-chain-fatty-acid--CoA ligase 1,	ACSL1,	IPI00012728,	ENSP00000281455,	NP_001986,	P33121-1,	AELSLVFVDKPEK, DSGLKPFEQVK, GITLHPELFSIDNGLLTPTMK, GPNVFQGYLK, GPNVFQGYLKDPAK, IFGQANTTLK, IFGQANTTLKR, IGFFQGDIR, IIVVMDAYGSELVER, KPDQPYEWLSYK, LAQGEYIAPEK, LLLEGVENK, LMVTGAAPVSATVLTFLR, MPELVDFR, SQIDDLYSTIK, SQIDDLYSTIKV, TAEALDKDGWLHTGDIGK, VLQPTVFPVVPR, WLLDFASK	698	77942.685,	0.289398	7.16	19	287,4467,5739,5777,5783,5792,6629,6631,7586,8152,16020,16021,16874,	34	96	81	79	100	14	69	65	47	66	31	84	131	57	102	90
40S ribosomal protein S25,Uncharacterized protein ENSP00000340469,Uncharacterized protein ENSP00000352086,	RPS25,hCG_1640785,	IPI00012750,IPI00401105,IPI00478694,	ENSP00000236900,ENSP00000340469,ENSP00000352086,	NP_001019,NP_001083058,	P62851,	AALQELLSK, DKLNNLVLFDK, LITPAVVSER, LNNLVLFDK	125, 124, 124	13742.01,13613.795,13587.835,	0.24129	10.8333	4	3723,3735,5843,6412,30529,	3	7	3			3			5	8		3
3-ketoacyl-CoA thiolase, peroxisomal precursor,	ACAA1,	IPI00012828,	ENSP00000333664,	NP_001598,	P09110,	AEELGLPILGVLR, QVITLLNELK	424	44291.575,	0.0542453	8.55058	2	3988,5777,6091,6629,6631,8415,16740,													3
Carnitine O-palmitoyltransferase 2, mitochondrial precursor,	CPT2,	IPI00012912,	ENSP00000287862,ENSP00000360541,	NP_000089,	P23786,	AGLLEPEVFHLNPAK, ALEDMFDALEGK, DGSTAVHFEHSWGDGVAVLR, DSTQTPAVTPQSQPATTDSTVTVQK, DSVVLNFNPFMAFNPDPK, GNFYIFDVLDQDGNIVSPSEIQAHLK, KGNFYIFDVLDQDGNIVSPSEIQAHLK, LMSSGNEESLR, LNFELTDALK, LSPDAVAQLAFQMAFLR, TETIRPASVYTK, YILSDSSPAPEFPLAYLTSENR, YLSAQKPLLNDGQFR	658	73776.335,	0.31003	8.30267	13	4095,5739,5743,6629,6631,6635,6810,8415,16020,16740,	6	12	20	16	30	4	12	8	11	11		20	22	14	9	5
Mitochondrial 28S ribosomal protein S22,	MRPS22,	IPI00013146,	ENSP00000310785,	NP_064576,	P82650,	DLIDDATNLVQLYHVLHPDGQSAQGAK, DQAAEGINLIK, IDGLLIDQIQR, LMTQAQLEEATR, TFKPAIQELKPPTYK, VPINDVLAEDK, VPINDVLAEDKILEGTETTK, YVFTDISYSIPHR	360	41280.035,	0.302778	8.07228	8	3674,5515,5739,5761,8150,30529,	4	5	7	3	5		3	2	7	10		6	3	3	8	3
Mitochondrial 28S ribosomal protein S25,	MRPS25,	IPI00013167,	ENSP00000253686,	NP_071942,	P82663,	FVFFNIPQIQYK, KFVFFNIPQIQYK, NPWVQIMMFK, TLQYLSQGNVVFK, VMTVNYNTHGELGEGAR	173	20116.3,	0.306358	9.14392	5	3735,5739,5763,6412,30529,	2	5			3		2		7	3		4
Mitochondrial 39S ribosomal protein L49,	MRPL49,	IPI00013195,	ENSP00000279242,	NP_004918,	Q13405,	DVEDFLSPLLGK, FVESVDEYQFVER, TPVTQVNEVTGTLR	166	19197.945,	0.23494	9.8688	3	3674,3735,5575,5622,5739,5840,6412,	8	4	4	3	4	3	2	3	4	7	2	5	3		5	3
40S ribosomal protein S18,	RPS18,	IPI00013296,	ENSP00000211372,ENSP00000363762,	NP_072045,	P62269,	AGELTEDEVER, IAFAITAIK, IPDWFLNR, VITIMQNPR, YSQVLANGLDNK	152	17718.565,	0.322368	11.605	5	3735,5622,5737,5840,5843,6412,19843,	4	23	12		6	2	7		16	12		9		9	10	2
18 kDa protein,40S ribosomal protein S7,	RPS7,	IPI00013415,IPI00796554,	ENSP00000339095,	NP_001002,	P62081,	AIIIFVPVPQLK, DVNFEFPEFQL	194, 159	22126.695,18137.07,	0.131605	10.9795	2	3735,5622,5730,5840,5843,6412,	3						3			5		5
22 kDa protein,NADH dehydrogenase [ubiquinone] 1 beta subcomplex subunit 5, mitochondrial precursor,	NDUFB5,	IPI00013459,IPI00791036,	ENSP00000259037,	NP_002483,	O43674,	GDGPWYYYETIDK, GDGPWYYYETIDKELIDHSPK, LFVIRPSR, TMAVLQIEAEK, TMAVLQIEAEKAELR, VKELEVR	189, 187	21750.05,21564.86,	0.271284	10.0217	6	3954,5739,5747,6120,8137,16020,16491,	77	80	41	54	90	44	60	61	74	79	31	51	43	14	30	50
Actinin alpha 1 isoform b,Alpha-actinin-1,Alpha-actinin-2,Alpha-actinin-3,Uncharacterized protein ACTN3,	ACTN1,ACTN2,ACTN3,	IPI00013508,IPI00019884,IPI00032137,IPI00759776,IPI00784158,	ENSP00000193403,ENSP00000355537,ENSP00000366035,ENSP00000374659,	NP_001093,NP_001094,NP_001095,	P12814,P35609,Q08043,	AGTQIENIEEDFR, FAIQDISVEETSAK	892, 894, 901, 914, 286	103056.695,103852.885,103293.46,105567.635,32253.725,	0.0428766	5.20047	2	3779,5509,5515,5856,5884,5925,6936,8307,30018,30035,30175,31143,42803,42981,43197,48041,51289,												3
metaxin 1 isoform 1,	MTX1,	IPI00013678,	ENSP00000357360,	NP_002446,	Q13505,	ISNPWQSPSGTLPALR, LQLLTGEHRPEDEEELEKELYR, QGADTLAFMSLLEEK	466	51476.385,	0.113734	10.2307	3	5515,5739,5743,15031,16020,16021,19867,			2										2
Isoform 3 of Ecto-ADP-ribosyltransferase 3 precursor,	ART3,	IPI00013682,	ENSP00000348064,		Q13508-1,	IPEPFPLPEDK, TSQGTSFTFGGLNQAR	389	43922.97,	0.0694087	5.97183	2	3950,3956,5887,6471,16020,16757,48503,												2
Acid ceramidase precursor,	ASAH1,	IPI00013698,	ENSP00000262097,ENSP00000371168,	NP_808592,	Q13510,	DAMWIGFLTR, ESLDVYELDAK, LPGLLGNFPGPFEEEMK, LTVYTTLIDVTK, TSQENISFETMYDVLSTKPVLNK	395	44649.27,	0.18481	7.7057	5	5764,6631,6672,16787,17040,	2	6	5	6	13		11	9	5	6		10	2		4	9
39S ribosomal protein L20, mitochondrial precursor,	MRPL20,	IPI00013706,	ENSP00000341082,	NP_060441,	Q9BYC9,	HEGFAAALGDGKEPEGIFSR, VLADLAIYEPK, YPALIGNLVK	149	17442.41,	0.275168	11.4602	3	3723,3735,5622,5739,5762,5840,6412,	6	6			7		4	6	3	6		4	3		5	7
Ubiquinol-cytochrome-c reductase complex core protein 1, mitochondrial precursor,	UQCRC1,	IPI00013847,	ENSP00000203407,	NP_003356,	P31930,	ADLTEYLSTHYK, AVELLGDIVQNCSLEDSQIEK, AVELLGDIVQNCSLEDSQIEKER, DVVFNYLHATAFQGTPLAQAVEGPSENVR, DVVFNYLHATAFQGTPLAQAVEGPSENVRK, EHTAYYIK, EMQENDASMR, EVESMGAHLNAYSTR, FETEKNNGAGYFLEHLAFK, IAEVDASVVR, IDDMMFVLQGQWMR, IPLAEWESR, MKIDDMMFVLQGQWMR, MVLAAAGGVEHQQLLDLAQK, NALVSHLDGTTPVCEDIGR, NNGAGYFLEHLAFK, RIPLAEWESR, SGMFWLR, SLLTYGR	480	52645.305,	0.429167	6.32196	19	4222,5515,5739,5746,6118,6119,6508,6810,8121,8270,9060,16020,16491,	186	162	164	134	223	111	162	154	183	135	143	188	220	107	173	157
3-hydroxyisobutyrate dehydrogenase, mitochondrial precursor,	HIBADH,	IPI00013860,	ENSP00000265395,	NP_689953,	P31937,	DFSSVFQFLR, DFSSVFQFLREEETF, DLGLAQDSATSTK, EFQDAGEQVVSSPADVAEK, GSLLIDSSTIDPAVSK, IITMLPTSINAIEAYSGANGILK, IITMLPTSINAIEAYSGANGILKK, KDFSSVFQFLR, KDFSSVFQFLREEETF, KGSLLIDSSTIDPAVSK, MGAVFMDAPVSGGVGAAR, SPILLGSLAHQIYR, TPVGFIGLGNMGNPMAK	336	35328.515,	0.410714	8.25552	13	4616,5739,6098,6573,8442,16491,51287,	127	146	159	94	126	120	102	131	137	97	65	146	121	112	150	133
Isoform DPI of Desmoplakin,	DSP,	IPI00013933,	ENSP00000369129,	NP_004406,	P15924-1,	AELIVQPELK, ALLQAILQTEDMLK, GFFDPNTEENLTYLQLK, GYFNEELSEILSDPSDDTK, IEVLEEELR, ITNLTQQLEQASIVK, LLEAQIATGGIIDPK, SVQNDSQAIAEVLNQLK, TLELQGLINDLQR, TMIQSPSGVILQEAADVHAR	2871	331771.16,	0.0518983	6.78308	10	1533,5200,5737,5882,5913,8544,18149,30216,30674,		4		3					6				12			5
Mitochondrial carnitine/acylcarnitine carrier protein,	SLC25A20,	IPI00013957,	ENSP00000326305,	NP_000378,	O43772,	DVPASGMYFMTYEWLK, ELIRDEGVTSLYK, FLNWATPNL, FQTAPPGKYPNGFR, GFNAVMIR, GTVLTLMR, KLYQEFGIR, LYQEFGIR	301	32943.46,	0.255814	9.83609	8	5215,5319,5488,5739,5743,6810,16020,16021,	8	7	5	4	3	3	7	8	17	8		6	5	6	5	4
Isoform 1 of Tropomyosin beta chain,	TPM2,	IPI00013991,	ENSP00000354219,	NP_003280,	P07951-1,	IQLVEEELDR, KLVILEGELER, LVILEGELER, TIDDLEDEVYAQK	284	32850.405,	0.119718	4.35579	4	3779,5737,5856,5862,8307,		1	12				2	2	2	5		2		2	7
Isoform 1 of Probable mitochondrial import receptor subunit TOM40 homolog,	TOMM40,	IPI00014053,	ENSP00000252487,	NP_006105,	O96008-1,	GSVDSNWIVGATLEK, KLPPLPLTLALGAFLNHR, LPPLPLTLALGAFLNHR, MQDTSVSFGYQLDLPK, QLSPTEAFPVLVGDMDNSGSLNAQVIHQLGPGLR, RPGEEGTVMSLAGK	361	37892.86,	0.268698	7.28882	6	3674,5739,5741,6626,6820,8308,15031,16020,16021,19867,	2	3					3	4	3			3	4			2
Complement component 1 Q subcomponent-binding protein, mitochondrial precursor,	C1QBP,	IPI00014230,	ENSP00000225698,	NP_001203,	Q07021,	AFVDFLSDEIK, AFVDFLSDEIKEER, EVSFQSTGESEWK, MSGGWELELNGTEAK, VEEQEPELTSTPNFVVEVIK	282	31361.935,	0.219858	4.46932	5	5515,5739,5759,5886,6955,	26	38	38	38	36	21	25	25	30	32	18	37	31	41	46	27
Dihydropteridine reductase,	QDPR,	IPI00014439,	ENSP00000281243,ENSP00000371717,	NP_000311,	P09417,	AALDGTPGMIGYGMAK, EGGLLTLAGAK, MTDSFTEQADQVTAEVGK, NRPSSGSLIQVVTTEGR, NSGMPPGAAAIAVLPVTLDTPMNR	244	25789.295,	0.352459	7.45352	5	4155,5737,6520,6559,6729,8152,9055,51066,	4		4	4	6	2	4			3		5		2	2
Isoform 1 of Tropomyosin alpha-1 chain,Isoform 4 of Tropomyosin alpha-1 chain,	TPM1,	IPI00014581,IPI00296039,	ENSP00000288398,	NP_000357,NP_001018005,	P09493-1,P09493-4,	AISEELDHALNDMTSI, GTEDELDKYSEALKDAQEK, KLVIIESDLER, QLEDELVSLQK, SIDDLEDELYAQK	284, 284	32708.175,32847.445,	0.246479	4.3955	5	3779,5737,5856,5862,6928,6937,8016,8307,	2	1	7				2		4	3		1		1	4
[Pyruvate dehydrogenase [lipoamide]] kinase isozyme 2, mitochondrial precursor,	PDK2,	IPI00014832,	ENSP00000007708,	NP_002602,	Q15119,	ATVESHESSLILPPIK, TLSQFTDALVTIR, VMVALGEEDLSIK	454	51135.925,	0.092511	7.92926	3	4673,4740,5515,5524,5739,5975,6006,16310,18106,	3		3				3	3	2				3		3
Isoform 1 of Plectin-1,Isoform 4 of Plectin-1,plectin 1 isoform 1,plectin 1 isoform 10,plectin 1 isoform 2,plectin 1 isoform 3,plectin 1 isoform 6,plectin 1 isoform 7,plectin 1 isoform 8,	PLEC1,	IPI00014898,IPI00186711,IPI00398002,IPI00398775,IPI00398776,IPI00398777,IPI00398778,IPI00398779,IPI00420096,	ENSP00000323856,ENSP00000344848,ENSP00000346602,ENSP00000347044,ENSP00000348702,ENSP00000349868,ENSP00000350277,	NP_000436,NP_958780,NP_958781,NP_958782,NP_958783,NP_958784,NP_958785,NP_958786,	Q15149-1,Q15149-2,Q15149-3,Q15149-4,	HISDLYEDLR, LQNVQIALDYLR	4684, 4684, 4574, 4533, 4515, 4547, 4551, 4547, 4525	531727.835,531785.925,518467.785,514769.93,512599.67,516271.75,516473.98,516163.54,513701.77,	0.00481135	5.551	2	3779,5200,5737,5856,5882,5886,7016,8307,										3
Creatine kinase, sarcomeric mitochondrial precursor,	CKMT2,	IPI00015141,	ENSP00000254035,ENSP00000312588,	NP_001093205,NP_001093206,NP_001816,	P17540,	EVENVAITALEGLK, EVENVAITALEGLKGDLAGR, GIWHNYDK, GQDIKVPPPLPQFGK, GTGGVDTAAVADVYDISNIDR, GWEFMWNER, HTTDLDASK, HTTDLDASKITQGQFDEHYVLSSR, ITQGQFDEHYVLSSR, LFPPSADYPDLR, LFPPSADYPDLRK, LGYILTCPSNLGTGLR, LIDDHFLFDK, LIDDHFLFDKPVSPLLTCAGMAR, LSEMTEQDQQR, REVENVAITALEGLK, RGTGGVDTAAVADVYDISNIDR, SEVELVQIVIDGVNYLVDCEK, TFLIWINEEDHTR, TVGMVAGDEESYEVFADLFDPVIK, VPPPLPQFGK, VPPPLPQFGKK, VTPNGYTLDQCIQTGVDNP…	419	47504.08,	0.587112	8.30684	23	166,4111,5524,5739,6091,6936,16020,	272	294	327	242	350	149	235	338	347	172	219	259	235	203	296	279
Ras-related protein Rap-1b precursor,	RAP1B,	IPI00015148,	ENSP00000250559,	NP_001010942,NP_056461,	P61224,	INVNEIFYDLVR, LVVLGSGGVGK, SALTVQFVQGIFVEK, VKDTDDVPMILVGNK	184	20824.665,	0.288044	5.39222	4	166,5525,5622,5737,7264,16020,	2								6	4	6		11
Coiled-coil-helix-coiled-coil-helix domain-containing protein 3,	CHCHD3,	IPI00015833,	ENSP00000262570,	NP_060282,	Q9NX63,	LSENVIDR, RVAEELALEQAK, RVAEELALEQAKK, RVTFEADENENITVVK, VAEELALEQAK, VAEELALEQAKK, VTFEADENENITVVK, YSGAYGASVSDEELK, YSGAYGASVSDEELKR	227	26152.15,	0.23348	8.45274	9	5515,5739,5743,	41	53	55	31	43	19	39	25	51	51	14	54	39	23	50	33
Dihydrolipoyl dehydrogenase, mitochondrial precursor,	DLD,	IPI00015911,	ENSP00000205402,	NP_000099,	P09622,	ADGGTQVIDTK, ALTGGIAHLFK, EANLAASFGK, FPFAANSR, GIEMSEVR, IDVSIEAASGGK, IPNIYAIGDVVAGPMLAHK, LGADVTAVEFLGHVGGVGIDMEISK, MVVIGAGVIGVELGSVWQR, NLGLEELGIELDPR, SDGKIDVSIEAASGGK, SEEQLKEEGIEYK, TNADTDGMVK, VGKFPFAANSR	509	54149.84,	0.328094	7.75788	14	4148,5737,5739,6118,16491,45454,50660,	118	114	123	99	159	63	113	127	117	90	66	121	113	87	132	121
Cytochrome c oxidase polypeptide VIc precursor,	COX6C,	IPI00015972,	ENSP00000297564,	NP_004365,	P09669,	AGIFQSVK, APEVLPKPR, AYADFYR, KAGIFQSVK, KAYADFYR, NYDVMKDFEEMR, NYDVMKDFEEMRK	75	8781.36,	0.506667	10.9784	7	4129,5739,6118,16020,16021,16491,	40	63	260	147	238	37	140	146	79	36	15	168	116	48	212	149
Protein NipSnap2,	GBAS,	IPI00016077,	ENSP00000313050,	NP_001474,	O75323,	ENKEFLEFR, FRQDGNEAVGGFFSQIGQLYMVHHLWAYR, HGWEELVYYTVPLIQEMESR, KDAHSNLLAK, KNQLLLEFSFWNEPVPR, PGTMIEWGNYWAR, QDGNEAVGGFFSQIGQLYMVHHLWAYR, SDMLLSR, SGPNIYELR, SREDSWLK, SYQLRPGTMIEWGNYWAR, YEGGYPALTEVMNK	286	33742.385,	0.493007	9.74152	12	5624,5739,5887,	118	165	185	112	200	93	126	87	156	123	62	172	103	75	157	112
Isoform 1 of OCIA domain-containing protein 1,Isoform 2 of OCIA domain-containing protein 1,OCIA domain containing 1 isoform 2,	OCIAD1,	IPI00016405,IPI00816371,IPI00816523,	ENSP00000264312,ENSP00000370882,	NP_001073308,NP_001073309,NP_001073310,NP_001073311,NP_060300,	Q9NX40-1,Q9NX40-2,	LENSPLGEALR, SVPLAATSMLITQGLISK	245, 187, 194	27625.89,20718.23,21592.195,	0.140977	7.56674	2	0,	12	7	9	4	22				8				13	4	7
Isoform 1 of Carnitine O-acetyltransferase,Isoform 2 of Carnitine O-acetyltransferase,	CRAT,	IPI00016457,IPI00514595,	ENSP00000315013,	NP_000746,NP_003994,	P43155-1,P43155-2,	ALQPIVSEEEWAHTK, AYNTLIK, EPVGILTSNHR, IWNSSLQTNK, IWNSSLQTNKEPVGILTSNHR, KTENWLSEWWLK, LIEGVLDFK, LPVPPLQQSLDHYLK, LQAIEDLVSMPDIFMDTSYAIAMHFHLSTSQVPAK, LSPDAFIQMALQLAYYR, QDFVDLQGQLR, QLVDEFQASGGVGER, QPVVIYSSPGVMLPK, SASMDSLTFVK, SHVAGQMLHGGGSR, TENWLSEWWLK, VMIDNETLPVEYLGGK	626, 605	70925.155,68636.32,	0.346161	8.41843	17	4092,5739,5777,5783,6629,6637,6810,8415,15980,16020,16740,	55	60	67	78	75	36	50	54	76	46	54	27	109	45	55	70
Isoform 1 of L-2-hydroxyglutarate dehydrogenase, mitochondrial precursor,	L2HGDH,	IPI00016458,	ENSP00000267436,	NP_079160,	Q9H9P8-1,	AQALDRDGNLVEDFVFDAGVGDIGNR, DGNLVEDFVFDAGVGDIGNR, DLAVHQTGHNSGVIHSGIYYKPESLK, EGYRPFDFSATDVMDIIINSGLIK, FIPEITISDILR, FPFLGVHFTPR, GDYLLLKPEK, HPSLSIGVLEK, LASQNFSYGVTEMYK, LIVAVEQEEIPR, MDGSIWLGPNAVLAFK, NAPSPAATSSIAISGMIADEVQQR, QVALSFAQDFQEAGGSVLTNFEVK, SIDGMQYPIVIK	463	50358.61,	0.481642	8.34245	14	5739,6118,16021,16491,31305,44267,47545,	10	18	13	7	4	3	14	10	12	6	8	8	18	7	17	14
Ras-related protein Rab-10,	RAB10,	IPI00016513,	ENSP00000264710,ENSP00000370062,	NP_057215,	P61026,	AFLTLAEDILR, GAMGIMLVYDITNGK, LQIWDTAGQER	200	22540.745,	0.185	8.61141	3	166,5515,5525,5794,7264,15031,16020,		5							5	8
Glutamate dehydrogenase 1, mitochondrial precursor,	GLUD1,	IPI00016801,	ENSP00000277865,	NP_005262,	P00367,	ALASLMTYK, DDGSWEVIEGYR, DIVHSGLAYTMER, DSNYHLLMSVQESLER, GFIGPGIDVPAPDMSTGER, HGGTIPIVPTAEFQDR, IIAEGANGPTTPEADK, IIAEGANGPTTPEADKIFLER, TAAYVNAIEK, YNLGLDLR, YSTDVSVDEVK	558	61397.315,	0.241935	7.90902	11	166,4352,4353,5524,5525,5739,6520,6538,7169,16491,	6	12	13	7	10	2	14	7	12	4		7	9		10	9
Isoform Cytoplasmic of Glutathione reductase, mitochondrial precursor,Isoform Mitochondrial of Glutathione reductase, mitochondrial precursor,	GSR,	IPI00016862,IPI00759575,	ENSP00000221130,	NP_000628,	P00390-1,P00390-2,	ADFDNTVAIHPTSSEELVTLR, ALLTPVAIAAGR	522, 479	56256.565,51700.22,	0.066056	8.21577	2	4362,5737,5739,6118,6749,45454,50660,50661,														2
Isoleucyl-tRNA synthetase, mitochondrial precursor,	IARS2,	IPI00017283,	ENSP00000303279,ENSP00000355889,	NP_060530,	Q9NSE4,	ELSNFYFSIIK, FLINLEGGDIR, QWFINITDIK, SLGNVIHPDVVVNGGQDQSK, TALAEAELEYNPEHVSR, TKDEYLINSQTTEHIVK	1012	113790.565,	0.0849802	7.19939	6	166,4822,5524,5737,5739,6428,8270,16874,	2		2		3							3			4
Prohibitin,	PHB,	IPI00017334,	ENSP00000300408,	NP_002625,	P35232,	AAELIANSLATAGDGLIELR, AAIISAEGDSK, AATFGLILDDVSLTHLTFGK, DLQNVNITLR, FDAGELITQR, FGLALAVAGGVVNSALYNVDAGHR, GVQDIVVGEGTHFLIPWVQK, IFTSIGEDYDER, ILFRPVASQLPR, KLEAAEDIAYQLSR, LEAAEDIAYQLSR, NITYLPAGQSVLLQLPQ, PVASQLPR, QVSDDLTER, VLPSITTEILK	272	29803.775,	0.698529	5.45988	15	74,5515,5634,5654,5739,5743,5887,6260,7165,8285,16020,16481,16563,16564,16575,42981,	103	108	97	106	147	90	113	90	114	106	74	139	111	78	110	96
Radixin,	RDX,	IPI00017367,	ENSP00000342830,	NP_002897,	P35241,	APDFVFYAPR, FFPEDVSEELIQEITQR, IAQDLEMYGVNYFEIK, IGFPWSEIR	583	68563.48,	0.0891938	6.29675	4	3779,5198,5488,5737,5886,5902,7016,15629,19898,30033,45176,51016,		3	4				3		4			3			3
Sepiapterin reductase,	SPR,	IPI00017469,	ENSP00000234454,	NP_003115,	P35270,	DMLFQVLALEEPNVR, LLLINNAGSLGDVSK, LLSLLEKDEFK, TLAPLLASLLSPGSVLVLSAR, VLNYAPGPLDTDMQQLAR, VPADLGAEAGLQQLLGALR	261	28048.13,	0.37931	8.19442	6	4033,4757,5737,6118,6729,6809,8152,16491,50661,	6	4	9	3	9	2	12	8	7	6	2	9	10	4	5	5
Cytochrome c oxidase subunit 2,	MTCO2,	IPI00017510,	ENSP00000354876,	AP_000642,NP_536846,	P00403,	IFEMGPVFTL, ILYMTDEVNDPSLTIK, LLDVDNR, LLDVDNRVVLPIEAPIR, LNQTTFTATR, MMITSQDVLHSWAVPTLGLK, VVLPIEAPIR	227	25564.73,	0.321586	4.43874	7	4129,5507,5739,5746,6123,6810,16020,16021,16491,46872,	330	326	198	219	360	151	218	193	308	278	140	260	219	141	110	189
Leucine zipper-EF-hand-containing transmembrane protein 1, mitochondrial precursor,	LETM1,	IPI00017592,	ENSP00000305653,ENSP00000354784,	NP_036450,	O95202,	FLQDTIEEMALK, LIAEEGVDSLNVK, LLELQSIGTNNFLR, STLQTLPEIVAK	739	83353.39,	0.0690122	6.66035	4	5509,5739,5743,5887,7165,7275,16020,	3				3		3	3					2			2
Isoform 1 of 3-hydroxyacyl-CoA dehydrogenase type-2,	HSD17B10,	IPI00017726,	ENSP00000168216,	NP_004484,	Q99714-1,	DLAPIGIR, DVQTALALAK, GGIVGMTLPIAR, GLVAVITGGASGLGLATAER, GQTHTLEDFQR, GVIINTASVAAFEGQVGQAAYSASK, KGQTHTLEDFQR, LGDPAEYAHLVQAIIENPFLNGEVIR, LVAGEMGQNEPDQGGQR, LVGQGASAVLLDLPNSGGEAQAK, VLDVNLMGTFNVIR, VMTIAPGLFGTPLLTSLPEK	261	26922.87,	0.716475	7.93684	12	3857,5515,5737,5739,5886,6629,8152,8709,16491,47015,	68	58	51	50	90	49	58	49	60	62	18	83	61	35	51	43
Thioredoxin, mitochondrial precursor,	TXN2,	IPI00017799,	ENSP00000216185,	NP_036605,	Q99757,	DEDQLEAFLK, FVGIKDEDQLEAFLK, FVGIKDEDQLEAFLKK	197	21824.99,	0.0812183	8.75235	3	5739,6118,6662,6810,9055,15035,30508,45454,	3	3			8		5	2	4			7	5			2
Isoform 1 of Methylglutaconyl-CoA hydratase, mitochondrial precursor,	AUH,	IPI00017802,	ENSP00000364883,	NP_001689,	Q13825-1,	AVGLISHVLEQNQEGDAAYR, AVGLISHVLEQNQEGDAAYRK, DRLEGLLAFK, EFLPQGPVAMR, GIVVLGINR, LEGLLAFK, MSSSEVGPFVSK	339	35608.18,	0.185841	10.0753	7	3723,3730,4300,4490,5739,6402,8152,9083,16829,	9	11	8	8	9		6	3	12	3		6		2	5	3
ATP synthase subunit s, mitochondrial precursor,	ATP5S,	IPI00017816,	ENSP00000245448,	NP_001003803,	Q99766,	DYNHLPTGPLDK, EKENLVQAFK, LSQLENLQK, TALPSLELK, YLLLSDLPGVR	215	24881.77,	0.237209	7.62528	5	5739,6811,15078,15992,45263,	17	12	13	13	10	5	9	6	14	18		7	6	7	10	8
Aconitase 2, mitochondrial,Aconitate hydratase, mitochondrial precursor,	ACO2,	IPI00017855,IPI00790739,	ENSP00000216254,	NP_001089,	Q99798,	AKDINQEVYNFLATAGAK, DGYAQILR, DINQEVYNFLATAGAK, DLEDLQILIK, DSSGQHVDVSPTSQR, EDIANLADEFK, EGWPLDIR, FNPETDYLTGTDGK, FNPETDYLTGTDGKK, FRLEAPDADELPK, FRLEAPDADELPKGEFDPGQDTYQHPPK, GEFDPGQDTYQHPPK, GHLDNISNNLLIGAINIENGK, HPNGTQETILLNHTFNETQIEWFR, IHPVDKLTIQGLK, IVYGHLDDPASQEIER, KQGLLPLTFADPADYNK, LEAPDADELPK, LEAPDADELPKGEFDPGQDTYQHPPK, LNRPLTLSEK, LQLLEPFDK, LQLLEPFDKWDGK, LQLLEPFDKWDGKDLEDLQILIK,…	780, 805	85424.745,87819.29,	0.473304	7.5176	37	3994,5739,6099,6101,8152,16829,51539,	305	288	305	423	499	177	296	465	363	219	230	373	443	311	390	466
Isoform 1 of Glycerol-3-phosphate dehydrogenase, mitochondrial precursor,	GPD2,	IPI00017895,	ENSP00000308610,	NP_000399,NP_001076581,	P43304-1,	ANLLEIAPHLSAPLPIMLPVYK, DKLVGAIVYYDGQHNDAR, DVLTGQEFDVR, DWSPTLYIR, GFITIVDVQR, LAFLNVQAAEEALPR, LVQDYGLESEVAQHLAATYGDK, LVSEFPYIEAEVK, MNLAIALTAAR, MTIAGTTDTPTDVTHHPIPSEEDINFILNEVR, NGQVELNEFLQLMSAIQK, NHVVDISESGLITIAGGK, SEISLLPSDIDR, SMAEDTINAAVK, TALVERDDFSSGTSSR, TVGLFLQGGK, VIFFLPWQK, VLESINVQMDENTLHEILNEVDLNK, YGAATANYMEVVSLLK	727	80832.95,	0.411279	7.58223	19	4368,5509,5739,5743,6007,6072,6094,6118,9331,16491,	10	23	33	19	28	8	16	20	15	25	14	41	54	35	47	36
Surfeit 1,Surfeit locus protein 1,	SURF1,	IPI00018034,IPI00642942,	ENSP00000361042,	NP_003163,	Q15526,	LNLIAELESR, VLAEPVPLPADPMELK	300, 270	33331.145,30257.435,	0.0914815	9.71423	2	4129,5739,5746,6118,8535,9060,16020,16021,	4		4			2	4		4	3			5		4
Mitochondrial 28S ribosomal protein S29,	DAP3,	IPI00018120,	ENSP00000341692,ENSP00000357320,	NP_004623,NP_387506,	P51398,	EDKSPIAPEELALVHNLR, EGFDALDPFIPILVSNYNPK, ELLFLSNANPSLLER, FDQPLEASTWLK, GSPLGEVVEQGITR, KAYLPQELLGK, KPALELLHYLK, NATDAVGIVLK, SPIAPEELALVHNLR	398	45566.105,	0.281407	9.22128	9	5739,5761,6915,8624,8637,15935,30529,	4	4	5	7	7		4		3			6	3		4	3
Aspartate aminotransferase, mitochondrial precursor,	GOT2,	IPI00018206,	ENSP00000245206,	NP_002071,	P00505,	ASAELALGENSEVLK, DAGMQLQGYR, DDNGKPYVLPSVR, EFSIYMTK, EYLPIGGLAEFCK, FVTVQTISGTGALR, IAAAILNTPDLR, IAAAILNTPDLRK, IGASFLQR, ILIRPMYSNPPLNGAR, ISVAGVTSSNVGYLAHAIHQVTK, KAEAQIAAK, KMNLGVGAYR, KQWLQEVK, MNLGVGAYR, MNLGVGAYRDDNGKPYVLPSVR, NLDKEYLPIGGLAEFCK, NLFAFFDMAYQGFASGDGDK, NLFAFFDMAYQGFASGDGDKDAWAVR, NMGLYGER, PMYSNPPLNGAR, PTWGNHTPIFR, QWLQEVK, TCGFDFTGAVEDISK, TQLVSNLK, TQLVSNLKK, VGAFTMVCKDA…	430	47475.205,	0.576744	9.37656	28	4069,5739,6520,6533,9058,30170,	383	423	460	413	449	153	322	264	416	174	163	477	310	276	484	271
Isoform 1 of Hexokinase-1,Isoform 2 of Hexokinase-1,Isoform 3 of Hexokinase-1,Isoform 4 of Hexokinase-1,	HK1,	IPI00018246,IPI00220663,IPI00220665,IPI00220667,	ENSP00000298649,ENSP00000348697,ENSP00000352398,ENSP00000353433,	NP_000179,NP_277031,NP_277032,NP_277033,NP_277035,	P19367-1,P19367-2,P19367-3,P19367-4,	FLSQIESDR, GDFIALDLGGSSFR, GKFNTSDVSAIEK, IDEAILITWTK, LVDEYSLNAGK, MISGMYLGEIVR, MVSGMYLGELVR, QIEETLAHFHLTK, SANLVAATLGAILNR, TPDGTENGDFLALDLGGTNFR	917, 916, 921, 905	102485.1,102200.645,102737.3,101103.52,	0.143215	6.76314	10	166,4396,5524,5739,6096,16020,16301,16740,	6	2	8	5	11		6	8	9	4		15	17	7	15	9
15 kDa protein,Histone H2A.Z,Histone H2AV,	H2AFV,H2AFZ,	IPI00018278,IPI00218448,IPI00555841,	ENSP00000296417,ENSP00000308405,ENSP00000370516,	NP_002097,NP_036544,	P0C0S5,Q71UI9,	AGLQFPVGR, ATIAGGGVIPHIHK, GDEELDSLIK, HLQLAIR	128, 128, 150	13508.575,13552.635,15487.645,	0.297222	11.3299	4	786,3677,5634,5694,6334,7001,	119	16	150	88	8	6	16	20	21	42	1	17	9	64	80	19
Adenylate kinase 1,Adenylate kinase isoenzyme 1,	AK1,	IPI00018342,IPI00640817,	ENSP00000223836,ENSP00000362249,ENSP00000362271,	NP_000467,	P00568,	GQLVPLETVLDMLR, IIFVVGGPGSGK, YGYTHLSTGDLLR	194, 210	21634.725,23410.615,	0.193373	8.92023	3	4017,5524,5737,5739,5829,5886,6139,7050,16301,16740,46034,		5							4	7		6	4			5
H2B histone family, member A,Histone H2B type 1-D,Histone H2B type 1-H,Histone H2B type 1-L,Histone H2B type 1-M,Histone H2B type 2-F,Histone H2B.d,	HIST1H2BC,HIST1H2BD,HIST1H2BE,HIST1H2BF,HIST1H2BG,HIST1H2BH,HIST1H2BI,HIST1H2BL,HIST1H2BM,HIST1H2BN,HIST2H2BF,	IPI00018534,IPI00020101,IPI00152906,IPI00303133,IPI00329665,IPI00554798,IPI00794461,	ENSP00000289316,ENSP00000303408,ENSP00000321744,ENSP00000330559,ENSP00000342886,ENSP00000348531,ENSP00000348706,ENSP00000348924,ENSP00000352156,ENSP00000352442,ENSP00000353074,ENSP00000358164,ENSP00000366574,ENSP00000366585,ENSP00000366618,ENSP00000366962,ENSP00000366994,ENSP00000367008,	NP_001019770,NP_003509,NP_003510,NP_003511,NP_003512,NP_003513,NP_003514,NP_003515,NP_003516,NP_003517,NP_066407,NP_619790,	P58876,P62807,Q5QNW6,Q93079,Q99877,Q99879,Q99880,	HAVSEGTKAVTKYTSSK, KESYSVYVYK, QVHPDTGISSK	126, 126, 126, 126, 126, 126, 166	13952.095,13906.035,13936.065,13892.005,13920.065,13989.175,18803.735,	0.291206	11.0368	3	786,3677,5515,5634,5694,6334,7001,42742,			3	3			1	1				1	1	2	1	1
Protein COQ10 B, mitochondrial precursor,	COQ10B,	IPI00018628,	ENSP00000263960,	NP_079423,	Q9H8M1,	FSPGLPGYPR, LEIGFPPVLER, LFNHLETIWR, YTSVVTLVKPHLVK	238	27070.315,	0.189076	10.0327	4	5739,	7	9			3		3	2	11	8	1	2	2			1
ADP-ribosylation factor-like protein 8B,	ARL8B,	IPI00018871,	ENSP00000256496,ENSP00000373353,	NP_060654,	Q9NVJ2,	GVNAIVYMIDAADR, GVNAIVYMIDAADREK, NELHNLLDKPQLQGIPVLVLGNK, NELHNLLDKPQLQGIPVLVLGNKR	186	21538.815,	0.215054	8.62428	4	166,3924,5525,5622,5737,5764,5768,7059,7264,16020,19003,30496,43014,48487,51233,		4			2	4			5	1		5	5
FLJ10769 protein,		IPI00018942,				LSQALGNVTVVQK, STTTSDMIAEVGAAFSK	347	36575.67,	0.0864553	8.16275	2	0,																2
Uncharacterized protein C7orf44,	C7orf44,	IPI00018966,IPI00414548,	ENSP00000223336,ENSP00000312100,	NP_060694,	Q9GZY4,	LAVEQLQSHPEAQEALGPPLNIHYLK, LIDRENFVDIVDAK	145, 146	16518.83,16694.145,	0.274917	9.21575	2	16020,16021,									2	2
RAP1A, member of RAS oncogene family,Ras-related protein Rap-1A precursor,	RAP1A,	IPI00019345,IPI00640287,	ENSP00000348786,ENSP00000358723,	NP_001010935,NP_002875,	P62834,	VKDTEDVPMILVGNK	184, 184	20987.055,20953.035,	0.0815217	6.54797	1	166,5525,5622,7049,7165,7264,16020,45786,	1									1
Isoform 1 of Acylglycerol kinase, mitochondrial precursor,	AGK,	IPI00019353,	ENSP00000347581,	NP_060708,	Q53H12-1,	GETVPLDVLQIK, IPIGFIPLGETSSLSHTLFAESGNK	422	47136.765,	0.0876777	8.20892	2	166,1729,4143,5524,5739,7205,16020,16740,46834,47620,					3				3
Keratin, type I cytoskeletal 9,	KRT9,	IPI00019359,	ENSP00000246662,	NP_000217,	P35527,	DIENQYETQITQIEHEVSSSGQEVQSSAK, DQIVDLTVGNNK, EIETYHNLLEGGQEDFESSGAGK, FEMEQNLR, FSSSSGYGGGSSR, GGGGSFGYSYGGGSGGGFSASSLGGGFGGGSR, GGSGGSHGGGSGFGGESGGSYGGGEEASGSGGGYGGGSGK, GGSGGSYGGGGSGGGYGGGSGSR, HGVQELEIELQSQLSK, HGVQELEIELQSQLSKK, IKFEMEQNLR, KDIENQYETQITQIEHEVSSSGQEVQSSAK, LASYLDKVQALEEANNDLENK, LEKEIETYHNLLEGGQEDFESSGAGK, MTLDDFR, NHKEEMSQLTGQNSGDVNVEINVAPGK, NHKEEMSQLTGQNSGDVNVEINVAPGKDLTK, …	623	62129.4,	0.598716	4.94897	30	5200,5515,5882,8544,	168	282	155	255	158	233	257	443	587	133	132	242	490	18	130	453
Protein,Translocon-associated protein delta subunit precursor,Uncharacterized protein SSR4,	SSR4,	IPI00019385,IPI00646864,IPI00647421,	ENSP00000317331,ENSP00000359102,ENSP00000359103,ENSP00000359104,	NP_006271,	P51571,	FFDEESYSLLR, NNEDISIIPPLFTVSVDHR	184, 120, 148	20212.755,12958.56,16245.305,	0.205249	6.25973	2	5783,5784,16020,16021,		2										2
Myosin-9,	MYH9,	IPI00019502,	ENSP00000216181,	NP_002464,	P35579,	DFSALESQLQDTQELLQEENR, LQQELDDLLVDLDHQR	1960	226530.505,	0.0188775	5.28925	2	146,166,910,1525,1725,1726,5516,5524,5634,5737,5826,5829,5886,6509,7229,7605,8305,8360,15031,16459,16887,30048,30220,30224,31532,32154,42803,43495,43534,50900,51015,													2
Succinate semialdehyde dehydrogenase, mitochondrial precursor,aldehyde dehydrogenase 5A1 precursor, isoform 1,	ALDH5A1,	IPI00019888,IPI00336008,	ENSP00000314649,ENSP00000350191,	NP_001071,NP_733936,	P51649,	IITAESGKPLK, ILLHHAANSVK, ISFTGSTTTGK, LAGLSAALLR, RVYGDIIHTPAK, VGNGFEEGTTQGPLINEK, VSMELGGLAPFIVFDSANVDQAVAGAMASK, VYGDIIHTPAK, YGIDEYLELK	535, 548	57214.23,58652.895,	0.20871	8.26458	9	4777,5739,6118,7417,8152,9450,16491,42135,	21	35	40	11	37	8	47	21	20	5	5	9	27	19	28	32
Coiled-coil domain-containing protein 44,	CCDC44,	IPI00019903,	ENSP00000258975,	NP_057444,	Q9BSH4,	ALEMAIEAGAEDVKETEDEEER, ALEMAIEAGAEDVKETEDEEERNVFK, GPGGSSLLIEALSNSSHK, SKDTYLLYEGR	297	32476.75,	0.185185	8.23843	4	3677,5739,8270,8907,15074,	10	6			6	2	3		5	6		8			7
46 kDa protein,Isoform 1 of Basigin precursor,Isoform 2 of Basigin precursor,	BSG,	IPI00019906,IPI00218019,IPI00795150,	ENSP00000333769,ENSP00000343809,	NP_001719,NP_940991,	P35613-1,P35613-2,	FFVSSSQGR, GGVVLKEDALPGQK, GSDQAIITLR, SELHIENLNMEADPGQYR	269, 385, 432	29220.71,42200.06,46400.075,	0.146705	6.62233	4	5515,5529,5537,7166,16020,16021,		4	3				4		3	3		3	3		3	3
Peroxisomal multifunctional enzyme type 2,	HSD17B4,	IPI00019912,	ENSP00000256216,	NP_000405,	P51659,	GALVVVNDLGGDFK, IDVVVNNAGILR, LGLLGLANSLAIEGR, VAVAIPNRPPDAVLTDTTSLNQAALYR, VVLVTGAGAGLGR	736	79685.715,	0.110054	9.20658	5	3857,4303,5498,5515,5739,5777,6629,6631,8152,15248,16491,16829,16853,		2	3		5		2	2					2
Protein NipSnap3B,	NIPSNAP3B,	IPI00020035,	ENSP00000363894,	NP_060846,	Q9BS92,	AINAHVNLGYTK, EGVYELAVFQMK, EGVYELAVFQMKPGGPALWGDAFER, ESVNYLVSQQNMLLIPASFSPLK, EWQEQSIIPNLAR, IDKQETEITYLIPWSK, PGGPALWGDAFER, QYDGTFYEFR, TYYLKPSNMNAFMENLK, VVGVFHTEYGELNR	247	28313.18,	0.526316	9.68316	10	0,	41	56	30	29	60	36	31	27	49	50	27	42	22	22	29	14
Abhydrolase domain-containing protein 10, mitochondrial precursor,	ABHD10,	IPI00020075,	ENSP00000273359,	NP_060864,	Q9NUJ1,	ADIQLLVYTIDDLIDK, EKADIQLLVYTIDDLIDK, FDYSGVGSSDGNSEESTLGK, FNQLPVELK, FNQLPVELKK, TSLSFLNRPDLPNLAYK, VLSTDVDVILR, VVALIGVATAADTLVTK, YSEEGVYNVQYSFIK	306	33932.165,	0.352941	8.77166	9	4252,5739,6725,8233,	11	11	8	6	12	9	9	5	14	11		13	6	3	5	9
Dysferlin_v1,	DYSF,	IPI00020210,	ENSP00000258104,	NP_003485,	O75923,	AEDLPQMDDAVMDNVK, ALGRPGPPFNITPR, DLAAMDKDSFSDPYAIVSFLHQSQK, DSFSDPYAIVSFLHQSQK, DVILDDLSLTGEK, EANIYMVPQNIKPALQR, EFTGFPDPYTELNTGK, GSQPSGELLASFELIQR, IETQNQLLGIADR, IGETVVDLENR, IPNPHLGPVEER, ITLYDYDLLSK, ITLYDYDLLSKDEK, KLLSDKPQDFQIR, KLPSRPPPHYPGIK, LALHVLQQQGLVPEHVESR, LALHVLQQQGLVPEHVESRPLYSPLQPDIEQGK, LALVGNWGTTGLTYPK, LEAGLEQVHLALK, LEMTLEIVAESEHEERPAGQGR, LLSDKPQDFQIR, LSVFAETYENETK, LTH…	2081	237379.04,	0.225853	5.53108	36	1778,5515,6936,16021,42383,	11	26	22	13	13	7	37	30	38	61	3	42	39	11	48	40
Isoform 1 of Transmembrane protein 111,Isoform 2 of Transmembrane protein 111,	TMEM111,	IPI00020472,IPI00607849,	ENSP00000245046,ENSP00000373321,	NP_060917,	Q9P0I2-1,Q9P0I2-2,	LTQEQVSDSQVLIR, SIYSLILGQDNAADQSR	261, 219	29951.76,24915.18,	0.130163	8.55357	2	16020,16021,												2
Mitochondrial 28S ribosomal protein S36,	MRPS36,	IPI00020495,	ENSP00000256441,	NP_150597,	P82909,	DNPKPNVSEALR, KLVSQEEMEFIQR, LVSQEEMEFIQR, SAGLPSHSSVISQHSK, SPDLLMYQGPPDTAEIIK, VVQVVKPHTPLIR	103	11466.12,	0.699029	10.6539	6	3735,5739,5763,6412,30529,	14	13	10	31	18	10	25	21	25	10	5	22	12	6	10	14
CDGSH iron sulfur domain-containing protein 1,	CISD1,	IPI00020510,	ENSP00000363041,	NP_060934,	Q9NZ45,	AMINLHIQK, HNEETGDNVGPLIIK, IVHAFDMEDLGDK	108	12198.955,	0.342593	9.50249	3	5739,8270,46872,	40	74	34	65	64	25	44	49	48	35	9	52	37	36	35	49
Thioesterase superfamily member 2,	THEM2,	IPI00020530,	ENSP00000230048,	NP_060943,	Q9NPJ3,	GAPGVSVDMNITYMSPAK, ITLVSAAPGK, LGEDIVITAHVLK, TLAFTSVDLTNK	140	14960.385,	0.378571	9.7347	4	5739,16787,	14	33	12	18	21	13	23	13	22	20	9	27	18	16	11	15
37 kDa protein,Calreticulin precursor,	CALR,	IPI00020599,IPI00793605,	ENSP00000320866,	NP_004334,	P27797,	EQFLDGDGWTSR, FYALSASFEPFSNK, FYGDEEKDKGLQTSQDAR, GQTLVVQFTVK, IDNSQVESGSLEDDWDFLPPKK	417, 322	48141.2,36702.285,	0.211891	4.17914	5	5509,5578,5737,5783,5788,5829,6355,6457,6611,6874,42981,51082,							4					5	5		3	2
Transcription factor A, mitochondrial precursor,	TFAM,	IPI00020928,	ENSP00000363006,	NP_003192,	Q00059,	AEWQVYKEEISR, ELTLLGKPK, EQLTPSQIMSLEK, FKEQLTPSQIMSLEK, NLSDSEKELYIQHAK, SAYNVYVAER	246	29096.385,	0.247968	10.3194	6	3700,5739,6261,6350,6356,6390,	9	13	12	10	7	7	9	7	11	12		12	6	6	12	6
Calnexin precursor,	CANX,	IPI00020984,	ENSP00000247461,	NP_001019820,NP_001737,	P27824,	APVPTGEVYFADSFDR, GTLSGWILSK, IPNPDFFEDLEPFR, KIPNPDFFEDLEPFR, TPELNLDQFHDK	592	67567.695,	0.089527	4.20688	5	1525,5509,5529,5737,5783,6457,9306,16020,16021,51082,	2		5							2			6		5	4
Isoform 1 of Elongation factor Ts, mitochondrial precursor,	TSFM,	IPI00021016,	ENSP00000242983,		P43897-1,	EGSLKDQLALAIGK, GFLNSSELSGLPAGPDR, LGQHVVGMAPLSVGSLDDEPGGEAETK, VPSGFYVGSYVHGAMQSPSLHK	325	35390.42,	0.246154	8.55667	4	3711,3746,5622,5739,6414,	5	7	6	5	6		7	4	5	4		6	7	6	6
Keratin, type II cytoskeletal 2 epidermal,	KRT2,	IPI00021304,	ENSP00000310861,	NP_000414,	P35908,	AQYEEIAQR, DVDNAYMIK, DYQELMNVK, EIKIEISELNR, FLEQQNQVLQTK, GFSSGSAVVSGGSR, GGGFGGGSGFGGGSGFGGGSGFSGGGFGGGGFGGGR, GGSGGGGSISGGGYGSGGGSGGR, GSSSGGGYSSGSSSYGSGGR, HGDSLKEIKIEISELNR, HGGGGGGFGGGGFGSR, IEISELNR, LNDLEEALQQAK, MSGDLSSNVTVSVTSSTISSNVASK, NKLNDLEEALQQAK, NKLNDLEEALQQAKEDLAR, NVQDAIADAEQR, NVQDAIADAEQRGEHALK, SISISVAGGGGGFGAAGGFGGR, SKEEAEALYHSK, TAAENDFVTLK, TAAENDFVTLKK, TSQNSELNNMQDLV…	645	65865.1,	0.556589	8.17386	28	5200,5515,5882,8544,31424,32980,43616,51546,	193	308	97	92	146	229	272	513	293	199	123	226	317	90	115	348
Dihydrolipoamide S-acetyltransferase (E2 component of pyruvate dehydrogenase complex) variant,Dihydrolipoyllysine-residue acetyltransferase component of pyruvate dehydrogenase complex, mitochondrial precursor,	DLAT,	IPI00021338,IPI00604707,	ENSP00000280346,	NP_001922,	P10515,	DIDSFVPSK, GIDLTQVK, GVETIANDVVSLATK, ILVAEGTR, ISVNDFIIK, KDIDSFVPSK, KYLEKPITMLL, LQPHEFQGGTFTISNLGMFGIK, VAPAPAAVVPPTGPGMAPVPTGVFTDIPISNIR, VPEANSSWMDTVIR, VPLPSLSPTMQAGTIAR, VVDGAVGAQWLAEFR, YLEKPITMLL	614, 647	65780.405,68996.03,	0.257115	6.94578	13	4742,5515,5739,5967,6090,8152,8415,16740,31405,45254,	99	104	102	118	148	65	111	85	109	76	50	157	131	63	90	91
Alpha-crystallin B chain,	CRYAB,	IPI00021369,	ENSP00000227251,	NP_001876,	P02511,	FSVNLDVK, IPADVDPLTITSSLSSDGVLTVNGPR, RPFFPFHSPSR	175	20158.71,	0.257143	7.37779	3	5212,5625,5626,5634,5737,5886,6457,6916,6936,7169,7517,7601,30018,32387,43292,51082,		4
Actin, alpha skeletal muscle,	ACTA1,	IPI00021428,	ENSP00000355645,	NP_001091,	P68133,	AGFAGDDAPR, AVFPSIVGRPR, DLTDYLMK, DLYANNVMSGGTTMYPGIADR, EITALAPSTMK, GYSFVTTAER, HQGVMVGMGQK, HQGVMVGMGQKDSYVGDEAQSKR, IWHHTFYNELR, MQKEITALAPSTMK, QEYDEAGPSIVHR, SYELPDGQVITIGNER, TTGIVLDSGDGVTHNVPIYEGYALPHAIMR, VAPEEHPTLLTEAPLNPK	377	42050.67,	0.490716	5.05026	14	166,1725,5200,5515,5524,5737,5856,5865,5884,6936,17022,30240,43531,48741,		34	37	20		8	27	15	41	20	16	31	33	44	59	16
Actin, cytoplasmic 1,Actin, cytoplasmic 2,	ACTB,ACTG1,PSPHL,	IPI00021439,IPI00021440,IPI00848058,	ENSP00000331514,ENSP00000349960,	NP_001092,NP_001605,	P60709,P63261,	DLYANTVLSGGTTMYPGIADR, GYSFTTTAER, QEYDESGPSIVHR, TTGIVMDSGDGVTHTVPIYEGYALPHAILR, VAPEEHPVLLTEAPLNPK	375, 375, 404	41736.37,41792.48,45085.365,	0.239463	5.48331	5	166,5198,5515,5524,5625,5737,5829,5856,6928,7605,15629,30016,45214,		3	9	3		1	2				7		21	10	7	2
Calmodulin-like protein 5,	CALML5,	IPI00021536,	ENSP00000315372,ENSP00000369689,	NP_059118,	Q9NZT1,	AFSAVDTDGNGTINAQELGAALK, AGLEDLQVAFR	146	15920.365,	0.232877	4.05278	2	5509,5515,7165,8544,													2
Cytochrome c oxidase subunit 5B, mitochondrial precursor,	COX5B,	IPI00021785,	ENSP00000258424,	NP_001853,	P10606,	EDPNLVPSISNK, EDPNLVPSISNKR, GASGTREDPNLVPSISNK, GLDPYNVLAPK, KGLDPYNVLAPK, LVPQQLAH, SMASGGGVPTDEEQATGLER	129	13695.57,	0.457364	9.00421	7	4129,5739,5740,6118,7585,8270,16020,16491,46872,	73	75	69	106	103	41	52	57	77	45	24	69	47	54	62	50
Lysosomal protective protein precursor,cathepsin A precursor,	CTSA,	IPI00021794,IPI00640525,	ENSP00000191018,ENSP00000346952,ENSP00000361549,ENSP00000361562,	NP_000299,	P10619,	EFSHIAFLTIK, YGDSGEQIAGFVK	480, 498	54465.655,56232.555,	0.0490964	6.59422	2	4185,5764,5783,6508,6886,8047,8233,													3
Apolipoprotein A-I precursor,	APOA1,	IPI00021841,	ENSP00000236850,ENSP00000352471,ENSP00000364469,ENSP00000364472,ENSP00000364478,	NP_000030,	P02647,	DLATVYVDVLK, DSGRDYVSQFEGSALGK, DYVSQFEGSALGK, EQLGPVTQEFWDNLEK, LLDNWDSVTSTFSK, LREQLGPVTQEFWDNLEK, QGLLPVLESFK, THLAPYSDELR, VKDLATVYVDVLK, VSFLSALEEYTK	267	30777.58,	0.359551	5.50143	10	5319,5515,5576,5615,6629,6869,8015,8035,8202,8203,8289,30300,30301,42157,		17	2	6	8	3	15	5	9	13	10	20	17	7	12	12
Estradiol 17-beta-dehydrogenase 8,Uncharacterized protein ENSP00000372558,	HSD17B8,	IPI00021890,IPI00747151,	ENSP00000230236,ENSP00000363794,ENSP00000372558,	NP_055049,	Q92506,	AGVIGLTQTAAR, GNHAAFQADVSEAR, GSIINISSIVGK, LRSALALVTGAGSGIGR, SALALVTGAGSGIGR, VGNVGQTNYAASK	261, 231	26973.56,23940.23,	0.277454	7.44669	6	5575,5624,5739,5740,5886,6703,8152,8209,16491,50327,	10	16	17	12	15	6	10	9	23	8		5		17	19	11
Isoform Gamma-A of Fibrinogen gamma chain precursor,Isoform Gamma-B of Fibrinogen gamma chain precursor,Putative uncharacterized protein DKFZp779N0926,	FGG,	IPI00021891,IPI00219713,IPI00411626,	ENSP00000336829,ENSP00000341469,	NP_000500,NP_068656,	P02679-1,P02679-2,	IHLISTQSAIPYALR, YEASILTHDSSIR	453, 437, 406	51511.29,49496.2,45942.355,	0.0649496	5.88946	2	5102,5577,7165,30168,30674,51258,													2
Carnitine O-palmitoyltransferase I, muscle isoform,	CPT1B,	IPI00021925,	ENSP00000353945,	NP_004368,NP_689451,NP_689452,	Q92523,	ALLDIADLFQVPK, DTDVLQHLSDSR, ILDDPSPPQPGEEK, IPGKDTDVLQHLSDSR, KALLDIADLFQVPK, LLKPQDLEMQFQR, LSTSQIPQSQIR, SFTLISFK, SPLMVNSNYYVMDLVLIK, TSPDAFVQIALQLAHFR, YLESVRPLLDDEEYYR, YLGVSSPFLAEVLSEPWR	843	95368.89,	0.173191	8.9615	12	4095,5739,6629,6631,6635,6810,8415,16020,16021,16740,19867,	10	11	17	17	24	6	12	17	10	3		8	16	3	11	11
Mitochondrial 28S ribosomal protein S27,	MRPS27,	IPI00022002,	ENSP00000261413,ENSP00000370025,	NP_055899,	Q92552,	IESEGLLSLTTQLVK, NFGASLLLPGLK	414	47668.975,	0.0652174	5.89007	2	5739,30529,	3	2	3		2		2					2	2			2
Isoform 2 of Collagen alpha-3(VI) chain precursor,alpha 3 type VI collagen isoform 1 precursor,alpha 3 type VI collagen isoform 3 precursor,alpha 3 type VI collagen isoform 4 precursor,	COL6A3,	IPI00022200,IPI00072917,IPI00072918,IPI00220701,	ENSP00000295546,ENSP00000295550,ENSP00000315609,ENSP00000315873,	NP_004360,NP_476506,NP_476507,NP_476508,	P12111-1,P12111-2,	ALILVGLER, IEDGVPQHLVLVLGGK, SQAPVLDAIR, VGVVQFSNDVFPEFYLK	3177, 2977, 2976, 2971	343666.71,321998.45,322184.345,321350.05,	0.0172026	6.98438	4	4867,5578,5589,5737,6817,7155,7517,		4								4		3			2
31 kDa protein,CDNA FLJ90278 fis, clone NT2RP1000325, highly similar to Phosphate carrier protein, mitochondrialprecursor,Isoform A of Phosphate carrier protein, mitochondrial precursor,Isoform B of Phosphate carrier protein, mitochondrial precursor,	SLC25A3,	IPI00022202,IPI00215777,IPI00788624,IPI00790115,	ENSP00000188376,ENSP00000228318,	NP_002626,NP_005879,NP_998776,	Q00325-1,Q00325-2,	EKGSSASLVLK, EKGSSASLVLKR, FGFYEVFK, FVVPKPR, GIFNGFSVTLK, GIFNGFSVTLKEDGVR, GSSASLVLK, GSSASLVLKR, GVAPLWMR, IQTQPGYANTLR, LPRPPPPEMPESLK, LPRPPPPEMPESLKK, MYKEEGLK, QIPYTMMK, TVEALYK, VLYSNMLGEENTYLWR	362, 361, 272, 361	40094.525,39958.38,30522.705,39932.3,	0.350388	9.81127	16	5215,5488,5739,5743,5887,6810,16020,16021,	167	189	198	136	176	55	120	116	205	145	51	145	136	99	219	86
20 kDa protein,Mitochondrial 28S ribosomal protein S28,Mitochondrial ribosomal protein S28 variant,	MRPS28,	IPI00022276,IPI00791486,IPI00795922,	ENSP00000276585,	NP_054737,	Q9Y2Q9,	AGGFASALER, FLGATTDTTVLEANAVLLGIQESK, LLDLELTSR, NVESFASMLR	187, 181, 192	20842.6,20147.77,21381.205,	0.284094	9.62014	4	3723,5739,5763,8150,30529,	4	6	4		3	3	3	2	6	3		6	4			3
Coiled-coil domain-containing protein 56,	CCDC56,	IPI00022277,	ENSP00000354762,	NP_001035521,	Q9Y2R0,	FLDELEDEAK, RGEAPFAQR	106	11731.145,	0.179245	10.0417	2	5739,16020,16021,						2
Superoxide dismutase [Mn], mitochondrial precursor,manganese superoxide dismutase isoform A precursor,	SOD2,	IPI00022314,IPI00847322,	ENSP00000337127,ENSP00000356022,	NP_000627,NP_001019636,	P04179,	AIWNVINWENVTER, DFGSFDK, DFGSFDKFK, FNGGGHINHSIFWTNLSPNGGGEPK, GDVTAQIALQPALK, GELLEAIK, GELLEAIKR, HHAAYVNNLNVTEEK, HHAAYVNNLNVTEEKYQEALAK, HSLPDLPYDYGALEPHINAQIMQLHHSK, LTAASVGVQGSGWGWLGFNK, NVRPDYLK, YQEALAK	222, 222	24721.955,24750.015,	0.671171	8.44911	13	1315,4784,5739,5743,6357,6801,6979,16491,46872,	242	203	245	185	241	115	190	191	223	224	86	169	101	153	228	139
28S ribosomal protein S18b, mitochondrial precursor,	MRPS18B,	IPI00022316,	ENSP00000259873,	NP_054765,	Q9Y676,	APSEEDSLSSVPISPYKDEPWK, DHGLLIYHIPQVEPR, LYQGHLQEESGPPPESMPK	258	29395.355,	0.217054	9.73737	3	3735,5622,5739,5763,5840,6412,	2		2												2
Band 3 anion transport protein,Solute carrier family 4 anion exchanger member 1 variant,	SLC4A1,	IPI00022361,IPI00791534,	ENSP00000262418,	NP_000333,	P02730,	ADFLEQPVLGFVR, ASTPGAAAQIQEVK, ATFDEEEGRDEYDEVAMPV, FLFVLLGPEAPHIDYTQLGR, GTVLLDLQETSLAGVANQLLDR, GWVIHPLGLR, HSHAGELEALGGVKPAVLTR, IFQDHPLQK, IPPDSEATLVLVGR, LQEAAELEAVELPVPIR, STPASLALPFVLILTVPLR, SVTHANALTVMGK, TYNYNVLMVPK, VLLPLIFR, VYVELQELVMDEK	911, 929	101791.3,103876.7,	0.241327	4.90983	15	5452,5887,6820,6873,16020,16021,30863,	3	14	77	18	7	5	5	4	9	14	50	11	116	21	95	14
Serum amyloid P-component precursor,	APCS,	IPI00022391,	ENSP00000255040,	NP_001630,	P02743,	AYSLFSYNTQGR, VGEYSLYIGR	223	25386.92,	0.0986547	6.51881	2	5509,5529,5576,5615,6457,6953,51082,51131,															2
39S ribosomal protein L13, mitochondrial,	MRPL13,	IPI00022403,	ENSP00000306548,	NP_054797,	Q9BYD1,	LAIYGMLPK, LHLFPDEYIPEDILK, NLVEELPQPR, RLDEYTQEEIDAFPR, VYSSHTGYPGGFR	178	20691.795,	0.348315	9.52521	5	3735,5622,5739,5762,5840,6412,	3	9	4		3				10	3		5	3
Acyl carrier protein, mitochondrial precursor,	NDUFAB1,	IPI00022442,	ENSP00000007516,	NP_004994,	O14561,	LMCPQEIVDYIADK, LSVNSHFMK, LYDKIDPEK, LYDKIDPEKLSVNSHFMK	156	17417.095,	0.205128	4.53009	4	36,5739,5747,6120,6633,8137,16491,31177,48037,	34	45	74	52	71	16	70	101	47	40	11	64	67	37	77	102
Serotransferrin precursor,Transferrin variant (Fragment),	TF,	IPI00022463,IPI00798430,	ENSP00000264998,	NP_001054,	P02787,	EDPQTFYYAVAVVK, HSTIFENLANK, MYLGYEYVTAIR	698, 698	77049.175,77079.155,	0.0530086	7.08038	3	5576,5768,6826,6879,8199,30139,													3
Trifunctional enzyme beta subunit, mitochondrial precursor,	HADHB,	IPI00022793,	ENSP00000325136,ENSP00000325484,	NP_000174,	P55084,	AALTGLLHR, AGLTMNDIDAFEFHEAFSGQILANFK, ALAMGYKPK, AMDSDWFAENYMGR, AQDEGLLSDVVPFK, AQDEGLLSDVVPFKVPGK, AQDEGLLSDVVPFKVPGKDTVTK, DFMYVSQDPK, DFMYVSQDPKDQLLLGPTYATPK, DLMPHDLAR, DNGIRPSSLEQMAK, DQLLLGPTYATPK, EAALGAGFSDK, EVVDYIIFGTVIQEVK, FNFLAPELPAVSEFSTSETMGHSADR, KAQDEGLLSDVVPFK, KAQDEGLLSDVVPFKVPGK, KLMLDLNK, LAAAFAVSR, LEQDEYALR, LKPAFIKPYGTVTAANSSFLTDGASAMLIMAEEK, LMLDLNK, NVVVVDGVR, TPFLLSGT…	475	51395.06,	0.566316	9.94059	25	3857,3988,4300,5739,5740,6629,6631,6635,8415,16740,	160	268	273	279	203	167	250	266	226	170	229	228	269	273	359	295
Brain protein 44,	BRP44,	IPI00022832,IPI00640179,	ENSP00000271373,ENSP00000356820,	NP_056230,	O95563,	LLDKVELMLPEK, LRPLYNHPAGPR, LSTAQSAVLMATGFIWSR, YSLVIIPK	127, 105	14278.74,11680.75,	0.434946	10.9082	4	5739,	28	18	10	16	12	13	12	7	13	21		13	12	9	12	9
ADP/ATP translocase 1,	SLC25A4,	IPI00022891,	ENSP00000281456,	NP_001142,	P12235,	AAYFGVYDTAK, AFFKGAWSNVLR, DFLAGGVAAAVSK, DFLAGGVAAAVSKTAVAPIER, EFHGLGDCIIK, EQGFLSFWR, GADIMYTGTVDCWR, GLYQGFNVSVQGIIIYR, IPKEQGFLSFWR, KGADIMYTGTVDCWR, LLLQVQHASKQISAEK, QLFLGGVDR, VKLLLQVQHASK, YFAGNLASGGAAGATSLCFVYPLDFAR, YKQLFLGGVDR	298	33064.265,	0.520134	10.2695	15	2,5215,5488,5739,5743,5887,6091,6810,6839,15207,16020,	332	330	323	319	324	152	215	167	367	292	174	272	216	223	302	151
Prolactin-inducible protein precursor,	PIP,	IPI00022974,	ENSP00000291009,	NP_002643,	P12273,	FYTIEILKVE, TVQIAAVVDVIR, TYLISSIPLQGAFNYK	146	16572.275,	0.260274	8.18358	3	3779,5515,5576,8150,						7	3				6
E2-induced gene 5 protein,	C3orf28,	IPI00023001,	ENSP00000232125,	NP_055182,	Q96A26,	EDEIPETVSLEMLDAAK, FKKEDEIPETVSLEMLDAAK, HETLTSLNLEK, KEDEIPETVSLEMLDAAK, VPLHKPTDWQK	154	17342.165,	0.272727	10.4827	5	16020,16021,	35	35	22	33	27	15	27	13	27	38	8	32	22	31	20	12
309 kDa protein,von Willebrand factor precursor,	VWF,	IPI00023014,IPI00788786,	ENSP00000261405,	NP_000543,	P04275,	EGGPSQIGDALGFAVR, LPGDIQVVPIGVGPNANVQELER	2813, 2811	309295.93,309190.74,	0.0138691	5.18084	2	5178,5518,5576,5578,5783,9611,15948,19865,30168,31091,31589,42803,47485,50524,51087,51260,									2
UPF0240 protein C6orf66,	C6orf66,	IPI00023064,	ENSP00000358272,	NP_054884,	Q9P032,	DVYVDSKDPVSSLQVK, EQISLYPEVK, IMQEYQLEQK, ISIVEALTLLNNHK	175	20266.29,	0.285714	9.34537	4	0,	10	8	2		6		8	5	10	16		14	5		6	3
39S ribosomal protein L15, mitochondrial precursor,	MRPL15,	IPI00023086,	ENSP00000260102,	NP_054894,	Q9P015,	DYGVQLVEEGADTFTAK, GYLADPAKFPEAR, ILKPTDENLLK, KYGYILPDITKDELFK, LGFEGGQTPFYIR, LQYLIDLGR, VDPSQPIDLTQLVNGR, VSLANLKPNPGSK	296	33419.475,	0.364865	10.5604	8	3735,5622,5739,5840,6412,15934,		3	4	3	2		3	2	2			4	2		7	2
Isoform 1 of 39S ribosomal protein L22, mitochondrial precursor,Uncharacterized protein MRPL22,	MRPL22,	IPI00023094,IPI00414410,	ENSP00000265229,ENSP00000343328,	NP_054899,	Q9NWU5-1,	EVLLEAQDMAVR, GMSIDQALAQLEFNDK, GMSIDQALAQLEFNDKK, IVYPPQLPGEPR, LVEGPPPPPEPPK, SNLYIAESTSGR	206, 227	23640.455,26063.15,	0.305569	10.2631	6	3735,5622,5840,6412,15934,	8	7	8		7	4	3	4	8	10		6	6		7	6
Isoform 1 of Mitochondrial 39S ribosomal protein L4,	MRPL4,	IPI00023334,	ENSP00000253099,	NP_057040,NP_666499,	Q9BYD3-1,	ATENPEQVASEGLPEPVLR, GPTSYYYMLPMK, HQTLVLTLPTVAFLEDK, VGLADLHPDVFATAPR, WGDSVLLVDLTHEEMPQSIVEATSR	311	34918.95,	0.286174	10.1754	5	3735,5622,5739,5840,6412,	3	6		4			4		3	3		8	3			3
Isoform 1 of Malonyl CoA-acyl carrier protein transacylase, mitochondrial precursor,	MCAT,	IPI00023359,	ENSP00000290429,	NP_775738,	Q8IVS2-1,	LLAQQLVSPVK, LMEPAVEPLTQALK	390	42961.195,	0.0641026	8.88122	2	4314,5739,6633,8152,16740,					2
Transcriptional activator protein Pur-alpha,	PURA,	IPI00023591,	ENSP00000332706,	NP_005850,	Q00577,	GPGLGSTQGQTIALPAQGLIEFR, LIDDYGVEEEPAELPEGTSLTVDNKR	322	34910.625,	0.152174	6.38658	2	784,3691,3697,3705,5634,5662,5737,6268,6270,6350,7399,8134,8284,45892,46332,						4		2
30 kDa protein,36 kDa protein,Isoform 2 of Voltage-dependent anion-selective channel protein 2,Isoform 3 of Voltage-dependent anion-selective channel protein 2,Voltage-dependent anion-selective channel protein 2,similar to voltage-dependent anion channel 2,	LOC647153,LOC729317,VDAC2,	IPI00024145,IPI00216024,IPI00216026,IPI00455531,IPI00737171,IPI00855744,IPI00855973,	ENSP00000298468,ENSP00000344876,ENSP00000361635,ENSP00000361686,ENSP00000367226,	NP_003366,XP_001133585,XP_946879,	P45880-1,P45880-2,P45880-3,	GFGFGLVK, LTFDTTFSPNTGK, LTFDTTFSPNTGKK, LTLSALVDGK, NNFAVGYR, TGDFQLHTNVNDGTEFGGSIYQK, VNNSSLIGVGYTQTLR, VNNSSLIGVGYTQTLRPGVK, VTGTLETK, YQLDPTASISAK	347, 283, 294, 293, 293, 282, 331	38092.44,30411.94,31566.265,31479.19,31445.17,30347.855,36231.3,	0.341518	7.35905	10	5739,5741,6820,8308,15288,15482,16020,16021,19867,	131	189	126	78	186	123	160	171	146	135	99	188	169	85	113	163
Microsomal glutathione S-transferase 3,	MGST3,	IPI00024266,IPI00639812,	ENSP00000356858,ENSP00000356859,ENSP00000356860,ENSP00000356861,ENSP00000356864,	NP_004519,	O14880,	IASGLGLAWIVGR, VLYAYGYYTGEPSK, VLYAYGYYTGEPSKR	152, 166	16516.185,18416.515,	0.176443	10.0277	3	4601,5624,5783,5792,6629,7165,16020,16021,16740,	69	78	25	23	61	41	45	38	66	73	26	56	49		22	36
Isoform Long of Glutaryl-CoA dehydrogenase, mitochondrial precursor,	GCDH,	IPI00024317,	ENSP00000222214,	NP_000150,	Q92947-1,	AITGIQAFTASK, EIISEMGELGVLGPTIK, HAMNLEAVNTYEGTHDIHALILGR	438	48126.715,	0.121005	8.15004	3	4361,5739,5743,6118,8152,50660,		3			2			2
Dihydroorotate dehydrogenase, mitochondrial precursor,	DHODH,	IPI00024462,	ENSP00000219240,	NP_001352,	Q02127,	IAPDLTSQDKEDIASVVK, LTEDGLPLGVNLGK, TSVDAAEDYAEGVR	397	43039.15,	0.115869	10.215	3	4152,4158,5739,5743,6207,6221,6222,8152,16020,16491,									2						3
Methylcrotonoyl-CoA carboxylase subunit alpha, mitochondrial precursor,Putative uncharacterized protein DKFZp686B20267,	MCCC1,	IPI00024580,IPI00792499,	ENSP00000265594,	NP_064551,	Q96RQ3,	EGSIEIDIPVPK, IPLSQEEITLQGHAFEAR, SEQEFQEQLESAR	725, 616	80472.45,68331.495,	0.0645578	7.32638	3	5524,5739,5743,5759,6552,6768,8152,9374,16874,			2					2
Short/branched chain specific acyl-CoA dehydrogenase, mitochondrial precursor,	ACADSB,	IPI00024623,	ENSP00000357873,	NP_001600,	P45954,	ATYLPQLTTEK, DTPGLHIGKPENK, FAQEQIAPLVSTMDENSK, GITSFLVDR, GITSFLVDRDTPGLHIGKPENK, IGTIYEGASNIQLNTIAK, LFDFQGLQHQVAHVATQLEAAR, LLEAGKPFIK, VPEANILGQIGHGYK, YAIGSLNEGR, YYASEIAGQTTSK	432	47485.035,	0.321759	6.99706	11	3995,5739,6118,6629,6631,50660,	16	16	19	11	26	9	17	14	21	2	3	6	15	9	22	20
Ubiquinol-cytochrome c reductase complex ubiquinone-binding protein QP-C,	UQCRQ,	IPI00024742,	ENSP00000296876,ENSP00000367934,ENSP00000367936,ENSP00000367939,	NP_055217,	O14949,	AYPHVFTK, GREFGNLTR, HVISYSLSPFEQR, IRESFFR, MRHVISYSLSPFEQR	82	9906.315,	0.47561	10.5004	5	5739,5750,6118,6810,8121,16020,16491,	33	37	132	44	90		51	56	35	28		83	52	28	75	58
Isoform SERCA1A of Sarcoplasmic/endoplasmic reticulum calcium ATPase 1,Isoform SERCA1B of Sarcoplasmic/endoplasmic reticulum calcium ATPase 1,	ATP2A1,	IPI00024804,IPI00396118,	ENSP00000349595,	NP_004311,NP_775293,	O14983-1,O14983-2,	AEIGIAMGSGTAVAK, ALDLTQWLMVLK, ALGIVATTGVGTEIGK, ARDIVPGDIVEVAVGDK, ARDIVPGDIVEVAVGDKVPADIR, DIVPGDIVEVAVGDK, DIVPGDIVEVAVGDKVPADIR, DQMAATEQDKTPLQQK, DTPPKREEMVLDDSAR, EEMVLDDSAR, EFDDLPLAEQR, EFTLEFSR, EPLISGWLFFR, GAPEGVIDR, HTEPVPDPR, IGIFGENEEVADR, IRDQMAATEQDKTPLQQK, ISLPVIGLDEILK, IVEYLQSYDEITAMTGDGVNDAPALK, IVEYLQSYDEITAMTGDGVNDAPALKK, KAEIGIAMGSGTAVAK, KEFTLEFSR, KNMLFSGTNIAAGK, LDEFGEQL…	1001, 994	110251.36,109282.355,	0.349879	4.8046	37	166,287,5388,5509,5515,5524,6812,6816,6942,8152,15992,16020,16021,16529,16787,16820,31448,	522	749	809	597	521	307	588	354	562	896	482	1189	1076	529	786	815
Endoplasmic reticulum protein ERp29 precursor,	ERP29,	IPI00024911,	ENSP00000261735,	NP_006808,	P30040,	DGDFENPVPYTGAVK, GALPLDTVTFYK, SLNILTAFQK	261	28993.18,	0.141763	7.48578	3	3756,5783,5788,6457,6886,9306,		2	6		2		3		3	2		2	3	2	5	2
Isoform Long of ES1 protein homolog, mitochondrial precursor,	C21orf33,	IPI00024913,	ENSP00000374339,ENSP00000374340,	NP_004640,	P30042-1,	EVVEAHVDQK, GGAEVQIFAPDVPQMHVIDHTK, GKITDLANLSAANHDAAIFPGGFGAAK, GVEVTVGHEQEEGGK, GVEVTVGHEQEEGGKWPYAGTAEAIK, ITDLANLSAANHDAAIFPGGFGAAK, KVLELTGK, NLSTFAVDGK	268	28170.225,	0.384328	8.39571	8	5618,5739,	74	90	82	96	97	39	78	75	77	78	24	72	60	29	59	67
Isoform Cytoplasmic+peroxisomal of Peroxiredoxin-5, mitochondrial precursor,Isoform Mitochondrial of Peroxiredoxin-5, mitochondrial precursor,	PRDX5,	IPI00024915,IPI00759663,	ENSP00000265462,	NP_036226,	P30044-1,P30044-2,	ETDLLLDDSLVSIFGNR, ETDLLLDDSLVSIFGNRR, FSMVVQDGIVK, LLADPTGAFGK, THLPGFVEQAEALK, VGDAIPAVEVFEGEPGNK, VGDAIPAVEVFEGEPGNKVNLAELFK, VNLAELFK	214, 162	22026.205,17030.625,	0.433829	8.0592	8	5737,5739,5777,6954,6979,16491,51920,	100	96	64	64	99	42	56	58	85	82	39	86	52	57	69	54
Thioredoxin-dependent peroxide reductase, mitochondrial precursor,peroxiredoxin 3 isoform b,	PRDX3,	IPI00024919,IPI00374151,	ENSP00000298510,ENSP00000349432,	NP_006784,NP_054817,	P30048,	AFQYVETHGEVCPANWTPDSPTIKPSPAASK, DLSLDDFK, DYGVLLEGSGLALR, GLFIIDPNGVIK, GTAVVNGEFK, GTAVVNGEFKDLSLDDFK, HLSVNDLPVGR, KNGGLGHMNIALLSDLTK, NGGLGHMNIALLSDLTK, SVEETLR	256, 238	27692.375,25838.325,	0.44999	7.70744	10	5739,8385,16209,16491,19901,51092,51920,	135	153	140	128	142	84	118	99	122	132	77	149	90	123	139	95
ATP synthase delta chain, mitochondrial precursor,	ATP5D,	IPI00024920,	ENSP00000215375,	NP_001001975,NP_001678,	P30049,	AQAELVGTADEATR, IEANEALVK, PGLVVVHAEDGTTSK, QVDVPTLTGAFGILAAHVPTLQVLR	168	17489.755,	0.375	5.19152	4	5215,5624,5739,5753,6811,15986,15992,16469,16787,45261,46872,46933,46961,	96	82	48	49	69	27	50	31	79	88	26	52	54	65	46	44
60S ribosomal protein L12,Ribosomal protein L12 variant,	RPL12,	IPI00024933,IPI00479158,	ENSP00000352744,ENSP00000354739,	NP_000967,	P30050,	HSGNITFDEIVNIAR, IGPLGLSPK, QAQIEVVPSASALIIK	165, 229	17818.42,24723.38,	0.208548	10.3494	3	3735,5622,5840,5842,6412,	3	14					5	2	8	4		7	3
Mitochondrial import receptor subunit TOM22 homolog,	TOMM22,	IPI00024976,	ENSP00000216034,	NP_064628,	Q9NS69,	GDAEKPEEELEEDDDEELDETLSER, LQMEQQQQLQQR, LWGLTEMFPER, QILLGPNTGLSGGMPGALPSLPGK, QILLGPNTGLSGGMPGALPSLPGKI	142	15521.475,	0.514085	3.98992	5	4872,5515,5739,5742,6626,15031,16020,16021,19867,43681,	5		2	3	6		3	2	4	5		8	5		2
Isoform RTN2-A of Reticulon-2,Isoform RTN2-C of Reticulon-2,	RTN2,	IPI00024983,IPI00410134,	ENSP00000245923,	NP_005610,NP_996784,	O75298-1,O75298-3,	GDGANPFQAYLDVDLTLTR, QHQAQIDQYVGLVTNQLSHIK, VADLLYWK, VVSAATQLR	545, 205	59263.19,22316.05,	0.191318	7.4956	4	4871,5783,7165,16020,16021,30176,	27	85	29	50	20	26	18	2	80	35	21	54	24	41	45	22
Methylmalonate-semialdehyde dehydrogenase [acylating], mitochondrial precursor,	ALDH6A1,	IPI00024990,	ENSP00000342564,	NP_005580,	Q02252,	AFPAWADTSVLSR, AGEYIFER, ENTLNQLVGAAFGAAGQR, KWLPELVEHAK, KYAHLVDVGQVGVNVPIPVPLPMFSFTGSR, NHGVVMPDANKENTLNQLVGAAFGAAGQR, QGIQFYTQLK, SDKWIDIHNPATNEVIGR, TLADAEGDVFR, VNAGDQPGADLGPLITPQAK, VPGATMLLAK, WIDIHNPATNEVIGR	535	57839.31,	0.299065	8.6853	12	62,4491,5739,6220,6573,8152,16491,18478,19859,		7	11	6	14	10	7	9		4		4	6		4	4
Enoyl-CoA hydratase, mitochondrial precursor,	ECHS1,	IPI00024993,	ENSP00000357535,	NP_004083,	P30084,	AFAAGADIK, ALNALCDGLIDELNQALK, AQFAQPEILIGTIPGAGGTQR, EGMTAFVEK, EGMTAFVEKR, ESVNAAFEMTLTEGSK, ESVNAAFEMTLTEGSKLEK, GKNNTVGLIQLNRPK, HWDHLTQVK, KEGMTAFVEK, KLFYSTFATDDR, KLFYSTFATDDRK, LFYSTFATDDR, LFYSTFATDDRK, NNTVGLIQLNRPK, SLAMEMVLTGDR, TFEEDPAVGAIVLTGGDK	290	31387.085,	0.496552	8.19244	17	4300,5515,5739,6091,6629,6631,6635,16829,	102	110	105	54	114	56	69	103	101	90	26	89	67	53	84	80
Cytochrome c oxidase subunit 5A, mitochondrial precursor,	COX5A,	IPI00025086,	ENSP00000317780,	NP_004246,	P20674,	EIYPYVIQELR, GINTLVTYDMVPEPK, ILEVVKDK, KGINTLVTYDMVPEPK, PDIDAWELRK, PTLNELGISTPEELGLDKV, WVTYFNKPDIDAWELR, WVTYFNKPDIDAWELRK	150	16774.035,	0.466667	6.7774	8	4129,5506,5739,5743,6118,9055,16020,46872,	42	99	50	85	144	46	59	51	94	42	28	90	47	44	46	43
127 kDa protein,130 kDa protein,Myosin-binding protein C, slow-type,myosin binding protein C, slow type isoform 1,myosin binding protein C, slow type isoform 2,myosin binding protein C, slow type isoform 4,	MYBPC1,	IPI00025092,IPI00384170,IPI00410261,IPI00791598,IPI00791650,IPI00797657,	ENSP00000353822,ENSP00000354845,ENSP00000354849,	NP_002456,NP_996555,NP_996556,NP_996557,	Q00872,	ADAAEYSVMTTGGQSSAK, AVNAAGASEPK, AVNDLGTVEIECK, DDGNAAITGYTIQK, DDSGVYHINLK, DGAEIDKNQINIR, EPPIMVTK, FTITGLPTDAK, FVETASIDIQIIDRPGPPQIVK, FVVELADPK, FVVELADPKLEVK, HILIIEGATK, IAFQYGITDLR, IEDVWGENVALTWTPPK, IEDVWGENVALTWTPPKDDGNAAITGYTIQK, IFAVNAIGISK, IFAVNAIGISKPSMPSR, IILDGLDADNTVTVIAGNK, ILDPAYQVDK, ILTPLTDQTVNLGK, IRTESYPDSSTLVIDIAER, IRTESYPDSSTLVIDIAERDDSGVYHINLK, KDGAEIDKNQINIR, KHILIIE…	1141, 1148, 1171, 1151, 1126, 1123	128293.34,129077.295,131692.17,129507.71,126888.915,126458.5,	0.401537	5.94451	47	5515,5737,5863,6941,7155,8307,	228	378	258	255	338	185	351	457	339	252	440	305	237	421	203	377
2-oxoisovalerate dehydrogenase subunit alpha, mitochondrial precursor,CDNA FLJ45695 fis, clone FEBRA2013570, highly similar to 2- oxoisovalerate dehydrogenase alpha subunit, mitochondrial,	BCKDHA,	IPI00025100,IPI00444329,	ENSP00000269980,ENSP00000351007,	NP_000700,	P12694,	HFVTISSPLATQIPQAVGAAYAAK, QGQIINPSEDPHLPK, VDGNDVFAVYNATK	445, 479	50470.58,54130.44,	0.114874	7.46137	3	3863,5515,5739,5947,8152,9083,16831,30955,46872,			3		2
NADH dehydrogenase [ubiquinone] iron-sulfur protein 2, mitochondrial precursor,	NDUFS2,	IPI00025239,	ENSP00000356972,	NP_004541,	O75306,	APGFAHLAGLDK, ETAHWKPPPWNDVDPPKDTIVK, GEFGVYLVSDGSSR, GEFGVYLVSDGSSRPYR, GHMLADVVAIIGTQDIVFGEVDR, GSGIQWDLR, IKAPGFAHLAGLDK, KTQPYDVYDQVEFDVPVGSR, LDELEELLTNNR, LLNIRPPPR, LVMELSGEMVR, LYTEGYQVPPGATYTAIEAPK, MHAAYIRPGGVHQDLPLGLMDDIYQFSK, MPPGEIKVDDAK, NITLNFGPQHPAAHGVLR, PGGVHQDLPLGLMDDIYQFSK, QWQPDVEWAQQFGGAVMYPSK, TIDIGVVTAEEALNYGFSGVMLR, TQPYDVYDQVEFDVPVGSR, TSMESLIHHFK, TYLQALPYFDR, VLFGEITR	463	52545.26,	0.62635	7.60578	22	3954,5506,5739,5747,6120,6979,8137,16020,46872,51287,51539,	44	57	51	61	62	41	54	56	51	40	27	53	49	31	45	53
Protein disulfide-isomerase A3 precursor,Uncharacterized protein PDIA3,	PDIA3,	IPI00025252,IPI00657680,	ENSP00000300289,ENSP00000370944,ENSP00000370947,	NP_005304,	P30101,	EATNPPVIQEEKPK, FLQDYFDGNLK, FLQDYFDGNLKR, LAPEYEAAATR, LSKDPNIVIAK, TFSHELSDFGLESTAGEIPVVAIR	505, 485	56781.84,54962.96,	0.145514	6.56492	6	5515,5783,6606,6621,7165,16853,43065,45454,			5	3			3						2		2
D-beta-hydroxybutyrate dehydrogenase, mitochondrial precursor,	BDH1,	IPI00025341,	ENSP00000350914,	NP_004042,NP_976059,NP_976060,	Q02338,	MQIMTHLPGAISDMIYIR, MWEELPEVVR, QVAEVNLWGTVR, SFLPLIR, VSVVEPGNFIAATSLYSPESIQAIAK, VVNISSMLGR	343	38156.77,	0.241982	9.23658	6	3858,5739,5743,5759,8152,16491,	12	13	7	9	26	20	26	11	13	9		6	21
NADH dehydrogenase [ubiquinone] iron-sulfur protein 6, mitochondrial precursor,	NDUFS6,	IPI00025344,	ENSP00000274137,ENSP00000372081,	NP_004544,	O75380,	EVNENFAIDLIAEQPVSEVETR, QKEVNENFAIDLIAEQPVSEVETR, VTHTGQVYDDKDYR, VTHTGQVYDDKDYRR, VYINLDKETK	124	13711.535,	0.395161	8.38075	5	3954,5739,5747,6120,8137,16020,	9	25	13	27	41	15	21	17	31	6	8	25	19	6	7	17
Citrate synthase, mitochondrial precursor,	CS,	IPI00025366,	ENSP00000342056,	NP_004068,	O75390,	ALGFPLERPK, ALGVLAQLIWSR, DILADLIPK, DYIWNTLNSGR, EGSGIGAIDSNLDWSHNFTNMLGYTDHQFTELTR, EVGKDVSDEKLR, GLVYETSVLDPDEGIR, HLPNDPMFK, IVPNVLLEQGK, LRDYIWNTLNSGR, LVAQLYK, SMSTEGLMK, TKYWELIYEDSMDLIAK, TVVGQITVDMMYGGMR, VVPGYGHAVLR, YWELIYEDSMDLIAK	466	51712.025,	0.39485	8.52965	16	4108,5737,5739,5759,5975,6099,16740,	98	134	102	73	132	50	83	92	126	59	70	106	105	51	125	113
Mimecan precursor,Osteoglycin,osteoglycin preproprotein isoform 1,	OGN,	IPI00025465,IPI00515092,IPI00830128,	ENSP00000262551,ENSP00000364703,ENSP00000364704,ENSP00000364711,	NP_054776,NP_077727,NP_148935,	P20774,	DFADIPNLR, RLDFTGNLIEDIEDGTFSK	298, 268, 316	33921.765,30456.045,36095.225,	0.0956816	6.87841	2	5515,5575,5578,5783,8083,8150,	3											2
Heat shock protein beta-1,	HSPB1,	IPI00025512,	ENSP00000248553,	NP_001531,	P04792,	KYTLPPGVDPTQVSSSLSPEGTLTVEAPMPK, LATQSNEITIPVTFESR, LFDQAFGLPR, VSLDVNHFAPDELTVK	205	22782.3,	0.360976	6.36292	4	5515,5737,5856,6446,6916,6928,6986,9986,			3	2			6			2			8		8	4
Metaxin-2,metaxin 2 isoform b,	MTX2,	IPI00025717,IPI00477773,	ENSP00000249442,	NP_001006636,NP_006545,	O75431,	GHSLSDGLEEVQK, GHSLSDGLEEVQKAEMK, LGTQPYFFNK, RIEQHYFEDR, VPFIHVGNQVVSELGPIVQFVK, YGSPYPWPLNHILAYQK	263, 253	29763,28822.95,	0.294684	6.37635	6	5739,5741,6839,15031,16020,19867,	19	15	14	5	15	6	20	11	16	24	3	19	15	2	16	15
Desmoglein-1 precursor,	DSG1,	IPI00025753,	ENSP00000257192,	NP_001933,	Q02413,	VGDFVATDLDTGRPSTTVR, YQGTILSIDDNLQR, YVMGNNPADLLAVDSR	1049	113714.64,	0.0467111	4.6553	3	5509,5515,5737,5856,7043,7156,15643,16020,16021,16339,30057,				2				2					2
NADH dehydrogenase [ubiquinone] iron-sulfur protein 3, mitochondrial precursor,	NDUFS3,	IPI00025796,	ENSP00000263774,	NP_004542,	O75489,	AANWYER, DFPLSGYVELR, EIWDMFGVFFANHPDLR, ESAGADTRPTVRPR, FDLNSPWEAFPVYR, FEIVYNLLSLR, ILTDYGFEGHPFR, KDFPLSGYVELR, KFDLNSPWEAFPVYR, QLSAFGEYVAEILPK, QNRFEIVYNLLSLR, RVVAEPVELAQEFR, SLVDLTAVDVPTR, TYTDELTPIESAVSVFK, VKTYTDELTPIESAVSVFK, VVAEPVELAQEFR, VVAEPVELAQEFRK	264	30241.245,	0.579546	7.61726	17	3954,5739,5747,6120,6800,6917,8137,16020,30308,31966,	119	138	117	146	182	90	121	113	135	122	72	134	114	80	111	123
Dolichyl-diphosphooligosaccharide--protein glycosyltransferase 67 kDa subunit precursor,	RPN1,	IPI00025874,	ENSP00000296255,	NP_002941,	P04843,	ATSFLLALEPELEAR, NIEIDSPYEISR, SEDLLDYGPFR	646	72777.625,	0.0588235	6.2193	3	3723,4579,5783,6486,8250,16020,16021,16740,18279,30867,		2	4				3					4	2			2
Myosin-1,	MYH1,	IPI00025879,	ENSP00000226207,	NP_005954,	P12882,	AAYLQNLNSADLLK, ALEDQLSEIK, ANSEVAQWR, DTLVSQLSR, DTQLHLDDALR, EFEMSGLQSK, EKSEMKMEIDDLASNMETVSK, GQTVQQVYNAVGALAK, IAEKDEEIDQMK, IAEKDEEIDQMKR, IEDEQALGMQLQK, IQHELEEAEER, IQHELEEAEERADIAESQVNK, IQHELEEAEERADIAESQVNKLR, KEFEMSGLQSK, KKEFEMSGLQSK, KKLETDISQIQGEMEDIIQEAR, KLETDISQIQGEMEDIIQEAR, KQVEQEKSELQAALEEAEASLEHEEGK, LETDISQIQGEMEDIIQEAR, LQDAEEHVEAVNAK, LQNEVEDLMIDVER, LQTESGEYSR, LTGAVMHYG…	1939	223113.71,	0.195977	5.47232	41	146,166,3779,5516,5524,5863,6941,16459,	211	760	439	303	288	96	303	206	526	560	251	1023	355	1027	738	579
Myosin-7,	MYH7,	IPI00025880,	ENSP00000347507,	NP_000248,	P12883,	Big String	1935	223095.5,	0.551938	5.53569	136	146,166,2027,3779,5516,5524,5863,6941,7512,8307,16459,16887,30049,30898,55010,	4201	5159	4796	4175	4641	3580	6203	7879	5568	4161	3617	2854	3969	5222	3231	6049
Barrier-to-autointegration factor,Uncharacterized protein ENSP00000316411,	BANF1,LOC645870,	IPI00026087,IPI00186338,	ENSP00000310275,ENSP00000316411,	NP_003851,XP_935572,XP_946635,	O75531,	AYVVLGQFLVLK, DFVAEPMGEKPVGSLAGIGEVLGK, HRDFVAEPMGEKPVGSLAGIGEVLGK, PVGSLAGIGEVLGK	89, 86	10058.5,9740.105,	0.434413	5.88521	4	3677,5694,5737,9615,	8	4				5	16	12	6	4		4	16			22
40S ribosomal protein S14,	RPS14,	IPI00026271,	ENSP00000311028,	NP_001020241,NP_001020242,NP_005608,	P62263,	IEDVTPIPSDSTR, TPGPGAQSALR	151	16272.58,	0.15894	10.7867	2	28,3723,3735,5515,5622,5840,5843,6412,30490,45892,														9
Succinyl-CoA:3-ketoacid-coenzyme A transferase 1, mitochondrial precursor,	OXCT1,	IPI00026516,	ENSP00000196371,ENSP00000371064,	NP_000427,	P55809,	GLTAVSNNAGVDNFGLGLLLR, GMGGAMDLVSSAK	520	56157.175,	0.0653846	7.52129	2	5739,6104,8152,8260,16740,		4	4			5							4
Peptidyl-prolyl cis-trans isomerase, mitochondrial precursor,	PPIF,	IPI00026519,	ENSP00000225174,	NP_005720,	P30405,	FPDENFTLK, GSGDPSSSSSSGNPLVYLDVDANGKPLGR, HVVFGHVK, KIESFGSK, TDWLDGK	207	22040.09,	0.294686	9.94971	5	3755,5624,5739,6457,16853,42277,	20	23	21	19	22	11	16	18	21	16	9	12	19			18
41 kDa protein,HLA class I histocompatibility antigen, A-1 alpha chain precursor,HLA class I histocompatibility antigen, A-2 alpha chain precursor,HLA class I histocompatibility antigen, A-23 alpha chain precursor,HLA class I histocompatibility antigen, A-24 alpha chain precursor,HLA class I histocompatibility antigen, A-25 alpha chain precursor,HLA class I histocompatibility antigen, A-26 alpha …	HLAA,HLAA29.1,HLAB,HLAC,LOC730410,MICA,	IPI00026569,IPI00472013,IPI00472035,IPI00472112,IPI00472151,IPI00472222,IPI00472448,IPI00472825,IPI00472855,IPI00472882,IPI00472921,IPI00473006,IPI00640502,IPI00644631,IPI00644748,IPI00646225,IPI00647457,IPI00647634,IPI00742968,IPI00743359,IPI00743503,IPI00743716,IPI00744654,IPI00745220,IPI00745649,IPI00760554,IPI00785070,IPI00794678,IPI00816119,IPI00816779,IPI00829792,IPI00847195,IPI00847323,	ENSP00000365998,ENSP00000365999,ENSP00000366001,ENSP00000366002,ENSP00000366005,ENSP00000372989,ENSP00000372990,ENSP00000373010,ENSP00000373112,	NP_001074309,NP_002107,	P01891,P01892,P04439,P05534,P10314,P10316,P13746-1,P13746-2,P16188,P16189,P16190,P18462,P30443,P30447,P30450,P30453,P30455,P30456,P30457,P30459,P30508,P30512,Q29960-1,Q29960-2,Q95604,	DGEDQTQDTELVETRPAGDGTFQK, FIAVGYVDDTQFVR	365, 365, 326, 371, 365, 365, 365, 365, 365, 365, 365, 372, 326, 365, 365, 365, 371, 365, 365, 365, 365, 366, 365, 365, 366, 365, 371, 319, 299, 345, 371, 371, 326	40845.51,40891.5,36797.535,41464.1,40732.31,40890.52,40936.51,41047.72,40904.46,40908.51,40862.5,41237.895,36883.665,40921.59,40933.62,41003.62,41368,40840.41,40688.26,41061.51,41054.55,40885.425,41081.54,41217.72,40752.325,40976.57,41621.16,36302.09,34215.98,38702.89,41325.92,41331.02,36846.685,	0.106244	6.31323	2	6955,16020,16021,19882,42612,													3
Cytochrome c oxidase polypeptide VIIa-liver/heart, mitochondrial precursor,	COX7A2,	IPI00026570,	ENSP00000230459,ENSP00000359098,ENSP00000359106,	NP_001856,	P14406,	GGVADALLYR, LFQEDDEIPLYLK	115	12843.87,	0.2	9.53506	2	4129,5739,5746,6118,9055,16020,	3	12	18	17	28	10	18	27	8	4	5	24	17	19	14	19
37 kDa protein,78 kDa protein,Isoform 1 of Sarcolemmal membrane-associated protein,Isoform 2 of Sarcolemmal membrane-associated protein,Isoform 3 of Sarcolemmal membrane-associated protein,Isoform 4 of Sarcolemmal membrane-associated protein,Isoform 5 of Sarcolemmal membrane-associated protein,Isoform 8 of Sarcolemmal membrane-associated protein,Protein,	SLMAP,	IPI00026691,IPI00030531,IPI00385800,IPI00791574,IPI00793853,IPI00794462,IPI00794566,IPI00794849,IPI00795406,IPI00847344,	ENSP00000295951,ENSP00000295952,ENSP00000373223,	NP_009090,	Q14BN4-1,Q14BN4-2,Q14BN4-3,Q14BN4-4,Q14BN4-5,Q14BN4-8,	ENVLLSSELQR, QSLELTSDLSILQMSR	452, 811, 318, 828, 433, 359, 790, 409, 271, 679	52227.345,93202.17,37130.655,95197.475,50262.825,41895.95,90828.455,47301.765,31437.09,78412.5,	0.0587693	4.95122	2	5790,5887,6457,16020,16272,51082,												3
Isoform 1 of Erlin-2 precursor,	ERLIN2,	IPI00026942,	ENSP00000276461,	NP_009106,	O94905-1,	IEVVNFLVPNAVYDIVK, ISEIEDAAFLAR, LALQQDLTSMAPGLVIQAVR, LSFGLEDEPLETATK, LSFGLEDEPLETATKEN, SVQTTLQTDEVK, VAQVAEITYGQK	339	37839.23,	0.265487	5.32522	7	3674,5783,5789,8150,16020,	3	6	9				9			2		2	5		4	6
Ubiquinol-cytochrome c reductase iron-sulfur subunit, mitochondrial precursor,	UQCRFS1,	IPI00026964,	ENSP00000306397,	NP_005994,	P47985,	EIEQEAAVELSQLR, EIEQEAAVELSQLRDPQHDLDR, ESLSGQAVR, GFSYLVTGVTTVGVAYAAK, GKPLFVR, GVAGALRPLVQATVPATPEQPVLDLK, KGFSYLVTGVTTVGVAYAAK, LGPAPLNLEVPTYEFTSDDMVIVG, NAVTQFVSSMSASADVLALAK, PLVQATVPATPEQPVLDLK, RLEVLDSTK, SGPFAPVLSATSR, TQKEIEQEAAVELSQLR, TQKEIEQEAAVELSQLRDPQHDLDR, VPDFSEYR, VPDFSEYRR	274	29667.695,	0.591241	8.46511	16	5506,5739,5750,6118,6810,8121,16020,16021,16491,46872,51537,	317	366	186	148	467	180	357	246	386	273	175	309	348	117	214	284
39S ribosomal protein L19, mitochondrial precursor,	MRPL19,	IPI00027096,	ENSP00000233713,	NP_055578,	P49406,	GLGATFILR, VLHIPEFYVGSILR	292	33534.685,	0.0787671	10.0584	2	3735,5622,5634,5739,5840,6412,31965,												2
Tu translation elongation factor, mitochondrial,	TUFM,	IPI00027107,	ENSP00000322439,	NP_003312,	P49411,	ADAVQDSEMVELVELEIR, AEAGDNLGALVR, DKPHVNVGTIGHVDHGK, DLEKPFLLPVEAVYSVPGR, EHLLLAR, ELLTEFGYK, GITINAAHVEYSTAAR, GLVMVKPGSIKPHQK, GTVVTGTLER, HYAHTDCPGHADYVK, IILPPEKELAMPGEDLK, KYEEIDNAPEER, LLDAVDTYIPVPAR, PGSIKPHQK, PHVNVGTIGHVDHGK, QIGVEHVVVYVNK, TIGTGLVTNTLAMTEEEK, TVVTGIEMFHK, VEAQVYILSK, YEEIDNAPEER	455	49874.55,	0.512088	7.67644	20	166,3746,3924,5515,5525,5622,5739,6414,	70	92	86	79	101	46	71	87	94	59	63	74	94	61	98	80
30 kDa protein,SCO1 protein homolog, mitochondrial precursor,	SCO1,	IPI00027233,IPI00793065,	ENSP00000255390,	NP_004580,	O75880,	HIGKPLLGGPFSLTTHTGER, KGEIAASIATHMRPYR, LVGLTGTREEVDQVAR	301, 270	33813.69,30178.485,	0.182675	9.64788	3	5739,6118,6457,8535,46872,		4	8	5	4	2	5	3	5	5		5	3	2	5	3
Prohibitin-2,	PHB2,	IPI00027252,		NP_009204,	Q99623,	AQFLVEK, AQVSLLIR, DLQMVNISLR, ESVFTVEGGHR, EYTAAVEAK, FNASQLITQR, IGGVQQDTILAEGLHFR, IPWFQYPIIYDIR, IVQAEGEAEAAK, IYLTADNLVLNLQDESFTR, LGLDYEER, LLLGAGAVAYGVR, MLGEALSK, VLPSIVNEVLK, VLSRPNAQELPSMYQR	299	33296.06,	0.575251	10.4065	15	4872,5515,5634,5737,5739,5743,6350,6355,16020,16481,16566,30331,	139	170	142	94	146	105	151	129	167	139	80	146	142	95	132	116
Myosin light polypeptide 6B,	MYL6,MYL6B,	IPI00027255,	ENSP00000207437,	NP_002466,	P14649,	ALGQNPTNAEVLK, DQLEEFKEAFELFDR, EAFELFDR, GQGTYEDYLEGFR, HVLTTLGEK, RVDFETFLPMLQAVAK, VDFETFLPMLQAVAK	208	22763.855,	0.317308	5.43927	7	3774,5509,5515,5859,7519,8307,16461,30049,	42	8	12		5	55	15	16	15	22	4					12
Peroxiredoxin-2,Uncharacterized protein PRDX2,	PRDX2,	IPI00027350,IPI00375400,	ENSP00000301522,ENSP00000334063,	NP_005800,	P32119,	EGGLGPLNIPLLADVTR, KEGGLGPLNIPLLADVTR, QITVNDLPVGR	198, 148	21891.725,16102.115,	0.171205	6.14481	3	5737,6916,6979,16209,16491,42981,	13	13	6	10	7	8	7	8	17	20	15	18	21		10	12
Myeloblastin precursor,	PRTN3,	IPI00027409,	ENSP00000234347,	NP_002768,	P24158,	LVNVVLGAHNVR, VALYVDWIR	256	27806.815,	0.0820312	8.42457	2	4252,5515,5575,6508,8284,30574,											3
Flotillin 1,Flotillin-1,	FLOT1,	IPI00027438,IPI00607626,IPI00789691,IPI00791583,IPI00792079,	ENSP00000365565,ENSP00000365569,ENSP00000372872,ENSP00000372873,ENSP00000373055,ENSP00000373056,	NP_005794,	O75955,	ISLNTLTLNVK, TEAEIAHIALETLEGHQR, VASSDLVNMGISVVSYTLK	427, 305, 192, 252, 185	47354.95,33452.2,21347.485,28165.195,20481.62,	0.193945	8.00687	3	16020,16021,16600,							2		3	3			3
ATP synthase subunit g, mitochondrial,	ATP5L,	IPI00027448,	ENSP00000300688,	NP_006467,	O75964,	IVNSAQTGSFK, KIVNSAQTGSFK, LATFWYYAK, NLVEKTPALVNAAVTYSKPR, TPALVNAAVTYSK, TPALVNAAVTYSKPR, VELVPPTPAEIPR	103	11428.4,	0.524272	10.1329	7	5515,5739,6811,15986,15992,16469,45263,46872,46933,46961,	89	99	235	162	192	70	177	135	126	96	57	166	161	100	206	132
Creatine kinase M-type,	CKM,	IPI00027487,	ENSP00000221476,	NP_001815,	P06732,	AVEKLSVEALNSLTGEFK, ELFDPIISDR, EQQQLIDDHFLFDKPVSPLLLASGMAR, FEEILTR, FKLNYKPEEEYPDLSK, GGDDLDPNYVLSSR, GQSIDDMIPAQK, GTGGVDTAAVGSVFDVSNADR, IEEIFKK, LGSSEVEQVQLVVDGVK, LNYKPEEEYPDLSK, LSVEALNSLTGEFK, LSVEALNSLTGEFKGK, RGTGGVDTAAVGSVFDVSNADR, SFLVWVNEEDHLR, SMTEKEQQQLIDDHFLFDKPVSPLLLASGMAR, TDLNHENLK, TDLNHENLKGGDDLDPNYVLSSR, VLTLELYK, VLTLELYKK	381	43100.91,	0.493438	7.28169	20	166,4111,5524,5737,46314,	86	123	116	58	72	108	119	115	117	132	58	63	59	78	76	129
Dermcidin precursor,	DCD,	IPI00027547,	ENSP00000293371,	NP_444513,	P81605,	DAVEDLESVGK, GAVHDVKDVLDSVL, LGKDAVEDLESVGK	110	11283.745,	0.254545	6.5155	3	5515,5576,6805,30145,42742,50832,						3	3	6				2	7			3
Short-chain specific acyl-CoA dehydrogenase, mitochondrial precursor,	ACADS,	IPI00027701,	ENSP00000242592,	NP_000008,	P16219,	AEGDSWVLNGTK, DSILGEPGMGFK, ELFPIAAQVDK, ELFPIAAQVDKEHLFPAAQVK, GISAFLVPMPTPGLTLGK, IAMQTLDMGR, ITEIYEGTSEIQR, LAASEAATAISHQAIQILGGMGYVTEMPAER, LADMALALESAR, LQVIQFK, LVIAGHLLR, MAFGAPLTK, QAWVTPFTSGDK	412	44296.705,	0.402913	8.11741	13	4085,5739,6118,6629,6631,6635,50660,	99	140	105	54	130	65	102	152	82	80	86	109	131	83	111	134
Ferrochelatase, mitochondrial precursor,ferrochelatase isoform a precursor,	FECH,	IPI00027776,IPI00554589,	ENSP00000262093,ENSP00000372326,	NP_000131,NP_001012533,	P22830,	AESLNGNPLFSK, GDPYPQEVSATVQK, LLDELSPNTAPHK, SEVVILFSAHSLPMSVVNR, TGILMLNMGGPETLGDVHDFLLR	423, 429	47861.77,48624.58,	0.19015	8.90812	5	4325,5506,5739,6091,6783,9416,9589,16020,51537,		6	5		2	5	7	6					7		4	9
Isoform 1 of Very long-chain specific acyl-CoA dehydrogenase, mitochondrial precursor,	ACADVL,	IPI00028031,	ENSP00000325395,ENSP00000349297,	NP_000009,	P49748-1,	AGLGSGLSLSGLVHPELSR, ALEQFATVVEAK, ASNTAEVFFDGVR, EGMAALQSDPWQQELYR, EKITAFVVER, ELGAFGLQVPSELGGVGLCNTQYAR, ELSGLGSALK, ELVEPVSR, FFEEVNDPAK, FFEEVNDPAKNDALEMVEETTWQGLK, FGMAAALAGTMR, GFGGITHGPPEK, GFGGITHGPPEKK, GGVVTSNPLGF, GILLFGTK, GIVNEQFLLQR, GKELSGLGSALK, GQLTTDQVFPYPSVLNEEQTQFLK, IFEGTNDILR, IFGSEAAWK, IHNFGLIQEK, IREGMAALQSDPWQQELYR, ITAFVVER, KGIVNEQFLLQR, LADGAIDLYAMVVVLSR, LASGETVAAFC…	701	75208.82,	0.586305	9.48874	36	4466,5739,6118,6629,6631,6635,8152,15980,16020,50660,	393	314	319	356	365	195	315	205	279	297	183	270	375	292	376	333
Transmembrane emp24 domain-containing protein 10 precursor,	TMED10,	IPI00028055,	ENSP00000303145,	NP_006818,	P49755,	DLLVTGAYEISDQSGGAGGLR, IPDQLVILDMK, ITDSAGHILYSK, LEDLSESIVNDFAYMK, RLEDLSESIVNDFAYMK	219	24975.69,	0.278539	7.55286	5	5515,5792,5793,5801,6888,15031,16020,16021,42589,45055,48199,	4	7	4			5			4	6		9				6
Cathepsin G precursor,	CTSG,	IPI00028064,	ENSP00000216336,	NP_001902,	P08311,	TIQNDIMLLQLSR, VSSFLPWIR	255	28836.99,	0.0862745	11.6926	2	4261,5626,6508,6955,8233,											11				6
EPB42 protein,Isoform Long of Erythrocyte membrane protein band 4.2,Isoform Short of Erythrocyte membrane protein band 4.2,	EPB42,	IPI00028120,IPI00028614,IPI00619961,IPI00827872,	ENSP00000300215,	NP_000110,	P16452-1,P16452-2,	AVQLAIGVQAVHYNGVLAAK, FQFTPTHVGLQR, GDAQISVTLVNHSEQEK, TQATFPISSLGDR, VALTAQTGEQPSK, VLGALLHFLK, VLPTPQTQATQEGALLNK, VVTTFASAQGTGGR	721, 691, 619, 691	79890.66,77008.5,69454.89,76972.42,	0.172482	8.19471	8	3810,5200,5515,5524,5737,5856,5886,8360,18149,43249,			4										11		8
Isoform 1 of NADH dehydrogenase [ubiquinone] flavoprotein 1, mitochondrial precursor,Isoform 2 of NADH dehydrogenase [ubiquinone] flavoprotein 1, mitochondrial precursor,	NDUFV1,	IPI00028520,IPI00221298,	ENSP00000322450,	NP_009034,	P49821-1,P49821-2,	AAYIYIR, EAYEAGLIGK, GDARPAEIDSLWEISK, GEFYNEASNLQVAIR, GGAGFPTGLK, GGTWFAGFGR, GPDWILGEIK, HAGGVTGGWDNLLAVIPGGSSTPLIPK, HFRPELEER, IFTNLYGR, KTSFGSLKDEDR, PAEIDSLWEISK, RGGTWFAGFGR, TSFGSLKDEDR	464, 455	50816.685,49867.66,	0.293826	8.29317	14	3954,5506,5739,5743,5747,6120,8137,10181,16020,46872,51287,51539,	82	84	83	101	87	29	75	93	87	72	50	76	83	66	83	84
Dolichyl-diphosphooligosaccharide--protein glycosyltransferase 63 kDa subunit precursor,Ribophorin II,Uncharacterized protein RPN2,	RPN2,	IPI00028635,IPI00383680,IPI00552307,IPI00552972,IPI00844076,	ENSP00000237530,ENSP00000345904,ENSP00000362724,ENSP00000362731,ENSP00000362735,	NP_002942,	P04844,	ISTEVGITNVDLSTVDKDQSIAPK, LQVTNVLSQPLTQATVK, SIVEEIEDLVAR, YHVPVVVVPEGSASDTHEQAILR, YIANTVELR	647, 615, 599, 506, 631	71216.55,67722.73,65667.04,56360.035,69283.33,	0.142836	5.76134	5	4579,5515,5783,6464,8250,16020,16021,16740,18279,			3	2								3	4		4	3
NADH dehydrogenase [ubiquinone] 1 alpha subcomplex subunit 3,	NDUFA3,	IPI00028881,	ENSP00000302490,	NP_004533,	O95167,	ATPYNYPVPVR, DDGNMPDVPSHPQDPQGPSLEWLK, YSVMINK	84	9278.785,	0.5	8.9209	3	3954,5739,5747,6120,8137,16020,16021,16491,					19			10		3
NADH dehydrogenase,NADH dehydrogenase [ubiquinone] 1 beta subcomplex subunit 8, mitochondrial precursor,	NDUFB8,	IPI00028883,IPI00642807,	ENSP00000299166,ENSP00000359346,	NP_004995,	O95169,	DMFPGPYPR, DPWYSWDQPGLR, QYPYNNLYLER, SQHERDPWYSWDQPGLR, VEDYEPYPDDGMGYGDYPK	186, 155	21765.665,18478.81,	0.331183	6.01034	5	3954,5739,5747,5783,6118,8137,16020,	25	32	32	30	42	15	30	38	40	27	10	17	26	17	26	25
24 kDa protein,32 kDa protein,Uncharacterized protein KIAA0152 precursor,	KIAA0152,	IPI00029046,IPI00791526,IPI00793364,	ENSP00000228506,	NP_055545,	Q14165,	KEEEEEEEEYDEGSNLKK, LSVQGEVSTFTGK, SNPEDQILYQTER	292, 209, 290	32233.645,23922.07,32075.495,	0.170979	4.98695	3	16020,16021,		3	5				3		2	3		3	2		4
ATP synthase B chain, mitochondrial precursor,	ATP5F1,	IPI00029133,	ENSP00000358737,	NP_001679,	P24539,	EQEHMINWVEK, HVVQSISTQQEK, HVVQSISTQQEKETIAK, HYLFDVQR, KYGPFVADFADK, KYGPFVADFADKLNEQK, LAQLEEAK, LDYHISVQNMMR, NNIAMALEVTYR, NRLDYHISVQNMMR, QASIQHIQNAIDTEK, RHYLFDVQR, RKEQEHMINWVEK, SQQALVQK, TGVTGPYVLGTGLILYALSK, YGLIPEEFFQFLYPK, YGPFVADFADK, YGPFVADFADKLNEQK	256	28908.465,	0.578125	9.7935	18	5215,5515,5624,5739,5759,6811,15986,15992,16469,45263,46933,46961,	241	253	342	189	285	132	203	163	233	248	120	233	191	182	401	210
Cytochrome c1 heme protein, mitochondrial precursor,	CYC1,	IPI00029264,	ENSP00000317159,	NP_001907,	P08574,	AANNGALPPDLSYIVR, ELAAEVEVQDGPNEDGEMFMR, ELAAEVEVQDGPNEDGEMFMRPGK, GLLSSLDHTSIR, GLLSSLDHTSIRR, HGGEDYVFSLLTGYCEPPTGVSLR, LFDYFPK, LFDYFPKPYPNSEAAR, MLMMMALLVPLVYTIK	325	35389.55,	0.335385	9.24651	9	5506,5739,5746,6118,6810,16020,16021,20037,45155,46872,	246	266	226	254	274	148	243	186	282	206	109	264	216	182	232	190
GrpE protein homolog 1, mitochondrial precursor,	GRPEL1,	IPI00029557,	ENSP00000264954,ENSP00000371995,	NP_079472,	Q9HAV7,	DLLEVADVLEK, FDPYEHEALFHTPVEGK, NLYEGLVMTEVQIQK, TLRPALVGVVK, VKLEEQLKETVEK	217	24278.92,	0.308756	8.31367	5	774,5739,5759,6457,30150,42803,51082,51087,	6	6			6		3		6	5		4	3			3
NADH dehydrogenase [ubiquinone] 1 subunit C2,	NDUFC2,	IPI00029558,	ENSP00000281031,	NP_004540,	O95298,	EDYLYAVR, LHPEDFPEEDKK, REDYLYAVR, RRPIATAGLHR, TYGEIFEK	119	14187.33,	0.336135	9.26617	5	3954,5737,5739,5743,5747,6120,8137,16020,16491,	10	8	7	9	9	5	4	5	6	6	2	7	4	2	6	4
NADH dehydrogenase [ubiquinone] 1 alpha subcomplex subunit 10, mitochondrial precursor,	NDUFA10,	IPI00029561,	ENSP00000252711,	NP_004535,	O95299,	FEVLNYTSIPIFLPEVTIGAHQTDR, ITSAYLQDIENAYK, ITSAYLQDIENAYKK, KVVEDIEYLK, KYSPGYNTEVGDK, LLQYSDALEHLLTTGQGVVLER, LQSWLYSSR, VVEDIEYLK, YGMWHFLLGDK, YSPGYNTEVGDK	355	40750.28,	0.295775	8.68073	10	3954,5524,5739,5747,6091,6120,6139,8137,16491,16773,	43	50	33	47	77	24	51	46	58	62	33	52	60	24	27	41
Cob,	MMAB,	IPI00029665,	ENSP00000266839,	NP_443077,	Q96EY8,	AGPILELEQWIDK, GFSSTFTGER, LSDYLFTLAR, VVPLVQMGETDANVAK	250	27387.975,	0.196	8.78295	4	5524,5739,8817,9236,16740,	2	4		3		3	5		6	5		6	4		7
Single-stranded DNA-binding protein, mitochondrial precursor,	SSBP1,	IPI00029744,	ENSP00000265304,	NP_003134,	Q04837,	NPVTIFSLATNEMWR, QATTIIADNIIFLSDQTK, RQATTIIADNIIFLSDQTK, SGDSEVYQLGDVSQK, VGQDPVLR	148	17259.575,	0.385135	10.0411	5	3677,3697,5739,6260,	18	29	14	6	12	8	12	9	14	25	5	20	9	9	12	11
40S ribosomal protein S24. Isoform 2,Isoform 1 of 40S ribosomal protein S24,Isoform 2 of 40S ribosomal protein S24,	RPS24,	IPI00029750,IPI00219486,IPI00847986,	ENSP00000354074,ENSP00000361430,ENSP00000361435,	NP_001017,NP_148982,	P62847-1,P62847-2,	TTGFGMIYDSLDYAK, TTPDVIFVFGFR	133, 143, 130	15423.15,16506.55,15068.745,	0.199837	11.4894	2	166,3735,5622,5840,5843,6412,		5							6
24 kDa protein,29 kDa protein,60S ribosomal protein L7,RPL7 protein,	RPL7,	IPI00030179,IPI00398699,IPI00472171,IPI00794746,	ENSP00000305052,ENSP00000339795,	NP_000962,	P18124,	IALTDNALIAR, KTTHFVEGGDAGNREDQINR, TTHFVEGGDAGNREDQINR	248, 248, 318, 208	29225.565,29211.545,37021.965,24432.785,	0.124131	11.3174	3	3735,5622,5840,5842,6412,15934,30528,		2										4			4
Heat shock protein 75 kDa, mitochondrial precursor,	TRAP1,	IPI00030275,	ENSP00000246957,	NP_057376,	Q12931,	AFLDALQNQAEASSK, AQLLQPTLEINPR, EGIVTATEQEVK, EGIVTATEQEVKEDIAK, ELGSSVALYSR, ELISNASDALEK, ELLQESALIR, GTITIQDTGIGMTQEELVSNLGTIAR, GVVDSEDIPLNLSR, YESSALPSGQLTSLSEYASR	704	80109.175,	0.196023	8.3988	10	166,5164,5524,5575,5739,6457,8150,51082,	12	8	7	9	20	3	13	11	7	11		16	21	8	9	9
Acetyl-CoA acetyltransferase, mitochondrial precursor,	ACAT1,	IPI00030363,	ENSP00000265838,	NP_000010,	P24752,	DGLTDVYNK, EAYMGNVLQGGEGQAPTR, EEVKEAYMGNVLQGGEGQAPTR, ENGTVTAANASTLNDGAAALVLMTADAAK, EVVIVSATR, FGNEVIPVTVTVK, GQPDVVVKEDEEYK, GQPDVVVKEDEEYKR, GSTPYGGVKLEDLIVK, IVAFADAAVEPIDFPIAPVYAASMVLK, IVGHLTHALK, LEDLIVK, LEDLIVKDGLTDVYNK, LGSIAIQGAIEK, LNVTPLAR, MLEIDPQK, MLEIDPQKVNINGGAVSLGHPIGMSGAR, NEQDAYAINSYTR, QAVLGAGLPISTPCTTINK, RLNVTPLAR, TPIGSFLGSLSLLPATK, VNINGGAVSLGHPIGMSGAR	427	45199.2,	0.580796	9.21121	22	3985,5515,5739,8415,16740,	236	331	342	225	351	231	278	292	364	219	149	261	297	223	292	316
Isoform 1 of Isocitrate dehydrogenase [NAD] subunit alpha, mitochondrial precursor,	IDH3A,	IPI00030702,	ENSP00000299518,	NP_005521,	P50213-1,	APIQWEER, DMANPTALLLSAVMMLR, ENTEGEYSGIEHVIVDGVVQSIK, HMGLFDHAAR, IAEFAFEYAR, MSDGLFLQK, NVTAIQGPGGK, TPIAAGHPSMNLLLR, TPYTDVNIVTIR	366	39591.365,	0.314208	6.92491	9	287,4449,5739,5975,6099,8152,16491,16616,30145,	26	35	22	18	37	9	42	39	57	42	23	38	54	16	26	26
30 kDa protein,39S ribosomal protein L47, mitochondrial precursor,MRPL47 protein,	MRPL47,	IPI00030820,IPI00745964,IPI00794978,	ENSP00000259038,ENSP00000372089,	NP_065142,	Q9HD33,	FFALPYVDHFLR, GLEEFFDDPK, NMLLTLEQEAK	252, 252, 230	29577.155,29786.385,27085.415,	0.135128	11.0409	3	3735,5575,5739,5761,6412,8150,30529,	5	10	5	7	8	3		2	9	8		6	2	5	4	3
Transmembrane protein 126A,	TMEM126A,	IPI00031064,	ENSP00000306887,	NP_115649,	Q9H061,	ALQLSEPGKEIH, ENITIVDISR, GNILSYWIR, IAAGLPMAGIPFLTTDLTYR, KINQLPEAER, SGLTGLVIGGLYPVFLAIPVNGGLAAR, SNNKENITIVDISR, YQSALLPHK	195	21527,	0.517949	9.61947	8	5739,16020,16021,	19	26	2	4	15		13	6	20	23		18	21			3
Trifunctional enzyme subunit alpha, mitochondrial precursor,	HADHA,	IPI00031522,	ENSP00000288682,ENSP00000370023,	NP_000173,	P40939,	ADMVIEAVFEDLSLK, ALTSFER, DATLTALDR, DGPGFYTTR, DLNSDMDSILASLK, DSIFSNLTGQLDYQGFEK, DTSASAVAVGLK, ELHSEFSEVMNEIWASDQIR, FGELVMTK, FGGGNPELLTQMVSK, FVDLYGAQK, GFYIYQEGVK, GFYIYQEGVKR, HLAILGAGLMGAGIAQVSVDK, ILQEGVDPK, KLDSLTTSFGFPVGAATLVDEVGVDVAK, KMGLVDQLVEPLGPGLKPPEER, KTVLGTPEVLLGALPGAGGTQR, LDSLTTSFGFPVGAATLVDEVGVDVAK, LPPKSEVSSDEDIQFR, LTAYAMTIPFVR, MGLVDQLVEPLGPGLKPPEER, MQLLEIITTEK, MVGVPAA…	763	82998.97,	0.453473	9.51571	30	3857,3985,4300,5739,5743,6629,6631,6635,8152,16491,16507,16509,16829,50662,	414	496	384	577	471	239	493	524	430	328	377	449	726	462	505	563
OTTHUMP00000016217,Uncharacterized protein C6orf125,	C6orf125,	IPI00031617,IPI00514293,	ENSP00000363331,ENSP00000363348,	NP_115716,	Q9BRT2,	DTSFSGLSLEEYK, LILSTDTLEELK, LILSTDTLEELKEIDK	126, 101	14874.665,11909.38,	0.258644	7.97348	3	0,	3	4			2		2	3	3	2		4	2
Transmembrane protein 38A,	TMEM38A,	IPI00031641,	ENSP00000187762,	NP_076979,	Q9H6F2,	GSGVALMSNFEQLLR, GVWKPETNEILHMSFPTK	299	33259.61,	0.110368	8.40527	2	16020,16021,	7	12			5		11
19 kDa protein,60S ribosomal protein L9,	RPL9,	IPI00031691,IPI00795717,	ENSP00000330879,ENSP00000346022,ENSP00000347751,ENSP00000350373,ENSP00000368515,	NP_000652,NP_001020092,	P32969,	FLDGIYVSEK, KFLDGIYVSEK, TILSNQTVDIPENVDITLK	192, 165	21863.285,19062.24,	0.169034	10.864	3	3735,5622,5840,6412,		4				3	4		5	4		4			2
Transmembrane protein 109 precursor,	TMEM109,	IPI00031697,	ENSP00000227525,	NP_076997,	Q9BVC6,	EAPVDVLTQIGR, REAPVDVLTQIGR	243	26209.64,	0.0534979	11.0932	2	16020,16021,16529,	10
CSDA protein variant (Fragment),Isoform 1 of DNA-binding protein A,Isoform 2 of DNA-binding protein A,Isoform 3 of DNA-binding protein A,	CSDA,	IPI00031801,IPI00219147,IPI00219148,IPI00555698,	ENSP00000228251,ENSP00000279550,	NP_003642,	P16989-1,P16989-2,P16989-3,	GAEAANVTGPDGVPVEGSR, SVGDGETVEFDVVEGEK	372, 303, 342, 134	40089.685,31946.88,37020.455,14786.425,	0.147376	10.1477	2	122,3677,3702,3714,5737,6350,6355,9409,						4	10	4		3
Isoform 1 of Voltage-dependent anion-selective channel protein 3,Isoform 2 of Voltage-dependent anion-selective channel protein 3,	VDAC3,	IPI00031804,IPI00294779,	ENSP00000022615,	NP_005653,	Q9Y277-1,Q9Y277-2,	AADFQLHTHVNDGTEFGGSIYQK, GYGFGMVK, IETSINLAWTAGSNNTR, LSQNNFALGYK, LTLDTIFVPNTGK, LTLDTIFVPNTGKK, LTLSALIDGK, SKLSQNNFALGYK, VNNASLIGLGYTQTLR, VNNASLIGLGYTQTLRPGVK, WNTDNTLGTEISWENK	283, 284	30658.45,30789.645,	0.426809	8.9017	11	5515,5739,5741,5887,6820,8308,15288,15482,15853,16020,19867,	294	357	279	297	395	225	365	294	350	294	221	350	290	236	252	300
Cystatin-A,	CSTA,	IPI00032325,	ENSP00000264474,	NP_005204,	P01040,	IPGGLSEAKPATPEIQEIVDK, PATPEIQEIVDK, SLPGQNEDLVLTGYQVDK, TQVVAGTNYYIK	98	11006.465,	0.520408	5.1669	4	1533,4869,5198,5622,5737,18149,30216,30674,					2	9		3			7	3		2		3
aspartate beta-hydroxylase isoform d,aspartate beta-hydroxylase isoform e,	ASPH,	IPI00032450,IPI00783617,	ENSP00000373855,ENSP00000373856,ENSP00000373857,ENSP00000373858,	NP_064549,NP_115856,		LGIYDADGDGDFDVDDAK, VLLEGPSGVAK	210, 225	23795.815,25559.81,	0.133492	10.3464	2	4597,5506,30176,	18	34	21	25	15	20	41		11	34	15	44	37	10	35	33
Ubiquinone biosynthesis monooxygenase COQ6,	COQ6,	IPI00032633,	ENSP00000333946,	NP_872282,	Q9Y2Z9,	DLGSVSHLTGYETER, HNTALLAATDLLK, HNTALLAATDLLKR, ILLLEAGPK, LLIGADGHNSGVR, LYSTSASPLVLLR, TWGLQATNAVSPLK, VALIGDAAHR, VHPLAGQGVNMGFGDISSLAHHLSTAAFNGK	468	50869.415,	0.254273	7.32022	9	4497,5739,6118,6725,6744,8152,15997,50660,	16	13	21	14	10	4	16	9	17	13		13	16	7	17	18
Methionine-R-sulfoxide reductase B2,Uncharacterized protein MSRB2,	MSRB2,	IPI00032871,IPI00743141,	ENSP00000277598,ENSP00000365693,ENSP00000365696,	NP_036360,	Q9Y3D2,	EKGTEPPFSGIYLNNK, GTEPPFSGIYLNNK, KLTPEQFYVTR, LTPEQFYVTR	201, 159	21468.14,17100.66,	0.15207	9.81244	4	3700,5739,8113,8270,16491,30091,	6		6	3	8		8	4	6	6		6	5		5
28S ribosomal protein S16, mitochondrial precursor,	MRPS16,	IPI00032872,	ENSP00000362036,	NP_057149,	Q9Y3D3,	FVEQLGSYDPLPNSHGEK, LLGLAGFFPLHPMMITNAER, LVALNLDR	137	15344.69,	0.335766	9.95916	3	3735,5622,5739,5763,5840,6412,	7	7				2			5	6
Isoform 1 of Electron transfer flavoprotein-ubiquinone oxidoreductase, mitochondrial precursor,	ETFDH,	IPI00032875,	ENSP00000303552,	NP_004444,	Q16134-1,	ALNEGGFQSIPK, ELFPDWK, ELWVIDEK, FAEEADVVIVGAGPAGLSAAVR, FGILTEK, GAPLNTPVTEDR, GIATNDVGIQK, IPVPILPGLPMNNHGNYIVR, ITTHYTIYPR, NLSIYDGPEQR, SGILAAESIFNQLTSENLQSK, TIGLHVTEYEDNLK, VDHTVGWPLDR, YRIPVPILPGLPMNNHGNYIVR	617	68507.01,	0.272285	7.59358	14	4174,5506,5624,5739,5743,6118,6810,9054,16020,16021,16491,46872,51539,	32	24	21	38	59	13	36	19	25	27	9	24	33	19	32	26
Mitochondrial ribosomal protein S23,	MRPS23,	IPI00032881,	ENSP00000320184,	NP_057154,	Q9Y3D9,	AFDLFNPNFK, ALLAEGVILR, LETVGSIFSR, LGETDEEKLFVETGK	190	21770.495,	0.236842	9.32534	4	5739,30529,	3			3	4		3			2		3
Prolactin regulatory element-binding protein,	PREB,	IPI00033349,	ENSP00000260643,ENSP00000369595,	NP_037520,	Q9HCU5,	FGQVPDQPAGLR, VENLQAVQTDFSSDPLQK	417	45467.81,	0.0719425	7.95241	2	3677,5634,5783,6350,6355,6888,15031,16020,16021,		2														2
GRHPR protein (Fragment),Glyoxylate reductase/hydroxypyruvate reductase,	GRHPR,	IPI00037448,IPI00550682,	ENSP00000313432,	NP_036335,	Q9UBQ7,	GDVVNQDDLYQALASGK, IAAAGLDVTSPEPLPTNHPLLTLK, MKETAVFINISR, NTMSLLAANNLLAGLR, RLPEAIEEVK, VISTMSVGIDHLALDEIK	328, 341	35667.875,36823.82,	0.290095	6.87335	6	5575,5737,6118,7588,8152,16616,30267,48037,51287,	6	10	5	8	11	7	10	9	7	9	4	7	7	8	5	8
20 kDa protein,Isoform 1 of Apolipoprotein O precursor,	APOO,	IPI00042580,IPI00843886,	ENSP00000368528,	NP_077027,	Q9BUR5-1,	GYIVIEDLWK, LGVIGFAGLIGLLLAR, LYDWGLR, MQSLVQWGLDSYDYLQNAPPGFFPR, SQLEESISQLR, VDELSLYSVPEGQSK	198, 178	22284.495,20079.815,	0.448076	9.18829	6	5319,6869,16020,16021,	38	31	30	36	31	22	28	22	36	33	16	28	22	22	28	20
Glycophorin Erik (STA) precursor,Glycophorin Erik I-IV precursor,Glycophorin Mz II-V,Glycophorin-A precursor,	GYPA,	IPI00043073,IPI00178745,IPI00298800,IPI00384414,	ENSP00000306419,ENSP00000324483,ENSP00000354003,	NP_002090,	P02724,	KSPSDVKPLPSPDTDVPLSSVEIENPETSDQ, SPSDVKPLPSPDTDVPLSSVEIENPETSDQ	118, 105, 150, 85	12761.525,11272.9,16273.265,9331.81,	0.282331	5.05734	2	3674,5575,8150,16020,													3
Cytochrome oxidase c, subunit VIb family protein,Isoform 1 of Uncharacterized protein C1orf31,Isoform 2 of Uncharacterized protein C1orf31,Isoform 3 of Uncharacterized protein C1orf31,	C1orf31,	IPI00045660,IPI00552131,IPI00646750,IPI00830136,	ENSP00000355571,ENSP00000355572,ENSP00000355574,	NP_001013003,	Q5JTJ3-1,Q5JTJ3-2,Q5JTJ3-3,	EKFEAGQFEPSETTAK, FEAGQFEPSETTAK	125, 155, 79, 156	14115.95,18006.5,9427.53,18093.575,	0.13408	9.44747	2	4129,5739,6118,													4
Coiled-coil domain-containing protein 58,	CCDC58,	IPI00046828,	ENSP00000291458,	NP_001017928,	Q4VC31,	EKNLDDLTLLK, IVHELNTTVPTASFAGK, NLDDLTLLK, WMQSELNVEEVVNDR	144	16619.905,	0.298611	7.95789	4	0,	4	4			2		4	3	5	5	2	3	5			4
H2A histone family, member Y isoform 2,Isoform 1 of Core histone macro-H2A.1,Isoform 2 of Core histone macro-H2A.1,	H2AFY,	IPI00059366,IPI00304171,IPI00744148,	ENSP00000302572,ENSP00000310169,ENSP00000353806,	NP_001035248,NP_004884,NP_613075,NP_613258,	O75367-1,O75367-2,	GVTIASGGVLPNIHPELLAK, HILLAVANDEELNQLLK	371, 372, 369	39488.51,39616.685,39183.18,	0.0998213	10.4953	2	786,793,1740,3677,3682,5634,6334,7001,7549,16568,	11							3	5	6			3
ADP-ribosylation factor-like protein 8A,	ARL8A,	IPI00060031,	ENSP00000272217,	NP_620150,	Q96BM9,	DLPGALDEKELIEK, GVSAIVYMVDAADQEK, MNLSAIQDR	186	21415.715,	0.209677	7.93076	3	166,3924,5525,5622,5737,5764,5768,7059,7264,16020,30496,43014,48487,51233,										4					4
Isoform 1 of Ribosome recycling factor, mitochondrial precursor,Isoform 3 of Ribosome recycling factor, mitochondrial precursor,	MRRF,	IPI00061108,IPI00556600,	ENSP00000297908,ENSP00000343867,ENSP00000362834,	NP_620132,	Q96E11-1,Q96E11-3,	ESGMNLNPEVEGTLIR, LALNQISQISMK, QISQMADDTVAELDR, SVIEALKDNFNK	262, 218	29276.825,24114.795,	0.231109	10.4279	4	5739,6412,	4	4	8	8	9	6	6	4	6	6		9	3	5	11	4
Mitochondrial 28S ribosomal protein S10,	MRPS10,	IPI00061245,	ENSP00000053468,	NP_060611,	P82664,	AVLDSYEYFAVLAAK, DLTKPVVTISDEPDILYK, DLTKPVVTISDEPDILYKR, FTLLQSVHIYK, NLPEGVAMEVTK	201	22999.33,	0.283582	8.22043	5	3674,3735,5622,5739,5761,5840,6412,8150,	6	4			5		3		6			4	4		4	5
Uncharacterized protein USMG5P1,Up-regulated during skeletal muscle growth protein 5,	USMG5,	IPI00063903,IPI00640630,	ENSP00000311245,ENSP00000337705,ENSP00000358826,ENSP00000358830,ENSP00000358840,ENSP00000362589,	NP_116136,	Q96IX5,	AGPESDAQYQFTGIK, AGPESDAQYQFTGIKK, KYFNSYTLTGR, MAGPESDAQYQFTGIK, YFNSYTLTGR	58, 58	6457.515,6616.765,	0.465517	10.301	5	16020,16021,	24	23	56	39	46	13	45	49	28	20	14	52	44	19	59	44
Isoform 1 of Protein COQ10 A, mitochondrial precursor,Isoform 2 of Protein COQ10 A, mitochondrial precursor,coenzyme Q10 homolog A isoform b,	COQ10A,	IPI00065495,IPI00152070,IPI00736624,	ENSP00000257927,ENSP00000312587,	NP_001092807,NP_653177,	Q96MF6-1,Q96MF6-2,	AQLEVGFPPVMER, ELMFHEVHQT, FGPETAIPR, FSPGIPAYPR, IMGYSMQEMYEVVSNVQEYR, QNVAAFER, RIMGYSMQEMYEVVSNVQEYR, SLLHSQLATMFFDEVVK, YTSAVSMVKPHMVK	247, 215, 230	27685.98,24460.29,26120.065,	0.443617	10.1126	9	5739,	57	123	39	39	48	40	39	21	120	37	42	31	49	29	41	16
Junctional sarcoplasmic reticulum protein 1,	JSRP1,	IPI00065501,	ENSP00000300961,	NP_653217,		EAAENDEEEPGEATGEAVR, EAAENDEEEPGEATGEAVREDR, FEAQAPPSAPPAPR, VPEPWVPPSSAPR	331	36318.27,	0.148036	10.1361	4	0,		3	7			2	4		2	3		4	4		5	2
28S ribosomal protein S35, mitochondrial precursor,	MRPS35,	IPI00073779,	ENSP00000081029,	NP_068593,	P82673,	IPNFLHLTPVAIK, MAVDQDWPSVYPVAAPFKPSAVPLPVR, NILETLLQMK, NMEINKEELLGTK	323	36843.95,	0.195046	8.42487	4	5739,5763,30529,42769,43043,									2	3
H2A histone family member J,H2A histone family, member J,Histone H2A type 1,Histone H2A type 1-D,Histone H2A type 1-H,Histone H2A type 1-J,Histone H2A type 2-A,Histone H2A type 2-C,	H2AFJ,HIST1H2AD,HIST1H2AG,HIST1H2AH,HIST1H2AI,HIST1H2AJ,HIST1H2AK,HIST1H2AL,HIST1H2AM,HIST2H2AA3,HIST2H2AA4,HIST2H2AC,	IPI00081836,IPI00102165,IPI00216457,IPI00220855,IPI00255316,IPI00291764,IPI00339274,IPI00552873,	ENSP00000228929,ENSP00000328484,ENSP00000328644,ENSP00000330307,ENSP00000332194,ENSP00000332682,ENSP00000341094,ENSP00000349873,ENSP00000351589,ENSP00000352119,ENSP00000352627,ENSP00000358145,ENSP00000358155,ENSP00000358158,ENSP00000366569,ENSP00000366605,ENSP00000366679,ENSP00000373730,ENSP00000373731,	NP_001035807,NP_003500,NP_003501,NP_003502,NP_003505,NP_003507,NP_003508,NP_066408,NP_066409,NP_066544,NP_542163,NP_808760,	P0C0S8,P20671,Q16777,Q6FI13,Q96KK5,Q99878,	NDEELNKLLGK, VTIAQGGVLPNIQAVLLPK	128, 155, 130, 129, 130, 130, 129, 128	13906.145,16610.14,14095.385,14019.3,14107.375,14091.375,13988.26,13936.175,	0.227465	11.462	2	786,3677,5634,5694,6334,7001,	126	54	53	62	40	42	70	100		67	6	56	59
34 kDa protein,Isoform 1 of Mitochondrial 39S ribosomal protein L39,Isoform 2 of Mitochondrial 39S ribosomal protein L39,	MRPL39,	IPI00084571,IPI00295427,IPI00794240,	ENSP00000284967,ENSP00000305682,	NP_059142,NP_542984,	Q9NYK5-1,Q9NYK5-2,	DLPFETLEVEAK, FQGVSLPVHLR	353, 338, 297	40467.6,38721.475,34032.21,	0.0702147	8.00144	2	3674,5739,5761,8150,30529,															4
Coproporphyrinogen III oxidase, mitochondrial precursor,	CPOX,	IPI00093057,	ENSP00000264193,	NP_000088,	P36551,	AGVSISVVHGNLSEEAAK, EAEILEVLR, IESILMSLPLTAR	454	50151.605,	0.0881057	8.32817	3	4109,5739,6783,16491,			3		2
GNAS complex locus,GNAS complex locus isoform f,Isoform 3 of Guanine nucleotide-binding protein G(s) subunit alpha isoforms short,Isoform Gnas-1 of Guanine nucleotide-binding protein G(s) subunit alpha isoforms short,Isoform Gnas-2 of Guanine nucleotide-binding protein G(s) subunit alpha isoforms short,Isoform XLas-1 of Guanine nucleotide-binding protein G(s) subunit alpha isoforms XLas,Isoform X…	GNAS,	IPI00095891,IPI00219835,IPI00514055,IPI00640867,IPI00644474,IPI00644936,IPI00646491,IPI00792774,	ENSP00000265620,ENSP00000265621,ENSP00000302237,ENSP00000360115,ENSP00000360123,ENSP00000360126,ENSP00000360136,ENSP00000360139,ENSP00000360141,ENSP00000360142,ENSP00000360143,	NP_000507,NP_001070956,NP_001070957,NP_536350,NP_536351,	P63092-1,P63092-2,P63092-3,Q5JWF2-1,Q5JWF2-2,	LQEALNLFK, QDLLAEK, VLTSGIFETK	1037, 380, 394, 395, 721, 379, 1023, 736	111023.29,44265.845,45664.205,45751.28,78733.08,44178.77,109624.93,80218.515,	0.0488388	5.46207	3	138,4871,5515,5525,5737,5834,5886,6894,7165,7186,7190,7608,													2		3
Succinyl-CoA ligase [GDP-forming] beta-chain, mitochondrial precursor,	SUCLG2,	IPI00096066,	ENSP00000307432,	NP_003839,	Q96I99,	EQIDIFEGIK, ETYLAILMDR, FFVADTANEALEAAK, FFVADTANEALEAAKR, ILNNSGLPITSAIDLEDAAK, ILNNSGLPITSAIDLEDAAKK, INFDDNAEFR, LYNLFLK, MAENLGFVGPLK, PANFLDLGGGVK	432	46510.215,	0.226852	6.17712	10	4776,5524,5739,6099,6104,8152,16874,	10	5	13	13	9	5	10	15	16	2	2	6	6	6	12	6
oxoglutarate (alpha-ketoglutarate) dehydrogenase (lipoamide) isoform 1 precursor,	OGDH,	IPI00098902,	ENSP00000222673,	NP_002532,	Q02218,	DMVGQVAITR, FEEFLQR, GHHVAQLDPLGILDADLDSSVPADIISSTDK, GSLAAVAHAQSLVEAQPNVDK, GSLAAVAHAQSLVEAQPNVDKLVEDHLAVQSLIR, HWLDSPWPGFFTLDGQPR, IEQLSPFPFDLLLK, KPLIIFTPK, LEAADEGSGDVK, LGFYGLDESDLDK, LLDTAFDLDVFK, LNVLANVIR, LVEDHLAVQSLIR, NITLSLVANPSHLEAADPVVMGK, NQGYYDYVKPR, NTNAGAPPGTAYQSPLPLSR, QILLPFR, SSFDEMLPGTHFQR, SSPYPTDVAR, SWDIFFR, TVDWALAEYMAFGSLLK, VFHLPTTTFIGGQESALPLR, VIPEDGPAAQNPENVK, VIPED…	1023	115934.37,	0.339198	6.85526	27	4591,5739,6091,6096,9353,16491,30976,	54	32	44	91	112	21	66	63	70	34	46	97	119	37	65	50
20 kDa protein,39S ribosomal protein L40, mitochondrial precursor,	MRPL40,	IPI00099871,IPI00852745,	ENSP00000333401,	NP_003767,	Q9NQ50,	AMLEAQQEALEELQLESPK, ATQELIPIEDFITPLK	206, 162	24490.135,19541.435,	0.192976	10.172	2	3674,5634,5739,5761,9653,30529,		11			9		5		8			12	7
Thioredoxin domain-containing protein 13 precursor,	TXNDC13,	IPI00100247,	ENSP00000246024,	NP_066979,	Q9H1E5,	FFVTTLPAFFHAK, GPGIFEDLQNYILEK, NGEILQISVGK, VDVIQEPGLSGR	349	38951.85,	0.146132	4.02443	4	6118,6810,16020,16021,45454,		3								3		7
EH domain-containing protein 2,	EHD2,	IPI00100980,	ENSP00000263277,	NP_055416,	Q9NZN4,	LEISDEFSEAIGALR, LFELEEQDLFR, LLEALDEMLTHDIAK, VYIGSFWSQPLLVPDNR	543	61160.89,	0.106814	6.42162	4	166,3676,3924,5509,5524,5525,5624,5634,5886,6897,19904,30866,		4		2	5		6	4	7		2	5	3			3
Aldehyde dehydrogenase X, mitochondrial precursor,	ALDH1B1,	IPI00103467,	ENSP00000366927,	NP_000683,	P30837,	EAGFPPGVVNIITGYGPTAGAAIAQHMDVDK, EEIFGPVQPLFK, GFFIKPTVFGGVQDDMR, IAKEEIFGPVQPLFK, KVGNPFELDTQQGPQVDKEQFER, LAPALATGNTVVMK, LLNLLADLVER, TFVEESIYNEFLER, VAEQTPLSALYLASLIK, VAFTGSTEVGHLIQK, VGNPFELDTQQGPQVDKEQFER, VLGYIQLGQK, VYLASLETLDNGKPFQESYALDLDEVIK, YGLAAAVFTR	517	57237.99,	0.396518	6.78643	14	4028,4029,5739,5975,8152,16491,	16	22	27	14	17	5	24	23	22	7		26	27	25	13	12
16 kDa protein,Signal peptidase complex catalytic subunit SEC11A,	SEC11A,	IPI00104128,IPI00790799,	ENSP00000268220,	NP_055115,	P67812,	GDLLFLTNR, MLSLDFLDDVRR, VGEIVVFR	179, 139	20625.2,16093.13,	0.185322	9.70234	3	5783,5792,6465,6508,8236,16020,16021,		4
NADP(H)-dependent retinol dehydrogenase/reductase B1 isoform,peroxisomal short-chain alcohol dehydrogenase,similar to peroxisomal short-chain alcohol dehydrogenase isoform 6,similar to peroxisomal short-chain alcohol dehydrogenase isoform 8,	DHRS4,LOC731356,	IPI00106913,IPI00787453,IPI00788129,IPI00852818,	ENSP00000326219,	NP_066284,XP_001133105,XP_001133116,	Q9BTZ2-1,	TLAIELAPR, VALVTASTDGIGFAIAR	278, 242, 276, 244	29536.885,26129.205,29784.365,25881.725,	0.100431	9.7356	2	5739,5777,6118,8152,16491,		4	3		4		5		5			3
Isoform 1 of Transmembrane protein 70,	TMEM70,	IPI00106966,	ENSP00000312599,	NP_060336,	Q9BUB7-1,	AITYNAMLAETSTVFHQNDVK, LIYTGNMAR, SLLVNPVLFPNR	260	28969.035,	0.161539	9.16993	3	0,		5		9					8
Methylmalonyl-CoA epimerase, mitochondrial precursor,	MCEE,	IPI00107722,	ENSP00000244217,	NP_115990,	Q96PE7,	DSPIAGFLQK, IGAHGKPVIFLHPK, LNHVAIAVPDLEK, MELLHPLGR, NILGAQVSEAVPLPEHGVSVVFVNLGNTK	176	18748.755,	0.426136	9.6815	5	4493,5739,16853,46491,	9	15	12		13	4	9	9	19	10		13		9	11
Putative transferase C1orf69, mitochondrial precursor,	C1orf69,	IPI00145260,	ENSP00000355672,	NP_001010867,	Q5T440,	AGAAAILIR, AGQGNVGLALLWSEK, AGYAHFLNVQGR, DLPPGVALPLESNLAFMNGVSFTK, FLDPLPTSGITPGATVLTASGQTVGK, GPDAAPFLLGLLTNELPLPSPAAAGAPPAAR, KVTVEPHPELR, LLTQDEGPALVPGGR, VTVEPHPELR	356	38154.615,	0.401685	10.2626	9	4047,5737,6546,	10	9	4	5	8	2	8	9	6	5		6	9	6	10	6
Protein TOMM40-like,	TOMM40L,	IPI00152938,	ENSP00000289918,ENSP00000356966,ENSP00000356967,	NP_115550,	Q969M1,	MPPLPVTLALGAFLNHWR, REEPLPNPGSFDELHR, RPGEEGAILTLAGK	308	33916.585,	0.155844	7.26284	3	3677,5515,5634,5739,5741,5829,6820,8308,15031,16020,16021,16481,19867,43234,		4	2						2			2
Acyl-CoA dehydrogenase family member 9, mitochondrial precursor,CDNA FLJ12506 fis, clone NT2RM2001700, weakly similar to ACYL-COA DEHYDROGENASE, VERY-LONG-CHAIN SPECIFIC,	ACAD9,	IPI00152981,IPI00790834,	ENSP00000312618,	NP_054768,	Q9H845,	FSMGSVVAGLLK, ILLIFEGTNEILR, IPVENILGEVGDGFK, LSEFGLIQEK	621, 498	68759.66,55083.025,	0.0904584	8.00701	4	3995,5739,6118,8152,50660,		2			3
66 kDa protein,Elongation factor G 1, mitochondrial precursor,Uncharacterized protein GFM1,	GFM1,	IPI00154473,IPI00783932,IPI00788871,	ENSP00000264263,ENSP00000374209,ENSP00000374210,	NP_079272,	Q96RP9,	AIYFDGDFGQIVR, SFTPVFLGSALK, VIGVLEPLDPEDYTK, YNVPFLTFINK	753, 751, 591	83630.99,83470.86,66034.22,	0.0739777	7.40024	4	3924,5525,5622,5739,6414,					2							2				2
MACRO domain-containing protein 1,	MACROD1,	IPI00155601,	ENSP00000255681,	NP_054786,	Q9BQ69,	VDLSTSTDWK, YVIHTVGPIAYGEPSASQAAELR	325	35504.7,	0.101539	10.0084	2	5739,	10	12		12	14		7		7	7		14
hypothetical protein LOC23078 isoform a,hypothetical protein LOC23078 isoform b,	RP11125A7.3,	IPI00158296,IPI00376322,	ENSP00000251030,ENSP00000281496,ENSP00000368612,	NP_001009814,NP_055873,		DLLGQDVFLIGPPGPLR, FPTEGLSSVVR	1908, 1039	215067.895,116939.05,	0.020812	7.86068	2	166,5524,16887,																2
HIRA interacting protein 5 isoform 1,HIRA interacting protein 5 isoform 2,	NFU1,	IPI00160021,IPI00455153,	ENSP00000306965,	NP_001002755,NP_056515,	Q9UMS0,	GFEDGIVQLK, IRPTVQEDGGDVIYK, SVFFGPDFITVTK, TMDFPTPAAAFR	230, 254	25923.345,28462.295,	0.207121	4.50845	4	5506,16226,51536,	3	6							2	2		3	3		2
39S ribosomal protein L18, mitochondrial precursor,	MRPL18,	IPI00160421,	ENSP00000356001,	NP_054880,	Q9H0U6,	LQSAMTEGGVVLR, NLELLSVAR	180	20576.385,	0.122222	9.98709	2	3735,5622,5739,5761,5840,6412,45182,	2	3							3			4
similar to CG7601-PA,	DHRS7C,	IPI00163114,	ENSP00000327975,	XP_113912,XP_943583,		AEVEEYDVVISTVSPTFIR, IMDANYFGPITLTK, LENLYDALISVADPSK, LTYGVHPVEVAEEVMR, QEVFMANPIPK, TGQIVLVNNIQGK, VVVITDAISGLGK	305	34143.64,	0.334426	8.63406	7	8152,16491,	6	10	10	11	7	6	11	3	10	11		14	8	12	13	14
Isoform 1 of Uncharacterized protein C6orf136,Isoform 2 of Uncharacterized protein C6orf136,Isoform 3 of Uncharacterized protein C6orf136,	C6orf136,	IPI00163387,IPI00514410,IPI00619974,	ENSP00000293604,ENSP00000365649,ENSP00000365654,ENSP00000365656,ENSP00000372906,ENSP00000372908,ENSP00000373074,ENSP00000373075,	NP_659466,	Q5SQH8-1,Q5SQH8-2,Q5SQH8-3,	LEVLQLTR, LMPSHSPPTPVK, LVGLPVHLLFLR	315, 181, 172	35793.97,21286.56,20489.605,	0.15481	9.32876	3	0,	9	10							9	4			3
3-mercaptopyruvate sulfurtransferase,	MPST,	IPI00165360,	ENSP00000342333,	NP_001013454,NP_001013458,NP_066949,	P25325,	ARPEDVISEGR, DGIEPGHIPGTVNIPFTDFLSQEGLEK, TYEDIKENLESR	297	33178.15,	0.16835	6.58456	3	4792,5737,5759,8272,9440,9636,16740,16784,					4		4	2					4
Polymerase delta-interacting protein 2,	POLDIP2,	IPI00165506,	ENSP00000003607,	NP_056399,	Q9Y2S7,	IFSLSGTLETVR, LENLDSDVVQLR, VLETVGVFEVPK	368	42032.965,	0.0978261	8.81286	3	5739,		3	2							2		2			4	2
LOC197322 protein,	LOC197322,	IPI00166395,IPI00450347,IPI00645533,	ENSP00000320646,ENSP00000367596,	NP_777577,		INVFMAVPTIYTK, LMVSGSAALPLPVLEK	576, 521, 311	64129.635,57845.21,35142.18,	0.066419	8.00936	2	3824,8152,				2	2		2
Isoform 1 of D-2-hydroxyglutarate dehydrogenase, mitochondrial precursor,	D2HGDH,	IPI00166642,	ENSP00000315351,	NP_689996,	Q8N465-1,	DFIMPLDLGAK, LYDIVTDLR	521	56415.58,	0.0383877	8.04464	2	5515,5739,6118,10042,10043,16491,32025,32026,44267,51592,51990,															2
NADH dehydrogenase [ubiquinone] 1 beta subcomplex subunit 4,Putative uncharacterized protein (Fragment),similar to NADH dehydrogenase (ubiquinone) 1 beta subcomplex, 4, 15kDa isoform 1,	LOC727762,NDUFB4,	IPI00166684,IPI00220059,IPI00815735,	ENSP00000184266,	NP_004538,XP_001125898,XP_001125915,	O95168,	EYLLQYNDPNR, GLIENPALLR, RGLIENPALLR, TINVYPNFRPTPK, TLPETLDPAEYNISPETR	120, 129, 119	14026.125,15208.4,13921.01,	0.432632	10.1674	5	5739,5747,6118,6120,6979,8137,16020,	50	52	32	82	67	29	50	34	37	38	21	56	42	48	39	39
Zinc-binding alcohol dehydrogenase domain-containing protein 2,	ZADH2,	IPI00166738,	ENSP00000323678,	NP_787103,	Q8N4Q0,	FTGLESIFR, FVGVNASDINYSAGR, LIVIGFISGYQTPTGLSPVK, SASVQGFFLNHYLSK	377	40140.07,	0.156499	8.32217	4	8270,16491,		3	3	3	3		4	4	3			4	3	2	3	4
Mitochondrial-processing peptidase alpha subunit, mitochondrial precursor,	PMPCA,	IPI00166749,	ENSP00000360782,	NP_055975,	Q10713,	FDSKDEILLTLEK, GKPAVAALGDLTDLPTYEHIQTALSSK, GLDTVVALLADVVLQPR, LTDEEVEMTR, LYLNVLNR	525	58252.37,	0.142857	6.91303	5	4240,5515,5739,5743,6508,8270,	2	5	4		5	2	6					3	2	2	3	3
Zinc finger, CDGSH-type domain 2,	CISD2,	IPI00166865,	ENSP00000273986,	NP_001008389,		HNELTGDNVGPLILK, LPVPESITGFAR	135	15278.05,	0.2	10.2498	2	43234,	4	4						2	2	6			4		2
22 kDa protein,25 kDa protein,GTP-binding protein 10 isoform 2,	GTPBP10,	IPI00167638,IPI00791894,IPI00792449,	ENSP00000222511,	NP_149098,		LIADVGLVGFPNAGK, LLTNFLPLK	387, 236, 210	42932.57,25234.125,22475.125,	0.0926654	10.1342	2	5525,5622,															2
SET and MYND domain-containing protein 1,Uncharacterized protein SMYD1,	SMYD1,	IPI00168081,IPI00784073,	ENSP00000295833,ENSP00000374057,ENSP00000374058,	NP_938015,	Q8NB12,	AYAILLVTHGPSHPITK, LKDDLFLGVK, LYHPNNAQLGMAVMR, QEPVFADTNIYMLR, SEGLYHEVVK	493, 490	56861.92,56616.695,	0.134284	7.0957	5	3677,3714,5515,5634,5737,6338,6350,6355,7507,8270,16481,46872,	6	3	6		3	2	10	3	6	7					3
Isoform 1 of Apolipoprotein A-I-binding protein precursor,Isoform 2 of Apolipoprotein A-I-binding protein precursor,	APOA1BP,	IPI00168479,IPI00848298,	ENSP00000357218,	NP_658985,	Q8NCW5-1,Q8NCW5-2,	EPFHSILSVLK, GNAGGIQPDLLISLTAPK	288, 185	31674.305,20430.55,	0.128726	7.57748	2	5515,5576,8150,							2
Choline dehydrogenase, mitochondrial precursor,	CHDH,	IPI00168603,	ENSP00000319851,	NP_060867,	Q8NE62,	EIFAQEALAPFR, GKELQPGSHIQSDKEIDAFVR, SANPQDHPVIQPNYLSTETDIEDFR, VPTQQEAYQVHVGPMR	594	65401.035,	0.124579	8.46719	4	5739,5743,6066,6118,8812,50660,										2					2
PTC7 protein phosphatase homolog,Putative uncharacterized protein DKFZp686M07120,	PPTC7,	IPI00169326,IPI00478578,	ENSP00000346255,ENSP00000351815,	NP_644812,		DYGVDPSQFSGTLMR, LHTANLGDSGFLVVR, SADVLGVADGVGGWR	304, 304	32645.405,32672.435,	0.148026	4.77359	3	3824,4721,		2										3		2	2
Phosphoglycerate kinase 1,	PGK1,	IPI00169383,	ENSP00000362413,	NP_000282,	P00558,	ALESPERPFLAILGGAK, ITLPVDFVTADKFDENAK, LGDVYVNDAFGTAHR	417	44614.36,	0.119904	8.26812	3	166,4618,5524,5737,6096,16310,16740,									2						2
Isoform 1 of Mitochondrial 28S ribosomal protein S5,	MRPS5,	IPI00169400,	ENSP00000272418,	NP_114108,	P82675-1,	SKEEQEKVEADMIQQR, VSGSINMLSLTQGLFR, YEDHTIFHDISLR	430	48006.135,	0.104651	10.5751	3	3723,3735,5622,5739,5840,6412,			2										2		5	2
26 kDa protein,Mitochondrial 28S ribosomal protein S34,	MRPS34,	IPI00169413,IPI00658155,	ENSP00000177742,	NP_076425,	P82930,	DSQLYAVDYETLTRPFSGR, LPLFGLGR, VRPDYTAQNLDHGK	218, 225	25650.235,26331.87,	0.185148	10.4532	3	5515,5739,30529,	2	3	3						3						5
Isoform 1 of Abhydrolase domain-containing protein 11,Isoform 4 of Abhydrolase domain-containing protein 11,	ABHD11,	IPI00171152,IPI00171692,	ENSP00000222800,	NP_683710,	Q8NFV4-1,Q8NFV4-4,	AINIADELPR, LADEQLSSVIQDMAVR, LIAVDISPVESTGVSHFATYVAAMR, LLDGEAALPAVVFLHGLFGSK, QHLLTNLVEVDGR, TAMLLALQRPELVER, VNLDALTQHLDK	308, 315	33862.675,34689.65,	0.359596	9.76514	7	6725,16787,	8	5	7	3	7	3	5	3	8	3		4	3	2	4	2
Hydroxysteroid dehydrogenase-like protein 1,	HSDL1,	IPI00171459,	ENSP00000219439,	NP_113651,		GLNIILISR, VYAHHAVSTLGISK, WAVVSGATDGIGK	330	37001.435,	0.109091	8.90175	3	5515,8152,16491,					2										2
Isoform 1 of Coiled-coil domain-containing protein 109A,	CCDC109A,	IPI00171573,	ENSP00000362144,	NP_612366,	Q8NE86-1,	DAIAQAEMDLK, DAIAQAEMDLKR, DLLSHENAATLNDVK, LEDLKEQLAPLEK, LRDPLQVHLPLR, LVINDLTYHVRPPK, QEYVYPEAR, VAASTGIDLLLLDDFK, VAIYSPDGVR	351	39866.51,	0.287749	8.84269	9	16020,16021,	20	32	22	8	19	26	22	21	30	35	10	19	18	21	16	27
FUN14 domain containing 2,Uncharacterized protein ENSP00000334771,	FUNDC2,	IPI00171761,IPI00171769,IPI00552881,	ENSP00000334771,ENSP00000347675,ENSP00000358510,	NP_076423,		KLFGQESGPSAEK, LFGQESGPSAEK, SKAEEVVSFVK	189, 189, 218	20677.62,20675.57,23338.595,	0.121353	10.6387	3	0,	7	7	10	6	28		18	16	6	11	5	26	23	2	17	19
39S ribosomal protein L17, mitochondrial precursor,	MRPL17,	IPI00172591,	ENSP00000288937,	NP_071344,	Q9NRX2,	DSHLTLLNQLLQGLR, LFQVLAPR, NLLTGLVR	175	20050.01,	0.177143	10.6402	3	3735,5622,5739,5743,5840,6412,		3										3
39S ribosomal protein L28, mitochondrial precursor,Mitochondrial ribosomal protein L28,	MRPL28,	IPI00172594,IPI00719120,	ENSP00000199706,ENSP00000374326,	NP_006419,	Q13084,	EFYSEILDKK, IYVAELIQQLQQQALSEPAVVQK, LLEEKDPVPLFK	256, 287	30156.595,33751.58,	0.166288	8.74154	3	3735,5739,5761,6412,30529,45182,		2		3			2		2	2		4
Junctophilin-1,	JPH1,	IPI00173461,	ENSP00000344488,	NP_065698,	Q9HDC5,	ADAADQAALAAR, AKADAADQAALAAR, ELSPDFYQPGPDYVK	661	71685.5,	0.0438729	9.78422	3	3674,5792,7517,8150,8307,16020,16021,16529,30018,30314,	2		6							7					5
Isoform 1 of Protein-tyrosine phosphatase mitochondrial 1, mitochondrial precursor,	NDUFS3,PTPMT1,	IPI00174190,	ENSP00000325958,	NP_783859,	Q8WUK0-1,	IDPTVLLGALPLR, LSTVDMTGIPTLDNLQK	201	22843.38,	0.149254	10.2367	2	4725,5739,6470,8138,16020,16787,	7	6	2	5	5		5	5	5			6			2	5
60S ribosomal protein L10,Ribosomal protein L10,Uncharacterized protein ENSP00000369737,ribosomal protein L10,similar to ribosomal protein L10,	LOC284393,LOC285176,RPL10,	IPI00175098,IPI00374260,IPI00554723,IPI00646899,IPI00788119,IPI00853161,	ENSP00000341730,ENSP00000358825,ENSP00000358832,ENSP00000369737,	NP_006004,XP_209178,XP_209500,XP_942943,	P27635,	FNADEFEDMVAEK, VHIGQVIMSIR	235, 214, 214, 230, 138, 214	25210.62,24626.695,24603.705,26592.855,15774.355,24576.675,	0.119473	10.8958	2	3735,5622,5840,5842,6412,		4							2	3		3
Isoform 1 of Chaperone activity of bc1 complex-like, mitochondrial precursor,	CABC1,	IPI00176469,	ENSP00000355739,ENSP00000355741,	NP_064632,	Q8NI60-1,	ALQSTAVEQIGMFLGK, AVLGSSPFLSEANAER, DKLEYFEERPFAAASIGQVHLAR, EAGFPGQASSPLGR, FLTGYEVK, KAVLGSSPFLSEANAER, LANFGGLAVGLGFGALAEVAK, LANFGGLAVGLGFGALAEVAKK, LEYFEERPFAAASIGQVHLAR, LGQMLSIQDDAFINPHLAK, LTQAAVETHLQHLGIGGELIMAAR, LVPPPEETYSLHR, SFTDLYIQIIR, TLNNDLGPNWR, VALLDFGATR	647	71949.52,	0.290572	6.98109	15	166,5524,5739,6457,16301,16740,	127	191	92	100	135	104	148	124	213	126	139	124	164	94	110	133
ATP synthase epsilon chain, mitochondrial,OTTHUMP00000018178,	ATP5E,	IPI00176527,IPI00215878,	ENSP00000243997,ENSP00000325554,ENSP00000370414,	NP_001001977,NP_008817,	P56381,	DALKTEFK, QAGLSYIR	51, 51	5806.84,5779.72,	0.313725	10.6617	2	5739,5753,6811,15986,15992,16469,16787,45261,46872,46933,46961,								17							2	18
Isoform 1 of Polymerase I and transcript release factor,	PTRF,	IPI00176903,	ENSP00000349541,	NP_036364,	Q6NZI2-1,	IIGAVDQIQLTQAQLEER, KLEVNEAELLR, LEVNEAELLR, QAEMEGAVQSIQGELSK	390	43475.765,	0.117949	5.28467	4	3716,5515,5634,5737,5739,5783,5792,6350,6353,6355,6361,16020,16599,42134,	5	13	7	12	12	7	16	11	11	4	3	14	10	3	7	7
Isoform 2 of Bcl10-interacting CARD protein,	C9orf89,	IPI00177808,	ENSP00000364613,	NP_115686,	Q96LW7-2,	LVQDTPFLTGHGR, VLGFSPVIIDR	183	20625.33,	0.131148	8.21519	2	0,	3	5
Isoform SERCA2A of Sarcoplasmic/endoplasmic reticulum calcium ATPase 2,	ATP2A2,	IPI00177817,	ENSP00000311186,	NP_001672,	P16615-2,	AKDIVPGDIVEIAVGDK, AKDIVPGDIVEIAVGDKVPADIR, AMGVVVATGVNTEIGK, DIVPGDIVEIAVGDK, DIVPGDIVEIAVGDKVPADIR, EEMHLEDSANFIK, EFDELNPSAQR, EWGSGSDTLR, HTDPVPDPR, IGIFGQDEDVTSK, IRDEMVATEQER, ISLPVILMDETLK, IVEFLQSFDEITAMTGDGVNDAPALK, IVEFLQSFDEITAMTGDGVNDAPALKK, MNVFDTELK, NYLEPAILE, REEMHLEDSANFIK, RIGIFGQDEDVTSK, TGTLTTNQMSVCR, TVEEVLGHFGVNESTGLSLEQVK, TVEEVLGHFGVNESTGLSLEQVKK, VGEATETALTCLVEK, WGSNELPA…	997	109689.97,	0.231695	5.02043	23	0,	224	360	271	173	235	160	387	186	212	226	82	173	428	89	111	247
Gamma filamin variant,Isoform 1 of Filamin-C,Isoform 2 of Filamin-C,	FLNC,	IPI00178352,IPI00413958,IPI00783128,	ENSP00000327145,ENSP00000344002,ENSP00000373505,	NP_001449,	Q14315-1,Q14315-2,	AFGPGLEGGLVNK, LIALLEVLSQK, SPFEVQVSPEAGVQK, SPFVVNVAPPLDLSK	2727, 2694, 2705	291291.79,287550.665,288962.4,	0.0199365	5.87192	4	3779,5515,5737,15629,16020,					3			6	3	4		9	9
Isoform 1 of DnaJ homolog subfamily A member 3, mitochondrial precursor,Isoform 2 of DnaJ homolog subfamily A member 3, mitochondrial precursor,	DNAJA3,	IPI00179187,IPI00294610,	ENSP00000262375,ENSP00000347445,	NP_005138,	Q96EY1-1,Q96EY1-2,	FSQLAEAYEVLSDEVK, GGPTVDPEELFR, VMIPVPAGVEDGQTVR	453, 480	49660.23,52537.385,	0.0943984	9.73372	3	5083,5634,5739,5759,5829,6457,7264,8270,31072,42981,46872,51082,			2					2
12 kDa protein,16 kDa protein,17 kDa protein,18 kDa protein,19 kDa protein,21 kDa protein,25 kDa protein,30 kDa protein,39 kDa protein,44 kDa protein,CDNA FLJ32377 fis, clone SKMUS1000014, highly similar to Polyubiquitin 9,UBC protein,Ubiquitin,Ubiquitin C splice variant,ubiquitin B precursor,ubiquitin C,ubiquitin and ribosomal protein L40 precursor,ubiquitin and ribosomal protein S27a precursor,	RPS27A,UBA52,UBB,UBC,	IPI00179330,IPI00456429,IPI00719280,IPI00743241,IPI00743650,IPI00744274,IPI00783060,IPI00784990,IPI00789107,IPI00789823,IPI00790633,IPI00792712,IPI00793330,IPI00793729,IPI00793810,IPI00794211,IPI00794925,IPI00795527,IPI00796007,IPI00796600,IPI00797400,IPI00797482,IPI00798127,IPI00798155,	ENSP00000272317,ENSP00000304697,ENSP00000344818,ENSP00000352469,ENSP00000365975,ENSP00000365976,ENSP00000365977,	NP_001029102,NP_002945,NP_003324,NP_061828,NP_066289,XP_001132949,	P62979,P62987,P62988,	ESTLHLVLR, IQDKEGIPPDQQR, TITLEVEPSDTIENVK	156, 128, 229, 388, 388, 388, 76, 153, 265, 143, 218, 351, 109, 305, 170, 156, 189, 185, 151, 157, 167, 533, 685, 229	17964.795,14728.205,25761.46,43644.625,43676.685,43666.645,8564.785,17152.66,29794.97,16109.33,24542.945,39419.08,12252.03,34304.23,19145.005,17577.065,21209.31,20812.87,17044.46,17688.21,18777.6,59934.5,77028.04,25757.46,	0.200043	7.54059	3	5634,5737,6464,7049,7411,16567,30433,30528,42062,45941,48167,	42		31	14			19	22	14	14			19			27
Pentatricopeptide repeat domain 3,Uncharacterized protein PTCD3,	PTCD3,	IPI00181231,IPI00783302,	ENSP00000254630,ENSP00000374150,ENSP00000374151,	NP_060422,		AIGIEPSLATYHHIIR, VAVLQALASTVNR, VEGTDVTGIEEVVIPK	690, 689	78622.985,78548.86,	0.0652647	6.37668	3	5515,	3		4		2							2	2		4	2
NAD-dependent deacetylase sirtuin-3, mitochondrial precursor,	SIRT3,	IPI00183171,	ENSP00000270025,ENSP00000372191,	NP_036371,	Q9NTG7,	LSLQDVAELIR, LYTQNIDGLER, VVVMVGAGISTPSGIPDFR	399	43572.71,	0.102757	8.8606	3	3677,3950,5677,5739,6342,6355,6471,8270,16787,46872,	8	6	5	6	7		5	5	6	7		6	6	4	3	5
Isoform 1 of Voltage-dependent L-type calcium channel subunit beta-1,Isoform 2 of Voltage-dependent L-type calcium channel subunit beta-1,Isoform 3 of Voltage-dependent L-type calcium channel subunit beta-1,	CACNB1,	IPI00183965,IPI00219983,IPI00219984,	ENSP00000201943,ENSP00000345461,	NP_000714,NP_954855,NP_954856,	Q02641-1,Q02641-2,Q02641-3,	SSLAEVQSEIER, TLQLVALDADTINHPAQLSK, TNVGYNPSPGDEVPVQGVAITFEPK, TSLAPIIVYIK	599, 523, 478	65744.96,57863.01,53005.725,	0.1286	8.16991	4	5244,5245,5509,5624,5891,6811,6816,6936,16020,	3		2							3		3	4		3	2
38 kDa protein,39S ribosomal protein L45, mitochondrial precursor,similar to 39S ribosomal protein L45, mitochondrial precursor,	MRPL45,	IPI00185859,IPI00786965,IPI00790292,	ENSP00000308901,	NP_115727,XP_001126219,	Q9BRJ2,	LMYGQEDVPKDVLEYVVFEK, WSFVESLEPSHVVQVR	306, 135, 329	35350.675,15783.19,37727.46,	0.164579	9.12266	2	5739,5744,6886,15450,30529,			2
60S ribosomal protein L18,	RPL18,	IPI00215719,	ENSP00000084795,	NP_000970,	Q07020,	ILTFDQLALDSPK, TAVVVGTITDDVR, TNRPPLSLSR, TNSTFNQVVLK	188	21634.315,	0.25	12.2436	4	3723,3735,5622,5737,5840,5842,6412,	4	7	6	4	3	4	4	3	6	12		4		7	5	3
40S ribosomal protein S19,	RPS19,	IPI00215780,	ENSP00000221975,	NP_001013,	P39019,	ELAPYDENWFYTR, LKVPEWVDTVK, VLQALEGLK	145	16060.44,	0.227586	10.9886	3	3723,3735,5515,5622,5730,5840,5843,6412,9991,15669,30218,48856,51272,		4							2
Isoform 1 of Adenylate kinase isoenzyme 2, mitochondrial,Isoform 2 of Adenylate kinase isoenzyme 2, mitochondrial,	AK2,	IPI00215901,IPI00218988,	ENSP00000346921,ENSP00000362548,	NP_001616,NP_037543,	P54819-1,P54819-2,	AMVASGSELGK, APSVPAAEPEYPK, AVLLGPPGAGK, EKLDSVIEFSIPDSLLIR, GIHSAIDASQTPDVVFASILAAFSK, LDSVIEFSIPDSLLIR, LQAYHTQTTPLIEYYR, LVSDEMVVELIEK, NGFLLDGFPR, QAEMLDDLMEK, SYHEEFNPPKEPMKDDITGEPLIR	239, 232	26477.44,25614.305,	0.645578	8.02309	11	166,4017,5524,5739,5743,6139,16301,16740,19206,	23	27	18	15	21	12	20	16	25	35	13	30	15	13	20	18
ADP-ribosylation factor 1,ADP-ribosylation factor 3,	ARF1,ARF3,	IPI00215914,IPI00215917,	ENSP00000256682,ENSP00000272102,ENSP00000355714,	NP_001019397,NP_001019398,NP_001019399,NP_001649,NP_001650,	P61204,P84077,	DAVLLVFANK, ILMVGLDAAGK, MLAEDELRDAVLLVFANK, NISFTVWDVGGQDK, QDLPNAMNAAEITDK	181, 181	20696.62,20600.61,	0.320442	7.20038	5	166,3924,5515,5525,5622,5829,5886,6888,7264,12505,15031,16192,30017,		4				2			4	2		5	5
Carbonic anhydrase 1,	CA1,	IPI00215983,	ENSP00000256119,	NP_001729,	P00915,	ADGLAVIGVLMK, ESISVSSEQLAQFR, GGPFSDSYR, HDTSLKPISVSYNPATAK, LYPIANGNNQSPVDIK, SLLSNVEGDNAVPMQHNNRPTQPLK, VLDALQAIK, YSAELHVAHWNSAK	261	28870,	0.448276	7.1357	8	4089,5737,6730,8270,16829,46872,		2	13	6			3		5		5	6	11	18	14	3
Myosin light chain 1, skeletal muscle isoform,	MYL1,	IPI00216070,	ENSP00000307280,	NP_524144,	P05976,	ALGTNPTNAEVR, ALGTNPTNAEVRK, DQATYEDFVEGLR, EAFLLFDR, EGNGTVMGAELR, EQQDEFKEAFLLFDR, HVLATLGEK, IEFEQFLPMMQAISNNK, ITLSQVGDVLR, KIEFEQFLPMMQAISNNK, KIEFEQFLPMMQAISNNKDQATYEDFVEGLR, KVLGNPSNEELNAK, VFDKEGNGTVMGAELR, VLGNPSNEELNAK, VLGNPSNEELNAKK	194	21144.925,	0.556701	4.68454	15	3774,5509,5859,7517,8307,16459,	176	137	194	135	92	155	390	294	262	264	104	156	148	110	123	213
12 kDa protein,Cytochrome c oxidase subunit VIb isoform 1,	COX6B1,	IPI00216085,IPI00797738,	ENSP00000246554,	NP_001854,	P14854,	AEGTFPGKI, FPNQNQTR	86, 103	10192.345,12035.43,	0.181362	7.25474	2	4129,5739,6118,			52				36
Troponin I, fast skeletal muscle,Uncharacterized protein TNNI2,	TNNI2,	IPI00216236,IPI00657955,	ENSP00000252898,ENSP00000371330,ENSP00000371331,ENSP00000371336,	NP_003273,	P48788,	IDAAEEEKYDMEVR, SVMLQIAATELEK, SVMLQIAATELEKEESR, SVMLQIAATELEKEESRR	182, 182	21338.365,21354.515,	0.175824	9.51461	4	5524,15986,16469,46933,46961,												14
Thiosulfate sulfurtransferase,	TST,	IPI00216293,	ENSP00000249042,	NP_003303,	Q16762,	EGHPVTSEPSRPEPAVFK, FLGTEPEPDAVGLDSGHIR, GAVNMPFMDFLTEDGFEK, GAVNMPFMDFLTEDGFEKGPEELR, LGISNHTHVVVYDGEHLGSFYAPR, TYEQVLENLESK, TYEQVLENLESKR, VLDASWYSPGTR	297	33428.69,	0.37037	7.28332	8	4792,5739,5743,5759,8272,9440,16740,	9	16	13	20	20	9	16	10	15	15	4	12	12	14	19	11
Voltage-dependent anion-selective channel protein 1,	VDAC1,	IPI00216308,	ENSP00000265333,	NP_003365,	P21796,	DVFTKGYGFGLIK, GALVLGYEGWLAGYQMNFETAK, GYGFGLIK, KLETAVNLAWTAGNSNTR, LETAVNLAWTAGNSNTR, LGLGLEFQA, LTFDSSFSPNTGK, LTFDSSFSPNTGKK, LTLSALLDGK, LTLSALLDGKNVNAGGHK, SENGLEFTSSGSANTETTK, TDEFQLHTNVNDGTEFGGSIYQK, TKSENGLEFTSSGSANTETTK, VNNSSLIGLGYTQTLK, VNNSSLIGLGYTQTLKPGIK, VTGSLETK, VTQSNFAVGYK, WNTDNTLGTEITVEDQLAR, WTEYGLTFTEK, YQIDPDACFSAK	283	30772.39,	0.773852	8.88608	20	5515,5739,5741,6820,8308,8632,15283,15288,15482,16020,19867,46930,	586	698	395	310	650	406	572	443	585	543	341	615	524	360	371	519
Acylphosphatase, muscle type isozyme,Acylphosphatase-2,	ACYP2,	IPI00216461,IPI00784259,	ENSP00000306448,	NP_612457,	P14621,	GTVTGQVQGPEDK, LEYSNFSIR, SVDYEVFGR	99, 127	11139.52,13890.84,	0.278613	10.1849	3	3998,6796,16787,			14		7		8					5	18		5	5
Isoform 1 of Phosphatidylinositol-5-phosphate 4-kinase type-2 beta,Isoform 2 of Phosphatidylinositol-5-phosphate 4-kinase type-2 beta,	PIP4K2B,	IPI00216470,IPI00235352,	ENSP00000269554,ENSP00000311210,	NP_003550,	P78356-1,P78356-2,	FGIDDQDYQNSVTR, LTVDGVETYMVVTR	416, 281	47377.625,32316.98,	0.0834759	8.63791	2	5057,5737,5783,7166,16020,16301,16308,16740,46488,												2
40S ribosomal protein S8,Ribosomal protein S8,	RPS8,	IPI00216587,IPI00645201,	ENSP00000361283,ENSP00000361288,	NP_001003,	P62241,	IIDVVYNASNNELVR, ISSLLEEQFQQGK	208, 188	24205.015,21879.405,	0.141776	11.0019	2	5515,5622,5843,6412,30529,		2					2	2		2
Profilin-1,	PFN1,	IPI00216691,	ENSP00000225655,ENSP00000370747,	NP_005013,	P07737,	DSLLQDGEFSMDLR, TFVNITPAEVGVLVGK	140	15054.145,	0.214286	8.46487	2	1843,3785,5515,5634,5737,6357,7010,15629,30036,													5
Isoform Br21 of Ankyrin-1,Isoform Er1 of Ankyrin-1,Isoform Er10 of Ankyrin-1,Isoform Er11 of Ankyrin-1,Isoform Er12 of Ankyrin-1,Isoform Er13 of Ankyrin-1,Isoform Er14 of Ankyrin-1,Isoform Er15 of Ankyrin-1,Isoform Er16 of Ankyrin-1,Isoform Er2 of Ankyrin-1,Isoform Er3 of Ankyrin-1,Isoform Er4 of Ankyrin-1,Isoform Er5 of Ankyrin-1,Isoform Er6 of Ankyrin-1,Isoform Er7 of Ankyrin-1,Isoform Er8 of A…	ANK1,	IPI00216697,IPI00297532,IPI00374973,IPI00646300,IPI00654646,IPI00744408,IPI00744846,IPI00744895,IPI00744986,IPI00745348,IPI00747536,IPI00747552,IPI00748074,IPI00748330,IPI00748439,IPI00748895,IPI00749301,	ENSP00000265709,ENSP00000289734,ENSP00000339620,ENSP00000351681,	NP_000028,NP_065208,NP_065209,NP_065210,	P16157-1,P16157-10,P16157-11,P16157-12,P16157-13,P16157-14,P16157-15,P16157-16,P16157-2,P16157-21,P16157-3,P16157-4,P16157-5,P16157-6,P16157-7,P16157-8,P16157-9,	EGHVETVLALLEK, IIALGPTGAQFLSPVIVEIPHFASHGR, KGNTALHIAALAGQDEVVR, LALQAQPVPDELVTK, LLGNQATFSPIVTVEPR, LLLENNANPNLATTAGHTPLHIAAR, LSTPPPLAEEEGLASR, LVPLVQATFPENAVTK, TAAVLLQNDPNPDVLSK, TAEAVNFATLLYK	1881, 1719, 1856, 1519, 1880, 1834, 1644, 1718, 1806, 1694, 1905, 1672, 1858, 1897, 1821, 1983, 1743	206263.15,188997.73,203402.985,166478.57,206024.185,200913.245,180485.435,188758.765,197750.855,186137.565,208884.35,183647.825,203534.445,208237.58,200211.98,217477.4,191618.93,	0.099864	6.46921	10	5200,5737,5886,6887,7010,7165,8093,15629,16323,16529,19899,30507,45199,			9								3		21	3	11
Isoform 1 of Unc-112-related protein 2,Isoform 2 of Unc-112-related protein 2,	URP2,	IPI00216699,IPI00397834,	ENSP00000279227,ENSP00000339950,	NP_113659,NP_848537,	Q86UX7-1,Q86UX7-2,	VFVGEEDPEAESVTLR, YYSFFDLDPK	663, 667	75429.44,75952.08,	0.0390981	6.86853	2	5515,5737,5856,7155,16020,													2
Isoform 1 of Spectrin beta chain, erythrocyte,Isoform 2 of Spectrin beta chain, erythrocyte,spectrin beta isoform b,	SPTB,	IPI00216704,IPI00783228,IPI00847733,	ENSP00000334218,ENSP00000374370,ENSP00000374371,ENSP00000374372,ENSP00000374373,	NP_000338,NP_001020029,	P11277-1,P11277-2,	AQGLLSAGHPEGEQIIR, DGLAFNALIHK, ELHLLGVQVQQFQDVATR, FAALEKPTTLELK, FLDLLEPLGR, LLEVLSGEMLPKPTK, LLSGEDVGQDEGATR, LVAQDNFGYDLAAVEAAK, QLGIIPLLDPEDVFTENPDEK, TQLVDTADKFR	2328, 2137, 2137	267677.905,246319.88,246466.09,	0.0678171	4.95074	10	3779,5515,5624,5737,5856,5886,8091,43234,51015,51016,			2								2		15	2	10
Myosin regulatory light chain 2, ventricular/cardiac muscle isoform,	MYL2,	IPI00216798,	ENSP00000228841,	NP_000423,	P10916,	DGFIDKNDLR, DTFAALGR, EAFTIMDQNR, EAPGPINFTVFLTMFGEK, EEVDQMFAAFPPDVTGNLDYK, EMLTTQAER, FSKEEVDQMFAAFPPDVTGNLDYK, GADPEETILNAFK, LKGADPEETILNAFK, NEEIDEMIK, NEEIDEMIKEAPGPINFTVFLTMFGEK, NLVHIITHGEEK, NLVHIITHGEEKD, VNVKNEEIDEMIK	166	18789.175,	0.722892	4.62758	14	3774,5509,5515,5856,6942,8307,16459,	316	326	342	157	222	293	439	395	367	418	147	150	186	246	220	291
Carbonic anhydrase 3,	CA3,	IPI00216983,	ENSP00000285381,	NP_005172,	P07451,	DGIAVIGIFLK, HDPSLQPWSVSYDGGSAK, IGHENGEFQIFLDALDK, SLLSSAENEPPVPLVSNWRPPQPINNR, VVFDDTYDR, YAAELHLVHWNPK	260	29557.215,	0.365385	7.37459	6	4089,5737,6730,8270,16151,16829,46872,	7	13	9		4	7	4		9	10		7	7	2	3	7
Isoform 1 of Succinyl-CoA ligase [ADP-forming] beta-chain, mitochondrial precursor,Isoform 2 of Succinyl-CoA ligase [ADP-forming] beta-chain, mitochondrial precursor,	SUCLA2,	IPI00217232,IPI00464979,	ENSP00000367912,ENSP00000367923,	NP_003841,	Q9P2R7-1,Q9P2R7-2,	DLEIKIPVVVR, EPIDIEEGIKK, EQALQLAQK, EYYFAITMER, IFDLQDWTQEDER, IFDLQDWTQEDERDKDAAK, ILACDDLDEAAR, INFDSNSAYR, IVFSPEEAK, KIFDLQDWTQEDER, LHGGTPANFLDVGGGATVHQVTEAFK, LSEIVTLAK, LYSLFLK, MGFPPNIVESAAENMVK, REYYFAITMER, SFQGPVLIGSSHGGVNIEDVAAESPEAIIK, SPDEAYAIAK, VLAILVNIFGGIMR	441, 463	48039.35,50316.88,	0.456022	7.29314	18	4775,5515,5524,5739,6099,6781,8152,16874,	39	54	57	42	55	22	53	39	43	25	36	43	43	41	60	44
Myoglobin,	MB,	IPI00217493,	ENSP00000352835,	NP_005359,NP_976311,NP_976312,	P02144,	GHHEAEIKPLAQSHATK, GLSDGEWQLVLNVWGK, HGATVLTALGGILK, HGATVLTALGGILKK, HPGDFGADAQGAMNK, KGHHEAEIKPLAQSHATK, KHGATVLTALGGILK, PLAQSHATK, VEADIPGHGQEVLIR	154	17183.725,	0.519481	7.86325	9	1666,5344,5506,6810,15671,19825,20037,43353,46872,	133	172	125	84	89	81	49	40	150	188	39	110	81	70	99	120
1-acyl-sn-glycerol-3-phosphate acyltransferase gamma,Isoform 2 of 1-acyl-sn-glycerol-3-phosphate acyltransferase gamma,Isoform 3 of 1-acyl-sn-glycerol-3-phosphate acyltransferase gamma,	AGPAT3,	IPI00217814,IPI00445527,IPI00749011,	ENSP00000291572,ENSP00000332989,	NP_001032642,NP_064517,	Q9NRZ7-1,Q9NRZ7-2,Q9NRZ7-3,	DALQEIYNQK, FPLEDIPLDEK, GNKNPSLLGILYGK, NPSLLGILYGK, RFPLEDIPLDEK	314, 396, 463	36270.975,45513.665,52201.71,	0.0944375	8.65277	5	3841,5783,5886,8152,8415,8654,16021,16740,	2	7
Aldehyde dehydrogenase 4 family, member A1,Delta-1-pyrroline-5-carboxylate dehydrogenase, mitochondrial precursor,	ALDH4A1,	IPI00217871,IPI00647328,	ENSP00000290597,ENSP00000364484,ENSP00000364490,	NP_003739,NP_733844,	P30038,	AADMLSGPR, AIEAALAAR, ASGTNDKPGGPHYILR, DPQEPIMKEEIFGPVLSVYVYPDDK, DPQEPIMKEEIFGPVLSVYVYPDDKYK, EEIFGPVLSVYVYPDDK, ETHKPLGDWSYAYMQ, ETLQLVDSTTSYGLTGAVFSQDKDVVQEATK, IKVGDPAEDFGTFFSAVIDAK, KEWDLKPIADR, LYVPHSLWPQIK, NAAGNFYINDK, PGGPHYILR, PSDTAMLASYAVYR, SADVESVVSGTLR, SSPSLTILAGGK, STGSIVGQQPFGGAR, VANEPVLAFTQGSPER, VGDPAEDFGTFFSAVIDAK, WTSPQVIK, YAVELEGQQPISVPPSTNSTVYR, YKETLQLVDSTTSYGLTGAVFSQD…	563, 547	61718.93,59874.81,	0.473972	8.0151	22	5739,5759,6561,6562,8152,9055,16491,	20	61	76	43	66	30	52	41	32	30	25	39	47	27	61	44
Keratin, type I cytoskeletal 16,	KRT16,	IPI00217963,	ENSP00000301653,	NP_005548,	P08779,	ALEEANADLEVK, APSTYGGGLSVSSR, ASLENSLEETK, ASLENSLEETKGR, DAETWFLSK, EVASNSELVQSSR, GQTGGDVNVEMDAAPGVDLSR, IIAATIENAQPILQIDNAR, KNHEEEMLALR, LEQEIATYR, LLEGEDAHLSSQQASGQSYSSR, NKIIAATIENAQPILQIDNAR, QTVEADVNGLR, RVLDELTLAR, TDLEMQIEGLK, TDLEMQIEGLKEELAYLR, TDLEMQIEGLKEELAYLRK, TEELNKEVASNSELVQSSR, TKYEHELALR, TRLEQEIATYR, TRLEQEIATYRR, VLDELTLAR, VLQGLEIELQSQLSMK, YEHELALR	473	51267.39,	0.463002	4.69092	24	5200,5515,5882,7010,8283,8544,45104,	12	7	5	1	22	46	45	125	62	3	51	45	163	9	27	229
Isoform 1 of L-lactate dehydrogenase A chain,	LDHA,	IPI00217966,	ENSP00000227157,	NP_005557,	P00338-1,	DLADELALVDVIEDK, DQLIYNLLK, DQLIYNLLKEEQTPQNK, LLIVSNPVDILTYVAWK, LVIITAGAR, QVVESAYEVIK, VTLTSEEEAR	332	36688.465,	0.237952	8.45178	7	4459,5515,5737,5829,6100,16491,19642,	3	4	2							4	3	21	7		11	5
Isoform 1 of Probable D-lactate dehydrogenase, mitochondrial precursor,Isoform 2 of Probable D-lactate dehydrogenase, mitochondrial precursor,	LDHD,	IPI00218015,IPI00329133,	ENSP00000300051,ENSP00000334069,	NP_705690,NP_919417,	Q86WU2-1,Q86WU2-2,	AVLDPQGLMNPGK, AVVGGSHVSTAAVVR, DNVLNLEVVLPDGR, ILELNQEDFSVVVEPGVTR	484, 507	52144.085,54870.18,	0.123174	6.54795	4	4458,5515,5739,6118,16491,							3	4
Glycogen phosphorylase, muscle form,Uncharacterized protein PYGM,	PYGM,	IPI00218130,IPI00657751,	ENSP00000164139,ENSP00000366650,ENSP00000366663,	NP_005600,	P11217,	APNDFNLKDFNVGGYIQAVLDR, APNDFNLKDFNVGGYIQAVLDRNLAENISR, DFNVGGYIQAVLDR, GLAGVENVTELKK, IGEDFISDLDQLR, IGEDFISDLDQLRK, LKQEYFVVAATLQDIIRR, LLSFVDDEAFIR, LVTAIGDVVNHDPAVGDR, QVIEQLSSGFFSPK, VAIQLNDTHPSLAIPELMR, VHINPNSLFDIQVK, VIFLENYR, VIPAADLSEQISTAGTEASGTGNMK	842, 754	97091.265,87316.355,	0.232537	7.83182	14	4645,5515,5975,5980,8184,16757,30170,	2	3	6	2	2			4	6	9		8			10	5
Carbonic anhydrase 2,	CA2,	IPI00218414,	ENSP00000285379,	NP_000058,	P00918,	AVQQPDGLAVLGIFLK, SADFTNFDPR, VVDVLDSIK	260	29245.895,	0.134615	7.4657	3	2009,4089,5737,6730,8270,15670,16829,46872,46903,														3
Mitochondrial import inner membrane translocase subunit Tim16,	Magmas,	IPI00218463,	ENSP00000315693,	NP_057153,	Q9Y3D7,	SAAASNLSGLSLQEAQQILNVSK, YLAQIIVMGVQVVGR	125	13824.63,	0.304	10.2921	2	5739,6605,15031,16020,		7							5			9	7
Beta-enolase,	ENO3,	IPI00218474,	ENSP00000324105,ENSP00000370739,	NP_001967,NP_443739,	P13929,	AAVPSGASTGIYEALELR, AVENINNTLGPALLQK, DATNVGDEGGFAPNILENNEALELLK, FMIELDGTENK, FRAAVPSGASTGIYEALELR, GNPTVEVDLHTAK, HIADLAGNPDLILPVPAFNVINGGSHAGNK, IGAEVYHHLK, LAMQEFMILPVGASSFK, TAIQAAGYPDK, TAIQAAGYPDKVVIGMDVAASEFYR, VDKFMIELDGTENK, VVIGMDVAASEFYR, YGKDATNVGDEGGFAPNILENNEALELLK	434	46986.485,	0.400922	7.83623	14	15,287,4634,5737,6096,16829,	24	35	17	16	17	27	30	25	38	16	18	20	18	27	10	32
Gamma-sarcoglycan,	SGCG,	IPI00218559,	ENSP00000218867,	NP_000222,	Q13326,	LEGESEFLFPLYAK, MVEVQNQQFQINSNDGKPLFTVDEK, VTGPEGALFEHSVETPLVR	291	32352.1,	0.199313	5.85557	3	5515,5737,5856,5886,7010,7517,16012,16021,	3	7	5	5	4	3	10	8	4	3		9	4	4	3	10
Phosphoglycerate mutase 2,	PGAM2,	IPI00218570,IPI00844133,	ENSP00000297283,	NP_000281,	P15259,	ALPFWNEEIVPQIK, HLEGMSDQAIMELNLPTGIPIVYELNK	253, 252	28765.96,28219.305,	0.162377	9.67113	2	3824,6096,6941,8152,16853,16868,42803,																2
Superoxide dismutase,Uncharacterized protein SOD1,	SOD1,	IPI00218733,IPI00783680,	ENSP00000270142,ENSP00000374644,ENSP00000374645,	NP_000445,	P00441,	GDGPVQGIINFEQK, HVGDLGNVTADK	156, 154	16121.925,15935.685,	0.167749	6.18297	2	4785,5507,5737,6801,6979,7399,8270,16209,16491,46872,		12	4					8				7				8
ATP synthase, H+ transporting, mitochondrial F0 complex, subunit E,	ATP5I,	IPI00218848,	ENSP00000306003,ENSP00000372487,	NP_009031,	P56385,	ELAEDDSILK, MVPPVQVSPLIK, YNYLKPR, YSALFLGVAYGATR	72	8307.565,	0.597222	9.79536	4	5739,6811,15986,15992,16469,45263,46872,46933,46961,	47	34	46	42	61	15	66	61	54	33	10	47	70	24	37	61
65 kDa protein,67 kDa protein,[Pyruvate dehydrogenase [lipoamide]]-phosphatase 1, mitochondrial precursor,	PPM2C,	IPI00218971,IPI00788806,IPI00790255,IPI00794806,	ENSP00000297598,	NP_060914,	Q9P0J1,	HAVGNNEFGTVDHER, LLGLLMPFR, NVSSILGFDSNQLPANAPIEDRR	537, 562, 573, 588	61053.62,63694.735,64943.16,66672.315,	0.0832774	6.83794	3	3824,5739,6470,8287,15071,	2		3	4	3			3	3			4		2		2
32 kDa protein,Glyceraldehyde-3-phosphate dehydrogenase,	GAPDH,	IPI00219018,IPI00795257,	ENSP00000229239,	NP_002037,	P04406,	GALQNIIPASTGAAK, LISWYDNEFGYSNR, LVINGNPITIFQER, LVINGNPITIFQERDPSK, RVIISAPSADAPMFVMGVNHEK, VIHDNFGIVEGLMTTVHAITATQK, VIISAPSADAPMFVMGVNHEK, VVDLMAHMASKE	335, 293	36053,31547.76,	0.335897	8.22158	8	4365,5515,5737,6006,6096,16491,51287,	8	25	19	11	9	3	9	6	28	23	7	32	21	8	36	25
NADH dehydrogenase [ubiquinone] 1 alpha subcomplex subunit 8,	NDUFA8,	IPI00219034,	ENSP00000362873,	NP_055037,	P51970,	FYFWTK, LGWVRPDLGELSK, PGIVELPTLEELK, PGIVELPTLEELKVDEVK, PRPDPSPEIEGDLQPATHGSR, TDRPLPENPYHSR, VKTDRPLPENPYHSR	172	20104.875,	0.424419	7.73711	7	3954,5739,5743,5747,6120,8137,16491,	182	225	200	200	229	115	167	169	228	157	95	133	167	73	156	143
60S ribosomal protein L27,	RPL27,	IPI00219155,IPI00382885,	ENSP00000253788,	NP_000979,	P61353,	NIDDGTSDRPYSHALVAGIDR, VYNYNHLMPTR, YSVDIPLDK	136, 140	15797.625,16415.245,	0.297164	11.1608	3	3735,5622,5840,6412,	2	5				3	2		4	5						4
Isoform 3 of Reticulon-4,	RTN4,	IPI00219207,		NP_008939,	Q9NQC3-3,	AYLESEVAISEELVQK, DKVVDLLYWR, LFLVDDLVDSLK, SDEGHPFR, VVDLLYWR	199	22395.2,	0.231156	9.78391	5	0,	19	23	17			7	18	7	19	22	5	27	18		12	11
L-lactate dehydrogenase B chain,	LDHB,	IPI00219217,	ENSP00000229319,	NP_002291,	P07195,	LIAPVAEEEATVPNNK, MVVESAYEVIK, SLADELALVDVLEDK	334	36638.225,	0.125749	5.92622	3	4459,5737,6100,16491,19642,		2	2	3	3	2	3
Galectin-7,	LGALS7,LOC653499,LOC728910,LOC732032,	IPI00219221,	ENSP00000313571,ENSP00000367891,	NP_001035972,NP_002298,XP_001128786,XP_001133982,	P47929,	GQPFEVLIIASDDGFK, LDTSEVVFNSK, LVEVGGDVQLDSVR	136	15074.965,	0.301471	7.78207	3	5529,5615,5737,6915,7157,		7														2
ATP synthase, H+ transporting, mitochondrial F0 complex, subunit F2 isoform 2c,ATP synthase, H+ transporting, mitochondrial F0 complex, subunit F2 isoform 2d,Isoform 1 of ATP synthase f chain, mitochondrial,Isoform 2 of ATP synthase f chain, mitochondrial,	ATP5J2,	IPI00219291,IPI00220300,IPI00456013,IPI00719814,	ENSP00000292475,ENSP00000352890,	NP_001003713,NP_001003714,NP_001034267,NP_004880,	P56134-1,P56134-2,	DFSPSGIFGAFQR, LGELPSWILMR	88, 94, 55, 49	10363.165,10917.775,6295.34,5740.73,	0.363552	10.0181	2	5739,5753,6754,6811,15078,15992,45263,46872,	55	48	53	68	94	30	76	60	52	37	28	75	74	44	56	47
Moesin,	MSN,	IPI00219365,	ENSP00000353408,	NP_002435,	P26038,	FYPEDVSEELIQDITQR, IAQDLEMYGVNYFSIK	577	67819.6,	0.0571924	6.31774	2	1931,5102,5200,5737,5856,5886,6928,8092,16323,16324,19898,	2	2
NADH dehydrogenase [ubiquinone] 1 alpha subcomplex subunit 2,	NDUFA2,	IPI00219381,	ENSP00000252102,	NP_002479,	O43678,	ALENVLSGK, ALENVLSGKA, ANPDLPILIR, KANPDLPILIR, YAFGQETNVPLNNFSADQVTR	99	10921.45,	0.424242	10.1138	5	3954,5739,5747,6091,6120,8137,16020,16491,31966,	11	14	66	44	61	10	47	44	25	7	7	46	41	17	57	40
NADH dehydrogenase [ubiquinone] 1 beta subcomplex subunit 3,	NDUFB3,	IPI00219383,	ENSP00000237889,	NP_002482,	O43676,	IEGTPLETIQK, IEGTPLETIQKK, MELPDYR, SVSFSDVFFK	98	11401.945,	0.295918	9.73203	4	3954,5739,5747,6120,8137,16020,16491,	13	18	25	32	22	14	36	19	21	14	8	19	19	13	23	13
NADH dehydrogenase [ubiquinone] 1 beta subcomplex subunit 6,	NDUFB6,	IPI00219385,	ENSP00000369176,	NP_002484,	O95139,	EPVLPPQK, IFPGDTILETGEVIPPMK, IFPGDTILETGEVIPPMKEFPDQHH, WLKDQELSPR, YHVSEKPYGIVEK	128	15489.145,	0.4375	10.1805	5	3954,5739,5747,6120,8137,16020,16491,31966,	59	85	68	42	86	36	68	62	92	63	27	49	54	24	65	65
22 kDa protein,Phosphatidylethanolamine-binding protein 1,	PEBP1,	IPI00219446,IPI00795288,	ENSP00000261313,	NP_002558,	P30086,	GNDISSGTVLSDYVGSGPPK, LYTLVLTDPDAPSR	187, 196	21056.65,21744.575,	0.177644	7.99201	2	166,4867,5515,5524,5737,8289,8429,	2	2	2	2	2		2	3				2	2	2		2
CDNA FLJ44241 fis, clone THYMU3008436, highly similar to 6- phosphofructokinase, muscle type,Isoform 1 of 6-phosphofructokinase, muscle type,Isoform 2 of 6-phosphofructokinase, muscle type,	PFKM,	IPI00219585,IPI00465179,IPI00743142,	ENSP00000345771,ENSP00000352842,	NP_000280,	P08237-1,P08237-2,	DLQANVEHLVQK, IMEIVDAITTTAQSHQR	749, 851, 780	81774.96,93253.25,85181.925,	0.0366584	7.92964	2	166,287,3872,5524,5737,5945,5977,6110,8022,16301,16740,															2
Glutathione S-transferase kappa 1,	GSTK1,	IPI00219673,	ENSP00000351181,	NP_057001,	Q9Y2Q3,	AGMSAEQAQGLLEK, DFLSVMLEK, DSGNKPPGLLPR, FLTAVNLEHPEMLEK, HHLQIPIHFPK, MELLAHLLGEK, NEDITEPQSILAAAEK, WMGPIPPAVNAR, YGAFGLPITVAHVDGQTHMLFGSDR, YQNIWNINLQLRPSLITGIMK	226	25496.625,	0.646018	8.68559	10	4364,5515,5622,5777,15035,16740,30288,	26	29	26	21	30	11	24	13	32	24	6	23	13	14	26	18
Erythrocyte band 7 integral membrane protein,	STOM,	IPI00219682,	ENSP00000286713,	NP_004090,	P27105,	EASMVITESPAALQLR, NSTIVFPLPIDMLQGIIGAK, TISFDIPPQEILTK, VIAAEGEMNASR, VQNATLAVANITNADSATR, YLQTLTTIAAEK	288	31730.415,	0.322917	8.06993	6	5856,5887,16020,45121,51260,	5	2	10			2	3	2	6	5	12	4	27	5	16	3
cell death-regulatory protein GRIM19,	NDUFA13,	IPI00219685,	ENSP00000252576,	NP_057049,	Q9P0J0,	ENLEEEAIIMK, IALLPLLQAETDR, IALLPLLQAETDRR, LQIEDFEAR, QDMPPPGGYGPIDYK, TTEEALHASHGFMWYT, VGESVFHTTR, VKQDMPPPGGYGPIDYK, WVPPLIGELYGLR	227	25820.59,	0.396476	10.2573	9	3954,5515,5524,5634,5654,5737,5739,5747,6606,6800,6915,8137,8624,16020,16021,16491,17148,30262,30308,45892,	168	135	112	122	126	41	87	78	111	172	37	102	87	81	110	87
Mitochondrial 2-oxoglutarate/malate carrier protein,	SLC25A11,	IPI00219729,	ENSP00000225665,ENSP00000370760,	NP_003553,	Q02978,	AVIGMTAGATGAFVGTPAEVALIR, AVVVNAAQLASYSQSK, EEGVLTLWR, FLFGGLAGMGATVFVQPLDLVK, GIYTGLSAGLLR, ITREEGVLTLWR, LGIYTVLFER, LGPHTVLTFIFLEQMNK, LTGADGTPPGFLLK, MIDGKPEYK, NGLDVLFK, NVFNALIR, TSFHALTSILK, YEGFFSLWK	314	34061.405,	0.547771	10.4042	14	5215,5488,5739,5743,5887,6810,15367,16020,	305	266	224	199	296	125	205	142	314	270	145	272	202	117	191	145
NADH dehydrogenase [ubiquinone] 1 beta subcomplex subunit 7,	NDUFB7,	IPI00219772,	ENSP00000215565,	NP_004137,	P17568,	EMVATQQEMMDAQLR, EREMVATQQEMMDAQLR, GQGPGEVDPK, RYLGDASVEPDPLQMPTFPPDYGFPER, RYLGDASVEPDPLQMPTFPPDYGFPERK, YLGDASVEPDPLQMPTFPPDYGFPER, YLGDASVEPDPLQMPTFPPDYGFPERK	137	16401.82,	0.40146	9.21137	7	3954,5739,5743,5747,6120,8137,16020,16491,	83	101	48	50	94	64	84	77	78	76	43	79	117	30	49	53
Troponin C, skeletal muscle,	TNNC2,	IPI00219796,	ENSP00000361636,	NP_003270,	P02585,	AAFDMFDADGGGDISVK, ASGEHVTDEEIESLMK, IDFDEFLK, NADGYIDPEELAEIFR, SYLSEEMIAEFK	160	18121.895,	0.43125	3.81186	5	5509,5861,6937,	3	22			9		4		11	4		57	12
Isoform 1 of Low molecular weight phosphotyrosine protein phosphatase,	ACP1,	IPI00219861,	ENSP00000272065,ENSP00000371762,	NP_004291,	P24666-1,	IELLGSYDPQK, VDSAATSGYEIGNPPDYR	158	18042.315,	0.183544	6.73073	2	3993,4726,5625,5737,6470,16787,42802,		2			2		2	3		2			2			2
Chromosome 20 open reading frame 44,Isoform 1 of Ubiquinol-cytochrome c reductase complex chaperone CBP3 homolog,Isoform 2 of Ubiquinol-cytochrome c reductase complex chaperone CBP3 homolog,	UQCC,	IPI00219889,IPI00513896,IPI00514207,IPI00844050,	ENSP00000363502,ENSP00000363505,ENSP00000363506,ENSP00000363515,	NP_060714,	Q9NVA1-1,Q9NVA1-2,	HLELLVEYVR, IIEAMGFTGPLK, NPQSILKPHSPTYNDEGL, TDFEEFFLR	273, 267, 313, 299	31517.29,30930.79,36248.72,34571.88,	0.170859	8.90507	4	31410,	8	7			2	2		2	8	4	2	7		5	4
Flavin reductase,Uncharacterized protein BLVRB,	BLVRB,	IPI00219910,IPI00783862,	ENSP00000263368,ENSP00000373546,ENSP00000373547,	NP_000704,	P30043,	TVAGQDAVIVLLGTR, YVAVMPPHIGDQPLTGAYTVTLDGR	211, 206	22593.76,22119.215,	0.191874	7.72717	2	4074,5737,16491,42602,44237,50662,													2
isopentenyl-diphosphate delta isomerase,	IDI1,	IPI00220014,	ENSP00000370748,	NP_004499,	Q13907,	AELGIPLEEVPPEEINYLTR, AFSVFLFNTENK	284	32485.165,	0.112676	7.97375	2	287,4452,5777,6695,8299,16117,16787,16853,	2
NADH dehydrogenase [ubiquinone] iron-sulfur protein 5,	NDUFS5,	IPI00220063,	ENSP00000362058,ENSP00000362060,	NP_004543,	O43920,	FGLNIDR, PFLDIQK, PFLDIQKR, WLTIQSGEQPYK	106	12517.415,	0.254717	9.53822	4	3954,5739,5747,6120,8137,16020,16491,32981,	6	18	8	22	22	12	9	13	17	7	2	13	6	6	9	9
Isocitrate dehydrogenase [NAD] subunit gamma, mitochondrial precursor,	IDH3G,	IPI00220150,	ENSP00000217901,	NP_004126,	P51553,	AVLASMDNENMHTPDIGGQGTTSEAIQDVIR, ENTEGEYSSLEHESVAGVVESLK, GNIETNHNLPPSHK, HKDIDILIVR, HTVTMIPGDGIGPELMLHVK	393	42793.97,	0.249364	8.6559	5	166,287,4449,5524,5739,5975,6099,8152,16491,16616,30145,	5	4	3			2	6	6	7	5			5		5	4
Keratin, type II cytoskeletal 1,	KRT1,	IPI00220327,	ENSP00000252244,	NP_006112,	P04264,	AEAESLYQSK, AEAESLYQSKYEELQITAGR, DVDGAYMTK, DYQELMNTK, FLEQQNQVLQTKWELLQQVDTSTR, FVSTTYSGVTR, GGGGGGYGSGGSSYGSGGGSYGSGGGGGGGR, GSGGGSSGGSIGGR, GSYGSGGSSYGSGGGSYGSGGGGGGHGSYGSGSSSGGYR, KQISNLQQSISDAEQR, LALDLEIATYR, LLRDYQELMNTK, LNDLEDALQQAK, LNDLEDALQQAKEDLAR, LRSEIDNVKK, NKLNDLEDALQQAK, NKLNDLEDALQQAKEDLAR, NMQDMVEDYR, NSKIEISELNR, QISNLQQSISDAEQR, QISNLQQSISDAEQRGENALK, SGGGFSSGSAGIINYQR, SIS…	644	66017.445,	0.531056	8.33707	36	1867,4872,5200,5515,5529,5856,5882,6979,8544,16020,42730,45765,	476	984	280	494	486	764	698	1145	1186	496	471	578	1076	153	315	1152
10 kDa heat shock protein, mitochondrial,	HSPE1,	IPI00220362,	ENSP00000233893,	NP_002148,	P61604,	GGEIQPVSVK, GGIMLPEK, GKGGEIQPVSVK, KFLPLFDR, VLLPEYGGTK, VLQATVVAVGSGSK, VVLDDKDYFLFR	102	10931.645,	0.627451	9.49218	7	5524,5739,6457,6919,6986,51082,51087,	10	31	45	46	80	10	70	92	35	13	10	81	80	25	57	60
565 kDa protein,Isoform 1 of Ryanodine receptor 1,Isoform 2 of Ryanodine receptor 1,Isoform 3 of Ryanodine receptor 1,	RYR1,	IPI00220391,IPI00220558,IPI00334799,IPI00477796,IPI00783826,	ENSP00000347667,ENSP00000352608,ENSP00000354254,ENSP00000373884,ENSP00000373886,	NP_000531,NP_001036188,	P21817-1,P21817-2,P21817-3,	AAASLDTATFSTTEMALALNR, AGGGIGDEIEDPAGDEYELYR, AIMVDSMLHTVYR, AQWLTEPNPSAEELFR, ARPELLQSHFIPTIGR, ASMVLFLDR, DIVGSEAFQDYVTDPR, DLYALYPLLIR, DMVVMLLSLLEGNVVNGMIAR, DPVGGSVEFQFVPVLK, EAATAVAALLWAAVTR, ESNTFFQVEPNTK, FAVFVNGESVEENANVVVR, FLNYLSR, GEGGSGLLAAIEEAIR, HVTTGQYLALTEDQGLVVVDASK, IIVNNLGIDEASWMK, IYFEISETNR, KPDPLHQLVLHFSR, LAENIHELWALTR, LAQDSSQIELLK, LAVFAQPIVSR, LFPAVFVLPTHQNVIQFELGK, LGI…	5040, 5035, 5033, 5034, 5038	565378.935,564894.43,564545.03,564654.115,565170.715,	0.147141	4.96394	53	4872,5216,5219,5245,5509,5515,5624,5790,5887,6811,6816,6874,6936,15278,16020,16529,30314,30315,	45	90	66	40	32	19	102	32	58	94	15	166	136	21	92	74
Ubiquinol-cytochrome c reductase complex 14 kDa protein,	UQCRB,	IPI00220416,	ENSP00000287022,	NP_006285,	P14927,	DDTIYEDEDVK, DDTIYEDEDVKEAIR, LGLMRDDTIYEDEDVK, LGLMRDDTIYEDEDVKEAIR, LPENLYNDR, RLPENLYNDR, WYYNAAGFNK, YEEENFYLEPYLK	111	13530.34,	0.477477	9.23487	8	5739,5746,6119,6122,6810,8121,9060,16020,16491,	46	73	44	66	79	41	52	54	89	34	25	64	50	36	35	53
Isoform 1 of ATP synthase D chain, mitochondrial,	ATP5H,	IPI00220487,	ENSP00000301587,	NP_006347,	O75947-1,	AGLVDDFEK, AGLVDDFEKK, IVEYEKEMEK, KYPYWPHQPIENL, LAALPENPPAIDWAYYK, NLIPFDQMTIEDLNEAFPETK, SWNETLTSR, TIDWVAFAEIIPQNQK, VPVPEDKYTAQVDAEEK, VPVPEDKYTAQVDAEEKEDVK, YPYWPHQPIENL, YTAQVDAEEK, YTAQVDAEEKEDVK	161	18491.03,	0.726708	4.93985	13	5739,6811,15986,15992,16469,45263,46933,46961,	247	210	163	129	204	91	172	156	245	192	82	173	137	80	152	153
Isoform M1 of Pyruvate kinase isozymes M1/M2,Isoform M2 of Pyruvate kinase isozymes M1/M2,	PKM2,	IPI00220644,IPI00479186,	ENSP00000373740,ENSP00000373741,ENSP00000373742,ENSP00000373743,ENSP00000373744,ENSP00000373745,	NP_002645,NP_872270,NP_872271,	P14618-1,P14618-2,	FGVEQDVDMVFASFIR, GADFLVTEVENGGSLGSK, GVNLPGAAVDLPAVSEK, IYVDDGLISLQVK, KGVNLPGAAVDLPAVSEKDIQDLK, LDIDSPPITAR, LNFSHGTHEYHAETIK, TATESFASDPILYRPVAVALDTK	531, 531	58061.57,57936.38,	0.227872	7.85879	8	287,4743,5515,5737,5739,5829,6096,16740,30955,		3	3		5		2		5	2		6			6	3
43 kDa protein,acyl-Coenzyme A thioesterase 2, mitochondrial isoform a,acyl-Coenzyme A thioesterase 2, mitochondrial isoform b,	ACOT9,	IPI00220710,IPI00646015,IPI00748985,	ENSP00000309735,ENSP00000336580,ENSP00000368594,ENSP00000368597,ENSP00000368605,	NP_001028755,NP_001032248,	Q9Y305,	DSYIEVLLPLGSEPELR, HFNSMSGPATLR, IAFSSTSLLK, MSPLSIVTALVDK, TYGESMLYLDGQR, YLTVQNTVR	439, 448, 379	49901.32,50850.365,43206.55,	0.176331	8.21046	6	3986,5515,5739,6637,16787,		6	3	2	2		3			2		2
Spectrin, alpha, erythrocytic 1,Uncharacterized protein SPTA1,	SPTA1,	IPI00220741,IPI00641363,	ENSP00000295798,ENSP00000357129,ENSP00000357130,	NP_003117,	P02549,	DLQGVQNLLK, EKEPIVDNTNYGADEEAAGALLK, SSDEIENAFQALAEGK, VADDLLFEGLLTPEGAQIR	2431, 2416	281209.75,279671.665,	0.0280589	4.69476	4	5509,5515,5624,5737,5856,7015,8091,8360,16020,51015,51016,				2									6
Isoform 1 of Acyl-coenzyme A thioesterase 2, mitochondrial precursor,	ACOT2,	IPI00220906,	ENSP00000238651,	NP_006812,	P49753-1,	ADTLGELDLER, AESTFLFLVGQDDHNWK, AHAMAQVDAWK, APALGGSFAGLEPMGLLWALEPEKPLVR, ASLHALVGSPIIWGGEPR, DGYADIVDVLNSPLEGPDQK, GALFQAHAR, GLAPEQPVTLR, GPGVGLLGISK, TMETLHLEYFEEAMNYLLSHPEVK, TPLAVELEVLDGHDPDPGR, YFLPPGVR, YKGETLPPVGVNR, YRADTLGELDLER	483	53256.1,	0.41822	8.93436	14	38,1676,5515,5739,6629,6637,16290,16787,	28	63	42	31	47	26	32	19	60	36	28	26	50	36	46	14
18 kDa protein,Peroxisomal membrane protein 2,	PXMP2,	IPI00221002,IPI00797733,	ENSP00000321271,	NP_061133,	Q9NR77,	AATSGILSALGNFLAQMIEK, ALAQYLLFLR	195, 160	22252.27,17554.805,	0.170673	9.93314	2	5777,16020,16021,		2
40S ribosomal protein S9,	RPS9,	IPI00221088,	ENSP00000302896,	NP_001004,	P46781,	LDYILGLK, LFEGNALLR, LIGEYGLR, QVVNIPSFIVR	194	22591.235,	0.185567	11.317	4	3735,5515,5622,5843,6412,19843,30529,	2	5							2	6
40S ribosomal protein S13,	RPS13,	IPI00221089,	ENSP00000228140,	NP_001008,	P62277,	GLAPDLPEDLYHLIK, GLSQSALPYR, GLTPSQIGVILR, KGLTPSQIGVILR, LTSDDVKEQIYK	151	17222.13,	0.331126	11.1909	5	3723,3735,5515,5622,5840,5843,6412,	5	14			4	3	7	3	11	11		6	4	3	2	5
40S ribosomal protein S16,	RPS16,	IPI00221092,	ENSP00000251453,	NP_001011,	P62249,	EIKDILIQYDR, GPLQSVQVFGR, LLEPVLLLGK	146	16445.195,	0.219178	10.8059	3	3735,5515,5622,5840,5843,6412,	5	13		3		4	2		2	11		6		9	4
40S ribosomal protein S17,similar to 40S ribosomal protein S17 isoform 1,	LOC402057,RPS17,	IPI00221093,IPI00414603,	ENSP00000346045,ENSP00000346046,	NP_001012,NP_001073968,XP_001133476,XP_944575,	P08708,	DNYVPEVSALDQEIIEVDPDTK, LLDFGSLSNLQVTQPTVGMNFK	135, 135	15550.02,15602.23,	0.325926	10.3318	2	3735,5622,5840,5843,6412,		3								2
Similar to Antiquitin,similar to antiquitin,	ALDH7A1,	IPI00221234,IPI00786942,	ENSP00000297542,	NP_001173,XP_001127838,	P49419,	GAPTTSLISVAVTK, IQVLGSLVSLEMGK, VGNPWDPNVLYGPLHTK, VNLLSFTGSTQVGK	539, 549	58486.7,59227.51,	0.108465	8.01948	4	5575,5739,6081,7605,8152,16491,		4	3			2	2						3	2		3
Myosin light polypeptide 3,	MYL3,	IPI00243742,	ENSP00000292327,	NP_000249,	P08590,	AAPAPAPPPEPERPK, ALGQNPTQAEVLR, DTGTYEDFVEGLR, EAFMLFDR, HVLATLGER, IEFTPEQIEEFK, IEFTPEQIEEFKEAFMLFDR, IKIEFTPEQIEEFK, ITYGQCGDVLR, LMAGQEDSNGCINYEAFVK, MMDFETFLPMLQHISK, NKDTGTYEDFVEGLR	195	21931.91,	0.615385	4.7455	12	3774,5509,5859,6936,8307,16459,	471	388	348	249	352	275	520	363	379	509	184	265	260	360	278	332
60S ribosomal protein L21,Ribosomal protein L21 variant (Fragment),similar to 60S ribosomal protein L21,similar to 60S ribosomal protein L21 isoform 1,similar to ribosomal protein L21 isoform 2,	LOC641293,LOC653156,LOC728501,LOC729402,LOC731567,RPL21,	IPI00247583,IPI00472596,IPI00480032,IPI00788010,IPI00845507,	ENSP00000346027,ENSP00000351021,ENSP00000354395,ENSP00000370569,ENSP00000370574,	NP_000973,XP_001126891,XP_001127402,XP_001127420,XP_001127887,XP_001133205,XP_001133517,XP_001133519,XP_001133535,XP_932059,XP_940793,	P46778,	TNGKEPELLEPIPYEFMA, VYNVTQHAVGIVVNK	160, 140, 160, 160, 163	18564.815,16171.885,18490.705,18594.845,18891.21,	0.211384	11.255	2	3735,5622,5840,5842,6412,										5
NADH dehydrogenase [ubiquinone] 1 beta subcomplex subunit 9,NADH-ubiquinone oxidoreductase B22 subunit,	NDUFB9,	IPI00255052,IPI00790752,	ENSP00000276689,	NP_004996,	Q9Y6M9,	AFLASGPYLTHQQK, AMYPDYFAK, EAEEEFWYR, EGDLPPLWWYIVTR, EGDLPPLWWYIVTRPR, KEGDLPPLWWYIVTRPR, QHPQPYIFPDSPGGTSYER, QLQEETPPGGPLTEALPPAR, QLQEETPPGGPLTEALPPARK	179, 168	21830.75,20383.035,	0.507715	8.31122	9	3954,5739,5743,5747,6120,7605,8137,16020,16491,	45	15	42	38	36	19	23	19	29	49	10	27	18	20	35	23
Enoyl coenzyme A hydratase domain-containing protein 3,	ECHDC3,	IPI00256376,	ENSP00000368517,	NP_078969,		DGQEGITAFLQK, KIASLSRPVVSLGK, KVALEMLFTGEPISAQEALLHGLLSK, QLPQDLGTAYYLTSQAMVDNLALR, SLQSDILHDADSNDLK, VALEMLFTGEPISAQEALLHGLLSK, VIIISAEGPVFSSGHDLK, VVPEAELQEETMR	303	32633.37,	0.405941	8.82076	8	3824,8152,	7	8	7	6	2	5	14	6		7		4	5	3	4	5
Mammalian ependymin-related protein 1 precursor,ependymin related protein 1 precursor,	EPDR1,	IPI00259102,IPI00657648,	ENSP00000199448,	NP_060019,	Q9UM22,	ALLSYDGLNQR, DGVMFQIDQATK, FFDIQLGIK, LFEYILLYK	224, 344	25436.905,38150.215,	0.151111	8.20754	4	5509,5576,7160,		3					5	6		4		10	10			8
Glycerol uptake/transporter homolog,	HHATL,	IPI00289147,	ENSP00000310621,	NP_065758,	Q9HCP6,	FHAQVSQVEPVR, GLLEASQDGAHR, HYSLADLLK, TALPAAELGLYSLVLSGALAYAGR	504	56702.705,	0.113095	7.12916	4	3674,5737,8150,16020,16021,	2	2	2				2						4		2	2
keratin 4,	KRT4,	IPI00290078,	ENSP00000293774,	NP_002263,	P19013,	LALDIEIATYR, NLDLDSIIAEVR, VDSLNDEINFLK	594	63910.595,	0.0589226	8.37926	3	5198,5882,7010,30855,50680,													37
Endonuclease G, mitochondrial precursor,	ENDOG,	IPI00290614,	ENSP00000361725,	NP_004426,	Q14249,	AMDDTFYLSNVAPQVPHLNQNAWNNLEK, ASGLLFVPNILAR, FLVPIESIER, GALWVVEQLRPER, NHVAVPTHFFK, TYVMPNAPVDEAIPLER, VLILEAAGGQIELR, YGLPGLAQLK	297	32645.97,	0.390572	9.82666	8	287,3677,4519,5739,6259,16787,30145,	9	6	10	7	12		7	2	7			13	5	3	11	9
24 kDa protein,Isoform 1 of Nicotinamide mononucleotide adenylyltransferase 3,Isoform 2 of Nicotinamide mononucleotide adenylyltransferase 3,	NMNAT3,	IPI00290687,IPI00410337,IPI00798366,	ENSP00000296202,ENSP00000340523,	NP_835471,	Q96T66-1,Q96T66-2,	ALFSTPAAVPELK, EPVQNEISATYIR, LALQTSDWIR, YLIPDAVITYIK	252, 215, 210	28321.525,24118.56,23616.035,	0.214101	9.57667	4	9058,9435,16779,			2	2	3				3
Uncharacterized protein C18orf19,	C18orf19,	IPI00290799,	ENSP00000323635,	NP_001092271,NP_689565,	Q96ND0,	NSQSGNALTAYALFK, YTVTLGGTSVTVK	272	30804.515,	0.102941	10.3923	2	16020,16021,					3	3			6
Malate dehydrogenase, cytoplasmic,	MDH1,	IPI00291005,	ENSP00000233114,	NP_005908,	P40925,	DVIATDKEDVAFK, ELTEEKESAFEFLSSA, EVGVYEALKDDSWLK, FVEGLPINDFSR, GEFVTTVQQR, NVIIWGNHSSTQYPDVNHAK	334	36425.795,	0.257485	7.44733	6	4470,5737,5829,6096,6099,6108,16491,30060,		3	4		3		3		3			2	3		2	2
Malate dehydrogenase, mitochondrial precursor,	MDH2,	IPI00291006,	ENSP00000327070,	NP_005909,	P40926,	AGAGSATLSMAYAGAR, AKAGAGSATLSMAYAGAR, ANTFVAELK, ANTFVAELKGLDPAR, EGVVECSFVK, FVFSLVDAMNGK, GCDVVVIPAGVPR, GYLGPEQLPDCLK, HGVYNPNK, HGVYNPNKIFGVTTLDIVR, IFGVTTLDIVR, IQEAGTEVVK, KGEDFVK, LTLYDIAHTPGVAADLSHIETK, MISDAIPELK, SQETECTYFSTPLLLGK, TIIPLISQCTPK, TIIPLISQCTPKVDFPQDQLTALTGR, VAVLGASGGIGQPLSLLLK, VAVLGASGGIGQPLSLLLKNSPLVSR, VDFPQDQLTALTGR, VNVPVIGGHAGK, VSSFEEK	338	35530.995,	0.701183	8.90167	23	5739,5759,6096,6099,6108,8150,16491,30060,	515	499	481	489	697	307	478	455	504	502	362	619	477	480	539	490
NADH-ubiquinone oxidoreductase flavoprotein 3 isoform a precursor,	NDUFV3,	IPI00291016,	ENSP00000346196,	NP_066553,		LLATQTAAELSK, TLLQKPHVDITDPEKPHQPK	473	50983.71,	0.0676533	9.86412	2	8137,																2
28 kDa protein,NADH dehydrogenase [ubiquinone] flavoprotein 2, mitochondrial precursor,	NDUFV2,	IPI00291328,IPI00646556,	ENSP00000327268,	NP_066552,	P19404,	AAAVLPVLDLAQR, DIEEIIDELK, DTPENNPDTPFDFTPENYK, DTPENNPDTPFDFTPENYKR, GPGFGVQAGL, NSDSILEAIQK, NSDSILEAIQKK, QNGWLPISAMNK, VAEVLQVPPMR, VYEVATFYTMYNR	249, 252	27391.36,27907.035,	0.403208	8.16312	10	5739,5747,6118,6120,7399,16020,16491,46872,51287,51537,	62	101	104	97	119	57	74	67	88	78	49	85	63	66	113	67
ADP/ATP translocase 3,	SLC25A6,	IPI00291467,	ENSP00000370808,	NP_001627,	P12236,	DFLAGGIAAAISK, EQGVLSFWR, GMGGAFVLVLYDELK, GMGGAFVLVLYDELKK	298	32866.025,	0.127517	10.2581	4	5215,5471,5515,5739,5744,6810,6839,6915,16020,16021,										167
SPRY domain-containing protein 4,	SPRYD4,	IPI00291643,	ENSP00000338034,	NP_997227,	Q8WW59,	APVEGIGQPEK, EWAVVLADTAVTSGR, IGVADVDMSR, LSLVDVSQVSVVHTLQTDFR, SWVFTYAQR, TAHSSLALFR, VGLLLEYEAQK, YGLVGLEPTK	207	23098.28,	0.463768	6.94862	8	0,	23	23	13		12	7	5	3	19	31		19		4	14	3
Uncharacterized protein C2orf47, mitochondrial precursor,	C2orf47,	IPI00291751,	ENSP00000295079,	NP_078796,	Q8WWC4,	EFTQGVKPDWTIAR, FDLLEELVAK, MIVLGFSNPINWVR, QLLSASYEFQR	291	32544.29,	0.168385	9.57544	4	0,		4			2	2	4		6			4	2			2
Isoform 1 of Reticulon-4-interacting protein 1, mitochondrial precursor,	RTN4IP1,	IPI00291972,	ENSP00000358059,	NP_116119,	Q8WWV3-1,	IKGEEFPLTLGR, IRPVIEQTFPFSK, KLGADDVIDYK, LGIADGMLQTGVTVGSK, QGTLSEFVVVSGNEVSHKPK, SLTHTQAASLPYVALTAWSAINK, VHAASVNPIDVNMR	396	43589.395,	0.277778	9.58025	7	5739,8270,16491,	2	2	6		6		4	4	6	10		3	3		5
Isoform 1 of Frataxin, mitochondrial precursor,	FXN,	IPI00293425,	ENSP00000366482,	NP_000135,	Q16595-1,	LDLSSLAYSGK, LGGDLGTYVINK, SGTLGHPGSLDETTYER, TKLDLSSLAYSGK	210	23134.895,	0.2	8.99321	4	4428,5381,5739,6118,6879,7268,9055,16192,	9	11		6	6		6	3	8	8		6	5	7	5	6
19 kDa protein,22 kDa protein,Mitochondrial 39S ribosomal protein L23,Uncharacterized protein MRPL23,	MRPL23,	IPI00293476,IPI00658024,IPI00853031,IPI00853201,	ENSP00000228013,ENSP00000370925,ENSP00000370930,ENSP00000370937,	NP_066957,	Q16540,	NYLEGIYNVPVAAVR, PGVAQPEDTVQFR, TNFFIQLVR, TNFFIQLVRPGVAQPEDTVQFR	153, 163, 166, 191	17781.09,18529.57,18817.535,21842.08,	0.221358	11.3169	4	166,3723,3735,5739,5762,6412,30529,	6	6			5				4	6		4
Hydroxymethylglutaryl-CoA lyase, mitochondrial precursor,	HMGCL,	IPI00293564,	ENSP00000235958,ENSP00000363611,ENSP00000363614,	NP_000182,	P35914,	EVVIFGAASELFTK, FPGINYPVLTPNLK, GFEAAVAAGAK, LIDMLSEAGLSVIETTSFVSPK	325	34359.84,	0.187692	8.71219	4	4419,5739,5759,6091,6520,16829,	15	17	9	6	18	7	15	16	18	23	3	17	14		7	12
Keratin, type II cytoskeletal 6B,	KRT6B,	IPI00293665,	ENSP00000252252,	NP_005546,	P04259,	ADTLTDEINFLR, ALYDAELSQMQTHISDTSVVLSMDNNR, ATGGGLSSVGGGSSTIK, NKLEGLEDALQK, YEELQVTAGR	564	59998.435,	0.138298	8.16366	5	5200,5882,7398,	11		3		5	17	16	56	12		11	18	41	4	9	77
glutathione peroxidase 1 isoform 1,	GPX1,	IPI00293975,	ENSP00000373481,	NP_000572,	P07203,	EALPAPSDDATALMTDPK, FLVGPDGVPLR, FLVGPDGVPLRR, LAAAAAAAQSVYAFSAR, PLAGGEPVSLGSLR	203	22041.03,	0.300493	6.5029	5	302,4602,5737,5739,8430,8631,16491,	7	7	7	9	12	3	15	9	7	10	3	15	11	10	8	9
Ubiquinone biosynthesis protein COQ7 homolog,	COQ7,	IPI00294073,	ENSP00000322316,	NP_057222,	Q99807,	DEELEHHDIGLDHDAELAPAYAVLK, FNELMVMFR, FRDEELEHHDIGLDHDAELAPAYAVLK, IYAGQMAVLGR, KFNELMVMFR, SSGMTLDNISR, TLMEEDPEKYEELLQLIK, TLMEEDPEKYEELLQLIKK, TSVGPVIQK, VAIYLSER, VAIYLSERL, YEELLQLIK	217	24306.85,	0.442396	8.79892	12	5634,5739,6094,6744,16491,19538,46914,	51	110	35	29	45	49	36	31	84	66	35	56	49	35	10	34
Isoform 1 of Serine beta-lactamase-like protein LACTB, mitochondrial precursor,Uncharacterized protein LACTB,	LACTB,	IPI00294186,IPI00749059,	ENSP00000261893,ENSP00000347231,	NP_116246,	P83111-1,	EKFENSIESLR, EVWSEGLGYADVENR, FENSIESLR, FGNAMLYGYQVGLFK, HYASHTGGAVGASSVLLVLPEELDTETINNK, IALEFDKDR, IFHDLDMLTTVQEENEPVIYNR, LDLDIPVQHYVPEFPEK, LDLDIPVQHYVPEFPEKEYEGEK, LLISHLSGIR, LVNTPYVDNSYK, SLTMVALAK, WAGGGFLSTVGDLLK	547, 547	60693.15,60721.16,	0.314442	8.68451	13	5739,8800,30655,46677,	21	23	7	7	29	4	15	11	19	23	3	22	20	3	6	14
Delta-sarcoglycan,	SGCD,	IPI00294216,			Q92629,	EIQSQPGNALYFK, LEGDSEFLQPLYAK, LLFSADNNEVVVGAER, LPHGSYTPTGTR, VLGAEGTVFPK, VLTQLITGPK, VMNFTIDGMGNLR	290	32174.265,	0.306897	9.34887	7	5737,5856,5886,7010,7517,16012,16021,	2	8	8	5	3	4	8	5	5	2	3	7	5	4	5	6
Isoform 1 of Hydroxyacyl-coenzyme A dehydrogenase, mitochondrial precursor,Isoform 2 of Hydroxyacyl-coenzyme A dehydrogenase, mitochondrial precursor,	HADH,	IPI00294398,IPI00298406,	ENSP00000265168,ENSP00000312288,	NP_005318,	Q16836-1,Q16836-2,	AGDEFVEK, DTPGFIVNR, FAAEHTIFASNTSSLQITSIANATTR, FAGLHFFNPVPVMK, FIVDGWHEMDAENPLHQPSPSLNK, GDASKEDIDTAMK, HVTVIGGGLMGAGIAQVAAATGHTVVLVDQTEDILAK, LDKFAAEHTIFASNTSSLQITSIANATTR, LGAGYPMGPFELLDYVGLDTTK, LLVPYLMEAIR, TFESLVDFSK, TGEGFYK, TLSTIATSTDAASVVHSTDLVVEAIVENLK, VKNELFK	314, 390	34277.235,42123.135,	0.635244	9.626	14	3857,5737,5739,5743,6629,6631,16491,50662,	213	366	389	157	331	133	236	218	303	232	77	322	217	214	349	193
Isoform 1 of Protein-glutamine gamma-glutamyltransferase 2,	TGM2,	IPI00294578,	ENSP00000355330,	NP_004604,	P21980-1,	ALLVEPVINSYLLAER, YLLNLNLEPFSEK	687	77328.21,	0.0422125	4.86386	2	3810,5509,8415,16740,18149,45785,		2					2		2			2	2
Succinate dehydrogenase [ubiquinone] iron-sulfur subunit, mitochondrial precursor,	SDHB,	IPI00294911,	ENSP00000364649,	NP_002991,	P21912,	AGDKPHMQTYEVDLNK, DLVPDLSNFYAQYK, IKNEVDSTLTFR, IYPLPHMYVIK, LQDPFSLYR, NEVDSTLTFR, QQYLQSIEER, SIEPYLK, WDPDKAGDKPHMQTYEVDLNK, YLGPAVLMQAYR	280	31629.365,	0.342857	8.91943	10	5506,5739,5743,6099,6118,6810,8177,9055,16020,46872,51537,51538,51539,	76	69	71	62	90	43	58	45	68	79	31	75	48	44	70	50
Isoform 1 of 39S ribosomal protein L48, mitochondrial precursor,Isoform 2 of 39S ribosomal protein L48, mitochondrial precursor,	MRPL48,	IPI00295066,IPI00807664,	ENSP00000308717,	NP_057139,	Q96GC5-1,Q96GC5-2,	ARPELEELLAK, MLLDSVLTTHER, TIEVLQLQDQGSK	261, 113	29310.61,12769.56,	0.228258	7.42499	3	3735,5622,5739,5840,6412,	7	6	7	6	4	2	5	4	7	9		6	5		4	6
Signal recognition particle receptor subunit beta,	SRPRB,	IPI00295098,	ENSP00000273406,	NP_067026,	Q9Y5M8,	GNSLTLIDLPGHESLR, VADGGGAGGTFQPYLDTLR	271	29701.88,	0.129151	9.47386	2	166,4872,5515,5525,5783,5786,16020,16021,30529,		4								3
24 kDa protein,Carbonyl reductase [NADPH] 1,	CBR1,	IPI00295386,IPI00795334,	ENSP00000290349,	NP_001748,	P16152,	EYGGLDVLVNNAGIAFK, GQAAVQQLQAEGLSPR	277, 222	30374.73,24498.545,	0.133891	8.70606	2	5737,5829,8152,16491,47021,50221,							2	2					2
26 kDa protein,Cytochrome c oxidase assembly protein COX11, mitochondrial precursor,	COX11,	IPI00295394,IPI00794128,	ENSP00000299335,	NP_004366,	Q9Y6N1,	NPTDKPVIGISTYNIVPFEAGQYFNK, TTLTYVAAVAVGMLGASYAAVPLYR	276, 231	31429.745,26132.81,	0.202781	9.96235	2	5507,5739,7585,8535,9055,16020,16021,													2
4 kDa protein,HIG1 domain family member 1A,HIG1 domain family, member 1A isoform a,	HIGD1A,	IPI00295621,IPI00792442,IPI00856008,	ENSP00000319393,	NP_001093138,NP_001093139,NP_054775,	Q9Y241,	MSIHLIHMR, VAAQGFVVGAMTVGMGYSMYR	93, 38, 107	10142.86,4299.175,11769.78,	0.464143	10.2231	2	5515,16020,16021,43234,	6		6	7			2
113 kDa protein,Glycoprotein IIb,Isoform 1 of Integrin alpha-IIb precursor,	ITGA2B,	IPI00295976,IPI00747241,IPI00783275,	ENSP00000262407,ENSP00000366268,ENSP00000373727,ENSP00000373728,	NP_000410,	P08514-1,	GEAQVWTQLLR, NRPPLEEDDEEGE	1039, 285, 1037	113389.98,32022.59,113169.91,	0.0434845	5.30055	2	7155,7229,8305,16020,42802,											3
Isoform 1 of ATPase family AAA domain-containing protein 3A,Isoform 2 of ATPase family AAA domain-containing protein 3A,	ATAD3A,	IPI00295992,IPI00643435,	ENSP00000368030,ENSP00000368031,	NP_060658,	Q9NVI7-1,Q9NVI7-2,	ATLNAFLYR, DALNLAQMQEQTLQLEQQSK, DKWSNFDPTGLER, GLLLFVDEADAFLR, INEMVHFDLPGQEER, ITVLEALR, LLSRPQDALEGVVLSPSLEAR, QQQLLNEENLR, TAGTLFGEGFR	586, 634	66217.685,71368.565,	0.20031	9.58641	9	166,5515,5524,17111,	4		6	8	7		6		3	3		5	6	5	7	3
Isoform Cytoplasmic of Fumarate hydratase, mitochondrial precursor,Isoform Mitochondrial of Fumarate hydratase, mitochondrial precursor,	FH,	IPI00296053,IPI00759715,	ENSP00000355518,	NP_000134,	P07954-1,P07954-2,	AAAEVNQDYGLDPK, AIEMLGGELGSK, ETAIELGYLTAEQFDEWVKPK, IEYDTFGELKVPNDK, IPVHPNDHVNK, IYELAAGGTAVGTGLNTR, LMNESLMLVTALNPHIGYDK, LNDHFPLVVWQTGSGTQTNMNVNEVISNR, MPTPVIK, RAAAEVNQDYGLDPK, SGLGELILPENEPGSSIMPGK, SKEFAQIIK, SQSSNDTFPTAMHIAAAIEVHEVLLPGLQK, THTQDAVPLTLGQEFSGYVQQVK, VAALTGLPFVTAPNK, VPNDKYYGAQTVR	510, 467	54636.585,50212.43,	0.520968	8.30526	16	4333,5737,5739,6099,6106,7049,16829,45239,45786,	79	109	78	83	115	50	99	90	94	66	63	95	100	60	66	104
Thrombospondin-1 precursor,	THBS1,	IPI00296099,	ENSP00000260356,	NP_003237,	P07996,	GGVNDNFQGVLQNVR, IEDANLIPPVPDDKFQDLVDAVR	1170	129381.665,	0.0324786	4.50906	2	4866,4871,5198,5509,5515,5576,6928,6954,7155,7275,7399,7596,8201,16525,													2
25 kDa protein,Uncharacterized protein C10orf57,Uncharacterized protein C10orf58 precursor,	C10orf57,C10orf58,	IPI00296190,IPI00646289,IPI00646889,	ENSP00000361254,ENSP00000361259,ENSP00000361261,ENSP00000361262,	NP_115709,	Q9BRX8,	AALEYLEDIDLK, EKEFGDKVNLLSVLEAAK, SMLDQLGVPLYAVVK, VNLLSVLEAAK	229, 224, 218	25763.94,25157.205,24462.475,	0.201274	9.39612	4	0,	5	9	7	13	5		8	8	10	14	2	9	8	5	7	5
ATP synthase mitochondrial F1 complex assembly factor 2, mitochondrial precursor,Uncharacterized protein ATPAF2,	ATPAF2,	IPI00296999,IPI00784208,	ENSP00000304017,ENSP00000373774,ENSP00000373775,	NP_663729,	Q8N5M1,	LTVEQAVLLSR, NEWDPIIEWAEK, SMVLTLGLIDLR, VEEPETLVELQR, WGNIEWAHDYELQELR, YGVEISSSTSIMGPSIPAK	290, 289	32881.245,32772.09,	0.283248	7.3278	6	5515,5739,6457,43461,		5	2	3	6		3		5	6		6	4
dolichyl-diphosphooligosaccharide-protein glycosyltransferase precursor,	DDOST,	IPI00297084,	ENSP00000364188,	NP_005207,	P39656,	LGYTHLYSSTQVSVRPLQHTQYER, NTLLIAGLQAR, SSLNPILFR	456	50800.335,	0.0964912	6.51793	3	4579,5515,5783,8250,16020,16021,16740,18279,			3
Pyruvate dehydrogenase protein X component, mitochondrial precursor,	PDHX,	IPI00298423,	ENSP00000227868,	NP_003468,	O00330,	ANLENPIR, DVGPPPPVSKPSEPR, GIQEIADSVK, HSLDASQGTATGPR, ILMPSLSPTMEEGNIVK, ITESRPTPAPTATPTAPSPLQATAGPSYPR, LGSLIGLIVEEGEDWK, PSEPRPSPEPQISIPVK, PSEPRPSPEPQISIPVKK, PSPEPQISIPVKK, PVIPPVSTPGQPNAVGTFTEIPASNIR, QLITVTMSSDSR, QLPFIDISVAVATDK, QMPDVNVSWDGEGPK, STVPHAYATADCDLGAVLK, VRQDLVKDDIK, VSVNDFIIK, VVDDELATR	501	54121.76,	0.479042	9.09036	18	5515,5739,8152,8415,31405,	33	27	49	18	43	4	43	17	20	21		26	49	7	42	14
Protein DJ-1,	PARK7,	IPI00298547,	ENSP00000340278,ENSP00000366708,ENSP00000366711,ENSP00000366713,	NP_009193,	Q99497,	EGPYDVVVLPGGNLGAQNLSESAAVK, GAEEMETVIPVDVMR	189	19890.88,	0.216931	6.78125	2	5515,5634,5737,6457,7265,8344,42542,51583,	6				7		6	5	6	5		9
73 kDa protein,Growth-inhibiting protein 12,Lactotransferrin precursor,	LTF,	IPI00298860,IPI00789477,IPI00848342,	ENSP00000231751,	NP_002334,	P02788,	ADAVTLDGGFIYEAGLAPYK, GGSFQLNELQGLK, IDSGLYLGSGYFTAIQNLR, YLGPQYVAGITNLK	711, 666, 710	78383.49,73160.205,78181.225,	0.0949613	8.09327	4	4252,5576,5615,6811,6826,6879,6959,8199,8233,42742,46872,											3		8
Calsequestrin-2 precursor,	CASQ2,	IPI00298933,	ENSP00000261448,	NP_001223,	O14958,	AFEEAAEHFQPYIK, AIGFVMVDAK, EIVLELVAQVLEHK, KLGFDEEGSLYILK, LEVQAFER, LGFDEEGSLYILK, LRPEEMFETWEDDLNGIHIVAFAEK, MNEVDFYEPFMDEPIAIPNKPYTEEELVEFVK, SDPDGYEFLEILK	399	46435.28,	0.325815	3.96641	9	5509,5790,6941,7507,16529,	25	30	40	32	28	30	56	54	28	17	12	18	35	15	21	23
Keratin, type II cytoskeletal 6C,	KRT6C,	IPI00299145,	ENSP00000252250,	NP_775109,	P48668,	AIGGGLSSVGGGSSTIK, SGFSSISVSR, TAAENEFVTLK, TAAENEFVTLKK	564	60024.505,	0.0691489	8.16366	4	5198,5882,7010,	1				1	2		8	3		3		13	1	5	22
Calcium channel, voltage-dependent, L type, alpha 1S subunit,Voltage-dependent L-type calcium channel subunit alpha-1S,calcium channel, voltage-dependent, L type, alpha 1S subunit,	CACNA1S,	IPI00299240,IPI00514837,IPI00642897,	ENSP00000263942,ENSP00000355192,ENSP00000356305,ENSP00000356307,	NP_000060,	Q13698,	AVPIPEASSFFIFSPTNK, HLDVVTLLR, IALVDGTQINR, LVSGVPSLQVVLNSIFK, MTTYGAFLHK, NNNFQTFPQAVLLLFR, TEGNFEQANEELR, VLLSLFTTEMLMK, YDFEDTEVR	1875, 1873, 1856	212556.32,212348.1,210798.335,	0.0620998	6.55292	9	5244,5245,5509,5891,6811,6816,16020,16021,	7	14	10	3		6	11	6	7	21	4	19	12	4	12	13
Lipocalin 2,Neutrophil gelatinase-associated lipocalin precursor,Uncharacterized protein LCN2,	LCN2,	IPI00299547,IPI00643623,IPI00743064,	ENSP00000277480,ENSP00000362089,ENSP00000362104,ENSP00000362108,	NP_005555,	P80188,	VPLQQNFQDNQFQGK, WYVVGLAGNAILR	198, 200, 200	22587.915,22788.065,22902.265,	0.140471	9.07296	2	5215,5488,5625,5737,6810,											4
Isoform 1 of Protein disulfide-isomerase A6 precursor,Isoform 2 of Protein disulfide-isomerase A6 precursor,	PDIA6,	IPI00299571,IPI00644989,	ENSP00000272227,ENSP00000371011,ENSP00000371024,	NP_005733,	Q15084-1,Q15084-2,	GSFSEQGINEFLR, GSTAPVGGGAFPTIVER, LAAVDATVNQVLASR, TGEAIVDAALSALR	492, 440	53900.385,48120.875,	0.127005	4.82634	4	3756,5515,5783,5793,6457,16853,45454,							6			2			3	3		3
60S ribosomal protein L7a,Ribosomal protein L7a,Uncharacterized protein ENSP00000351738,similar to 60S ribosomal protein L7a isoform 1,	LOC388474,RPL7A,	IPI00299573,IPI00397676,IPI00478896,IPI00479315,	ENSP00000346018,ENSP00000346868,ENSP00000351738,ENSP00000361076,ENSP00000372524,	NP_000963,XP_371115,XP_938407,XP_943274,	P62424,	AGVNTVTTLVENK, LKVPPAINQFTQALDR, NFGIGQDIQPK, VPPAINQFTQALDR	266, 266, 202, 270	29995.425,30041.465,22655.915,30548.205,	0.16173	11.3851	4	3735,5622,5624,5840,5842,6412,42254,42788,		6	3		4	3	7	2	5			7	2			2
Isoform 1 of 3,2-trans-enoyl-CoA isomerase, mitochondrial precursor,Isoform 2 of 3,2-trans-enoyl-CoA isomerase, mitochondrial precursor,	DCI,	IPI00300567,IPI00398758,	ENSP00000301729,	NP_001910,	P42126-1,P42126-2,	AVQELWLR, DADVQNFVSFISK, DTLENTIGHR, SLQMYLER, SPAHYAGYWK, VLVEPDAGAGVAVMK	302, 285	32815.635,30895.4,	0.218241	8.95959	6	4165,5739,5759,6629,6631,6635,8152,16853,	65	59	76	65	57	48	55	48	60	65	43	61	52	54	59	57
Keratin, type II cytoskeletal 6A,	KRT6A,	IPI00300725,	ENSP00000369317,	NP_005545,	P02538,	AEAESWYQTK, GMQDLVEDFK, LEGLEDALQK, LLKEYQELMNVK, NTKQEIAEINR, QEIAEINR, SGFSSVSVSR	564	60044.525,	0.111702	8.16366	7	5198,5515,5882,7398,													16			27
Isoform 1 of Tripartite motif-containing protein 72,	TRIM72,	IPI00301028,	ENSP00000312675,	NP_001008275,	Q6ZMU5-1,	ALMPALEELTFDPSSAHPSLVVSSSGR, AVAVVAHQQLSEGEHYWEVDVGDKPR, ELGSLNSYLEQLR, LDIQLPIISDDFK, LHAVPSQGLWLLGLR, SVAVLEHQLVEVEETVR, VFLAALEGSLDR, VLEEVADKPQTEFLMK, WALGVIAAEAPR	477	52730.06,	0.316562	6.45307	9	5515,5622,8270,46872,	17	11	12	7	11	7	8	12	12	4		15	6	4	2	6
Isoform 1 of Inorganic pyrophosphatase 2, mitochondrial precursor,Isoform 2 of Inorganic pyrophosphatase 2, mitochondrial precursor,Isoform 3 of Inorganic pyrophosphatase 2, mitochondrial precursor,Uncharacterized protein PPA2,inorganic pyrophosphatase 2 isoform 3 precursor,inorganic pyrophosphatase 2 isoform 5 precursor,	PPA2,	IPI00301109,IPI00413014,IPI00470502,IPI00470503,IPI00654717,IPI00746507,	ENSP00000273977,ENSP00000313061,ENSP00000343885,ENSP00000349996,ENSP00000369338,ENSP00000369340,	NP_001029363,NP_008834,NP_789842,NP_789845,	Q9H2U2-1,Q9H2U2-2,Q9H2U2-3,	AFALEVIK, ILGILALIDEGETDWK, LIAINANDPEASK, NVTGHYISPFHDIPLK, VPDGKPENQFAFNGEFK	334, 232, 349, 305, 316, 274	37919.925,25991.455,39637.84,34657.47,35731.345,31575.885,	0.236397	7.66611	5	287,4427,5737,5739,6796,		8	8		7		3	3	7	6			5		6
Retinol dehydrogenase 13,	RDH13,	IPI00301204,	ENSP00000291892,		Q8NBN7,	APAPEAEDEEVAR, LVGLEAPSVR, SPELAAQPSTYLAVAEELADVSGK, YLLPLSALGTVAGAAVLLK	331	35931.85,	0.199396	8.2373	4	8152,16491,	4	7	4		5	2	4		4			6	3			2
Isoform 1 of Trimethyllysine dioxygenase, mitochondrial precursor,	TMLHE,	IPI00301224,	ENSP00000335261,	NP_060666,	Q9NVH6-1,	APEEFELLSK, AVINTVPYDVVHR	421	49517.2,	0.0546318	7.78514	2	5506,5739,6118,16491,16702,31418,45329,50353,			3
Isoform SGCA-1 of Alpha-sarcoglycan precursor,Isoform SGCA-2 of Alpha-sarcoglycan precursor,Uncharacterized protein SGCA,	SGCA,	IPI00301464,IPI00412663,IPI00783326,	ENSP00000262018,ENSP00000345522,ENSP00000374281,ENSP00000374282,	NP_000014,	Q16586-1,Q16586-2,	GLQVIEVTAYNR, SHDAEEVLPSTPASR	387, 263, 387	42874.71,29354.14,42904.69,	0.0807322	5.84767	2	5509,5515,5737,5856,7517,16010,16012,16020,16021,		2					2									2
myosin heavy chain 6,	MYH6,	IPI00302328,	ENSP00000348634,	NP_002462,		ALQEAHQQALDDLQVEEDKVNSLSK, LTGAIMHYGNMK	1939	223733.01,	0.019082	5.45196	2	146,166,1701,2026,2027,3779,5516,5524,5863,6941,7512,7522,8217,8307,16459,16887,30017,30048,30049,30898,43462,45214,48739,55009,55010,	12	6	8	3	4	5	11	12	8	10		2	4	3	5	4
Filamin-A,filamin A, alpha,	FLNA,	IPI00302592,IPI00333541,	ENSP00000349183,ENSP00000353467,ENSP00000358866,ENSP00000358879,	NP_001447,	P21333,	AFGPGLQGGSAGSPAR, ASGPGLNTTGVPASLPVEFTIDAK, FGGEHVPNSPFQVTALAGDQPSVQPPLR, GAGTGGLGLAVEGPSEAK, IANLQTDLSDGLR, LPQLPITNFSR, SPFSVAVSPSLDLSK, VTAQGPGLEPSGNIANK	2639, 2647	280016.75,280737.58,	0.053727	5.94115	8	4871,5634,5737,6928,7166,7399,8134,15629,30036,42993,43123,43433,51015,				4					1				6	2
ATP synthase mitochondrial F1 complex assembly factor 1 isoform 1 precursor,ATP synthase mitochondrial F1 complex assembly factor 1 isoform 2 precursor,	ATPAF1,	IPI00302673,IPI00783728,	ENSP00000361005,	NP_001036011,NP_073582,		DKTLSSIFNIEMVK, ETYGLVETFNLRPNEFK, FDLIWNR, KETYGLVETFNLRPNEFK, QIWQQYFAAK, TLSSIFNIEMVK, YMSVIAELEQSGLGAELK	328, 260	36436.255,28657.385,	0.23098	8.61697	7	5739,6461,	5			4					4	5		9	5		3
Isoform 1 of Enoyl-CoA hydratase domain-containing protein 1,OTTHUMP00000017168,Uncharacterized hypothalamus protein HCDASE,Uncharacterized protein ECHDC1,	ECHDC1,	IPI00302688,IPI00479537,IPI00550928,IPI00645630,	ENSP00000207783,ENSP00000311115,ENSP00000357278,ENSP00000357289,		Q9NTX5-1,Q9NTX5-2,	DLLGTVWGGPANLEAIAK, VIELENWTEGK	307, 286, 303, 222	33697.78,31302.925,33155.08,24341.095,	0.10555	7.94132	2	3824,8152,												2
Isoform 1 of Transmembrane protein 143,	TMEM143,	IPI00303120,	ENSP00000293261,	NP_060743,	Q96AN5-1,	ALAHLQALTPSMGLYPPPGFPK, DTPLEGLEQLLPELK, EALLAHSFLAR, LDPVAPITSEPPQATPSSNIS, LLIQEFHSSPAEK, LQALYDPINPDRETLDQPSLTDPQR, SAQALELAHMLYYR, SEVENWLLAK, SFKDTPLEGLEQLLPELK, STSNNSELLSALALR	459	51714.47,	0.324619	10.1491	10	5739,16020,16021,	7	8	6	9	11	2	7	7	8	5	2	11	15	7	9	9
ATP synthase subunit beta, mitochondrial precursor,	ATP5B,	IPI00303476,	ENSP00000262030,	NP_001677,	P06576,	ADKLAEEHSS, AHGGYSVFAGVGER, AIAELGIYPAVDPLDSTSR, DQEGQDVLLFIDNIFR, EGNDLYHEMIESGVINLK, FLSQPFQVAEVFTGHMGK, FTQAGSEVSALLGR, GFQQILAGEYDHLPEQAFYMVGPIEEAVAK, GSITSVQAIYVPADDLTDPAPATTFAHLDATTVLSR, IGLFGGAGVGK, IMDPNIVGSEHYDVAR, IMNVIGEPIDER, IMNVIGEPIDERGPIK, IPSAVGYQPTLATDMGTMQER, IPVGPETLGR, KGSITSVQAIYVPADDLTDPAPATTFAHLDATTVLSR, LVLEVAQHLGESTVR, LVPLKETIK, QFAPIHAEAPEFMEMSVEQEILVTGIK, SLQDIIAILGMD…	529	56559.42,	0.754253	5.06708	29	166,5215,5515,5524,5739,5753,5754,6091,6811,8553,15986,15992,16021,16469,16787,17111,45261,46872,46933,46961,	1473	1269	1407	1536	1543	772	1254	1384	1566	1087	1158	1280	1595	1323	1496	1307
Prostaglandin E synthase 2,	PTGES2,	IPI00303568,	ENSP00000345341,	NP_079348,	Q9H7Z7,	AFLDFHALPYQVVEVNPVR, AFLDFHALPYQVVEVNPVRR, AVNEQGKEVTEFGNK, DRPFMGGQKPNLADLAVYGVLR, EDLYEAADKWVAAVGK, FGAVEGAVAK, KVPILVAQEGESSQQLNDSSVIISALK, LQDNVREDLYEAADK, LQDNVREDLYEAADKWVAAVGK, LQLTLYQYK, SAAQLSLSSR, TPTEALASFDYIVR, TYLVSGQPLEEIITYYPAMK, VMEGLDAFDDLMQHTHIQPWYLR, VPILVAQEGESSQQLNDSSVIISALK, YMGAAAMYLISK	377	41942.76,	0.541114	9.50512	16	1516,5737,5739,6633,9055,15035,16020,16021,16853,45454,50220,	49	52	24	27	85	25	44	27	54	50	11	76	33	7	30	44
hypothetical protein LOC80221,	FLJ20920,	IPI00304071,	ENSP00000300441,	NP_079425,		DLVVAYGTTENSPVTFAHFPEDTVEQK, GATLSHYNIVNNSNILGER, GGENIYPAELEDFFHTHPK, IMNMEAGTLAK, LKDGEETTVEEIK, LTFAQLKEEVDK, VQEVQVVGVKDDR, YIVFVTNYPLTISGK	615	68124.36,	0.209756	7.60124	8	3824,8152,	4	11	12	9	20		17	7	5	4		13	14		13	5
10 kDa protein,Mitochondrial import inner membrane translocase subunit TIM14,	DNAJC19,	IPI00304306,IPI00795263,	ENSP00000372005,	NP_660304,	Q96DA6,	EAALILGVSPTANK, IMLLNHPDKGGSPYIAAK	116, 91	12498.545,10078.7,	0.313755	10.7373	2	5739,6457,6605,15031,16020,16021,31072,					5
Isocitrate dehydrogenase [NAD] subunit beta, mitochondrial precursor,Isoform A of Isocitrate dehydrogenase [NAD] subunit beta, mitochondrial precursor,Isoform B of Isocitrate dehydrogenase [NAD] subunit beta, mitochondrial precursor,	IDH3B,	IPI00304417,IPI00304419,IPI00845393,	ENSP00000370223,ENSP00000370232,ENSP00000370247,	NP_008830,NP_777280,NP_777281,	O43837-1,O43837-2,	AAAVPVEFQEHHLSEVQNMASEEK, EQTEGEYSSLEHESAR, GELASYDMR, HLNLEYHSSMIADAVK, HNNLDLVIIR, KLDLFANVVHVK, LDLFANVVHVK, NIANPTAMLLSASNMLR, VEGSFPVTMLPGDGVGPELMHAVK	389, 383, 385	42683.06,41887.02,42183.39,	0.331907	8.32587	9	287,4449,5739,6099,6102,8152,9055,16616,30145,	12	16	19	10	10	5	19	20	20	7		16	23	14	19	16
Isoform Cytoplasmic of Phospholipid hydroperoxide glutathione peroxidase, mitochondrial precursor,Isoform Mitochondrial of Phospholipid hydroperoxide glutathione peroxidase, mitochondrial precursor,	GPX4,	IPI00304814,IPI00745335,	ENSP00000346103,	NP_001034937,NP_002076,	P36969-1,P36969-2,	QEPGSNEEIKEFAAGYNVK, TEVNYTQLVDLHAR, YGPMEEPLVIEK	197, 170	22127.61,19478.355,	0.246566	8.19995	3	4602,5737,5739,6118,6644,6979,7275,8430,16491,47066,	9	10				4	2	3	6	3	4	4	7
Isoform 2C2 of Collagen alpha-2(VI) chain precursor,	COL6A2,	IPI00304840,	ENSP00000300527,	NP_001840,	P12110-1,	DYDSLAQPGFFDR, LFAVAPNQNLK	1019	108578.8,	0.0235525	6.12536	2	5201,5581,5737,6817,16020,16337,30198,30674,														3
Succinate dehydrogenase [ubiquinone] flavoprotein subunit, mitochondrial precursor,	SDHA,	IPI00305166,	ENSP00000264932,ENSP00000332417,	NP_004159,	P31040,	AAFGLSEAGFNTACVTK, DHVYLQLHHLPPEQLATR, EPIPVLPTVHYNMGGIPTNYK, GEGGILINSQGER, GSDWLGDQDAIHYMTEQAPAAVVELENYGMPFSR, GVIALCIEDGSIHR, HTLSYVDVGTGK, IDEYDYSKPIQGQQK, KHTLSYVDVGTGK, KPFEEHWR, LGANSLLDLVVFGR, LPGISETAMIFAGVDVTK, NTVVATGGYGR, SMQNHAAVFR, SMTLEIR, TGHSLLHTLYGR, VPPIKPNAGEESVMNLDK, VRIDEYDYSKPIQGQQK, VSDSISAQYPVVDHEFDAVVVGAGGAGLR, VTLEYRPVIDK, WHFYDTVK	664	72690.975,	0.441265	7.40554	21	104,5739,5749,6099,6118,6810,8177,16020,50660,	158	119	145	154	179	67	132	102	87	148	38	138	140	89	157	83
Agmatinase, mitochondrial precursor,	AGMAT,	IPI00305360,	ENSP00000364986,	NP_079034,	Q9BSE5,	GSSTTLDPYR, HGPVGLLHVDAHTDTTDK, KHGPVGLLHVDAHTDTTDK, LPVQTSPEGLDAAFIGVPLDTGTSNRPGAR	352	37660.065,	0.167614	7.65732	4	4053,5739,6527,8295,8783,9446,16787,30145,46872,		9	7		2			4	10	10		4			12	9
Ubiquinol-cytochrome-c reductase complex core protein 2, mitochondrial precursor,	UQCRC2,	IPI00305383,	ENSP00000268379,	NP_003357,	P22695,	ATAAPAGAPPQPQDLEFTK, ATQQPFDVSAFNASYSDSGLFGIYTISQATAAGDVIK, AVAFQNPQTHVIENLHAAAYR, GDVDILMEFLLNVTTAPEFR, LPNGLVIASLENYSPVSR, MALIGLGVSHPVLK, NALANPLYCPDYR, QVAEQFLNMR, RGSNTTSHLHQAVAK, RWEVADLQPQLK, SMAASGNLGHTPFVDEL, TIAQGNLSNTDVQAAK, VTSEELHYFVQNHFTSAR, WEVADLQPQLK, YEDFSNLGTTHLLR	453	48442.6,	0.538631	8.92255	15	4222,5515,5739,5746,6118,6119,6508,6810,8121,8270,9060,16020,16491,	254	221	303	233	246	145	196	264	262	168	290	243	309	251	352	260
Aflatoxin B1 aldehyde reductase member 2,	AKR7A2,	IPI00305978,	ENSP00000235835,ENSP00000339084,	NP_003680,	O43488,	ALQAAYGASAPSVTSAALR, FYAYNPLAGGLLTGK, VASVLGTMEMGR	359	39588.65,	0.128134	7.18465	3	4032,5739,5975,6081,9055,		3	5	3	5	3	6	7	5	3	2	3	4	5	3	6
Trans-2-enoyl-CoA reductase, mitochondrial precursor,	MECR,	IPI00306159,	ENSP00000263702,	NP_057095,	Q9BV79,	GFWLSQWK, GGTMVTYGGMAK, QPVVASVSLLIFK, SLGAEHVITEEELR	373	40427.4,	0.126005	9.00624	4	5739,6633,8270,16491,19166,	6	13	14		20		7	5	14	10		8	6		9	5
Mitochondrial PDHA1,	PDHA1,	IPI00306301,	ENSP00000348062,	NP_000275,	P08559,	AHGFTFTR, EIEDAAQFATADPEPPLEELGYHIYSSDPPFEVR, EILAELTGR, GPILMELQTYR, KEIEDAAQFATADPEPPLEELGYHIYSSDPPFEVR, LEEGPPVTTVLTR, MVNSNLASVEELK, MVNSNLASVEELKEIDVEVR, MVNSNLASVEELKEIDVEVRK, NFANDATFEIK, RGDFIPGLR, SDPIMLLK, SKSDPIMLLK, YGMGTSVER, YHGHSMSDPGVSYR	428	47579.175,	0.348131	8.66012	15	4739,5515,5739,6084,6096,8152,16491,	135	136	180	109	158	63	135	122	154	88	99	145	122	92	186	126
15 kDa protein,TIM21-like protein, mitochondrial precursor,	C18orf55,	IPI00306439,IPI00640038,	ENSP00000169551,	NP_054896,	Q9BVV7,	ENPGSGEYDFR, FYIEGSEPGK, SHPEVIGVFGESVK, YIFVEIESYPR	248, 132	28202.245,15132.975,	0.266984	9.58133	4	5739,6605,15031,16020,16021,	6	13			4	2		4	9	6		8	4
Import inner membrane translocase subunit TIM44, mitochondrial precursor,	TIMM44,	IPI00306516,	ENSP00000270538,	NP_006342,	O43615,	EIDDSVLGQTGPYR, GFLSGLLDNVK, IKEGVEEAAK, ILDIDNVDLAMGK, RLEESDVLQEAR, TEMSEVLTEILR, VFEPNEEALGVVLHK, VTDLLGGLFSK	452	51355.295,	0.216814	8.53186	8	166,5515,5524,5739,5744,5759,6626,15450,16020,	3	4	7		7		3	2	3	3		7	3	4	12	4
Cytochrome c oxidase polypeptide VIIa-heart, mitochondrial precursor,Protein,	COX7A1,	IPI00306720,IPI00796142,	ENSP00000292907,	NP_001855,	P24310,	GGIVDNILYR, LFQEDNDIPLYLK, QKLFQEDNDIPLYLK	79, 109	9117.44,12095.635,	0.272907	10.6583	3	4129,5746,6118,9055,16020,16021,	35	40	52	53	135	36	96	87	55	32	26	119	88	51	59	91
Isoform 1 of ATP-binding cassette sub-family B member 7, mitochondrial precursor,Isoform 2 of ATP-binding cassette sub-family B member 7, mitochondrial precursor,	ABCB7,	IPI00306748,IPI00556553,	ENSP00000253577,ENSP00000362492,	NP_004290,	O75027-1,O75027-2,	AMNIVVPFMFK, VLSGISFEVPAGK	752, 753	82640.625,82768.76,	0.0318937	9.78689	2	166,5524,5739,5743,6810,15232,16020,16021,16887,42626,					2
39S ribosomal protein L9, mitochondrial precursor,	MRPL9,	IPI00307409,	ENSP00000357823,	NP_113608,	Q9BYD2,	ENLELILTQSVENVGVR, LLPQGLAVYASPENK, NLGVVVAPHTLK, WELNPEIVAR	267	30185.08,	0.202247	10.8245	4	3735,5622,5739,5761,5840,6412,45182,		2			4				2			5			3	3
Uncharacterized protein C9orf46,	C9orf46,	IPI00307547,	ENSP00000223864,	NP_060935,	Q9HBL7,	EFMLMNAR, GMITFESIEK, MKGEAEDILETEK, QLIMQSEMR	147	17201.17,	0.272109	10.192	4	16020,16021,	29	40	4	8	16	5	9	5	20	37	3	27	11	6	20	11
NADH dehydrogenase [ubiquinone] iron-sulfur protein 7, mitochondrial precursor,NADH-ubiquinone oxidoreductase 20 kDa subunit, mitochondrial precursor,	NDUFS7,	IPI00307749,IPI00848151,	ENSP00000233627,	NP_077718,	O75251,	KVYDQMPEPR, LDDLVNWAR, QSDVMIVAGTLTNK, VYDQMPEPR	298, 272	32832.975,30272.285,	0.116031	10.6659	4	5739,5747,6120,8137,16651,32981,46872,51539,	101	163	109	111	153	104	82	89	169	125	55	102	93	75	101	92
Amine oxidase [flavin-containing] B,	MAOB,	IPI00328156,	ENSP00000367309,	NP_000889,	P27338,	APLAEEWDNMTMK, ENVLVETLNHEMYEAK, GPFPPVWNPITYLDHNNFWR, IHFNPPLPMMR, IYFAGTETATHWSGYMEGAVEAGER, LERPVIYIDQTR, LIGLTTIFSATALGFLAHK, LLHDSGLNVVVLEAR, PVIYIDQTR, VKLERPVIYIDQTR, VLGSLEALEPVHYEEK, YVDLGGSYVGPTQNR, YVISAIPPTLGMK	520	58762.475,	0.340385	7.55243	13	5739,5740,5743,6118,8131,9055,16020,16021,	29	27	25	27	23	18	29	17	13	22	10	19	25	14	21	25
Seryl-tRNA synthetase, mitochondrial precursor,Uncharacterized protein SARS2,	SARS2,	IPI00328361,IPI00784321,	ENSP00000221431,ENSP00000373919,ENSP00000373920,	NP_060297,	Q9NP81,	ALLANQDSGEVQQDPK, EAQLEEQFYLQALK, GAGALLQHGLVNFTFNK, ITAPTHVPLQYIGPNQPR, LPNQTHPDVPVGDESQAR	518, 518	58282.055,58181.935,	0.160232	8.30238	5	166,4828,5524,5737,5739,6434,	3	4	3		3		4	3	3	2		4	4	2	4	2
48 kDa protein,Solute carrier family 25 member 46,	SLC25A46,	IPI00328383,IPI00478497,	ENSP00000296626,ENSP00000348211,ENSP00000369032,	NP_620128,	Q96AG3,	GMGSTFIVQGVTLGAEGIISEFTPLPR, IIYSTLLQNNI	436, 418	47867.635,46173.675,	0.0890325	7.7331	2	5488,5739,6810,16020,16021,												2
Isoform 1 of NADH-cytochrome b5 reductase 3,Isoform 2 of NADH-cytochrome b5 reductase 3,	CYB5R3,	IPI00328415,IPI00446235,	ENSP00000338461,ENSP00000354468,	NP_000389,NP_015565,	P00387-1,P00387-2,	APEAWDYGQGFVNEEMIR, DILLRPELEELR, FALPSPQHILGLPVGQHIYLSAR, GFVDLVIK, GPSGLLVYQGK, IDGNLVVRPYTPISSDDDKGFVDLVIK, LIDREIISHDTR, LWYTLDR, MSQYLESMQIGDTIEFR, PYTPISSDDDKGFVDLVIK, STPAITLESPDIK, STPAITLESPDIKYPLR, SVGMIAGGTGITPMLQVIR	301, 278	34234.55,31628.385,	0.56393	7.67131	13	4128,5737,5739,5783,5833,6118,6695,6826,8015,16020,16491,50660,51287,	16	45	22	25	22	27	45	25	32	33	16	30	38	26	30	42
Isoform 1 of Sarcalumenin precursor,Isoform 2 of Sarcalumenin precursor,	SRL,	IPI00328534,IPI00658052,	ENSP00000333285,	NP_001092284,	Q86TD4-1,Q86TD4-2,	ADLIFVVFDPTK, ADNLATQMLMR, AITQELPGLLGSLGLGK, DFFGINPISSFK, DIVEDPDKFYIFK, DKMTFFSDGELVFK, EAYKDFFGINPISSFK, FGQNFLEK, IHALLVDR, IYHSSIKPLEQSYK, KIYHSSIKPLEQSYK, LDVGLELEMLFR, LIGIEVPHK, MTFFSDGELVFK, QHEITDGEITSKPMVLFLGPWSVGK, STMINYLLGLENTR, TIEGIVMAADSAR, TLMLNEDKPSDDYSAVLQR, VTFVDTPGIIENR, YQLYTGAEPTTSEFTVLMHGPK	857, 932	92784.12,100787.555,	0.269899	4.04946	20	5509,16529,	74	92	87	66	54	35	87	71	73	60	57	72	116	51	60	87
67 kDa protein,Isoform 1 of UPF0317 protein C14orf159, mitochondrial precursor,Isoform 2 of UPF0317 protein C14orf159, mitochondrial precursor,	C14orf159,	IPI00328650,IPI00411520,IPI00784009,	ENSP00000256324,ENSP00000314047,ENSP00000374527,ENSP00000374528,	NP_001095836,NP_001095837,NP_001095838,NP_079228,	Q7Z3D6-1,Q7Z3D6-2,	APGDQAWTQALPSVIK, APGDQAWTQALPSVIKEEK, ELESMIGIDPGNR, EVAIIVDQR, FDHLVAIER, HLVDPIDDLFLAAK, IPEVHHISQDPLHYSIASVSASQK, IPGISSTGVGDGGNELGMGK, IVEDAVEQGVLK, KIPGISSTGVGDGGNELGMGK, SGVSGIVGMEVDGLPFHNTHAEMIQK, WMLPPQGAISETR	616, 621, 618	66436.045,66926.6,66564.175,	0.258763	6.80869	12	5739,	18	16		41	18	23	15					25	26	26	39	12
Mitochondrial 39S ribosomal protein L50,	MRPL50,	IPI00329036,	ENSP00000363999,	NP_061924,	Q8N5N7,	DVLDFYNVPIQDR, FNLLAHLADDLGHVVPNSR, SKFDELSASNLPPNLK	158	18324.765,	0.303797	8.06406	3	5739,30529,	3								2
NADH dehydrogenase [ubiquinone] 1 alpha subcomplex subunit 11,	NDUFA11,	IPI00329301,	ENSP00000311740,	NP_783313,	Q86Y39,	AYSTTSIASVAGLTAAAYR, KAYSTTSIASVAGLTAAAYR, LEGWEVFAK, LEGWEVFAKPK, VTLNPPGTFLEGVAK	141	14851.96,	0.326241	8.89457	5	3954,5739,8137,16020,16021,16491,	25	43	27	50	49	16	25	24	29	27	8	38	28	12	18	16
LYR motif-containing protein 7,	LYRM7,	IPI00329321,	ENSP00000334660,	NP_859056,	Q5U5X0,	IGSDVELLLR, TSVIQGIHTDHNTLK	104	11954.795,	0.240385	10.3825	2	0,		5			5		3		6
Isoform 1 of UTP--glucose-1-phosphate uridylyltransferase,Isoform 2 of UTP--glucose-1-phosphate uridylyltransferase,	UGP2,	IPI00329331,IPI00395676,	ENSP00000338703,	NP_001001521,NP_006750,	Q16851-1,Q16851-2,	GLPDNISSVLNK, GTVIIIANHGDR, IDIPPGAVLENK, IQRPPEDSIQPYEK, NENTFLDLTVQQIEHLNK, SFENSLGINVPR, TTSDLLLVMSNLYSLNAGSLTMSEK	508, 497	56939.825,55676.36,	0.20898	8.24142	7	3983,5515,5737,6011,8152,16740,16779,		2							11	2				5
Protein QIL1,	P117,	IPI00329373,	ENSP00000309561,	NP_991330,	Q5XKP0,	DSWNAGIMTVMSALSVAPSK, GSVAGGAVYLVYDQELLGPSDK, IYFPIR	118	13087.165,	0.40678	9.8061	3	5515,		3			20	5	14	8	6			11	19
60S ribosomal protein L6,	RPL6,	IPI00329389,IPI00790342,	ENSP00000202773,	NP_000961,NP_001019833,	Q02878,	ASITPGTILIILTGR, QLASGLLLVTGPLVLNR	288, 289	32727.745,32871.88,	0.110919	11.2739	2	3677,3735,5622,5840,5842,6412,		3							4	2		5
Protein kinase C and casein kinase substrate in neurons protein 3,Uncharacterized protein PACSIN3,	PACSIN3,	IPI00329572,IPI00783170,	ENSP00000298838,ENSP00000374378,ENSP00000374379,	NP_057307,	Q9UKS6,	ADSAVSQEQLR, AQYEQTLAELHR, AWHAFFTAAER, AYAQQLADWAR, DLHQGIEAASDEEDLR, DMLLTLHQHLDLSSSEK, GAFHRPVLGGFR, LSALHLEVR	425, 424	48531.56,48486.465,	0.233216	6.15237	8	5737,6897,8092,16020,19899,45806,	8	18	21	10	11	6	14	8	12	19	3	13	7	6	19	16
Probable saccharopine dehydrogenase,	SCCPDH,	IPI00329600,	ENSP00000355467,	NP_057086,	Q8NBX0,	AGGVFTPGAAFSK, GPEAGYVATPIAMVQAAMTLLSDASHLPK, GVYIIGSSGFDSIPADLGVIYTR, GYSIPFMGSDVSVVR, LPWAVAGR, NVSNLKPVPLIGPK, SAIYGFGDQSNLR	429	47150.99,	0.268065	9.53426	7	16491,47131,	2	5	6	5	7	3	7	5	3	6		5	6	4	6	3
Isoform 1 of Protein TBRG4,Isoform 2 of Protein TBRG4,	TBRG4,	IPI00329625,IPI00477123,	ENSP00000258770,ENSP00000354992,	NP_004740,NP_112162,NP_954573,	Q969Z0-1,Q969Z0-2,	DFVAPHLAQPTGSQSPPPGSK, LLGSLYALGIPK, LNFHPDQEDQFFSLVHEK, LSHLLSEKPEDK	631, 521	70737.31,58441.97,	0.110381	7.24284	4	4672,5524,5739,6915,					3					2		2	2		2
Protein FAM82B,similar to Protein FAM82B,	FAM82B,LOC642197,	IPI00329696,IPI00738917,	ENSP00000318024,	NP_057117,XP_941447,	Q96DB5,	AEQVDPNFYSK, ESEDAELLWR, LLVYEALEYAK, LYQLLTQYK, MLFATPPSSTYEK, VEEILEQADYLYESGETEK	314, 541	35807.635,59650.73,	0.18371	9.27177	6	5488,	9	11	5		6	3	3	2		5		15	3		16	7
Fumarylacetoacetate hydrolase domain-containing protein 2A,	FAHD2A,	IPI00329742,	ENSP00000233379,	NP_057128,	Q96GK7,	ALAAQLPVLPR, ATDAMAHVAGFTVAHDVSAR, RALAAQLPVLPR, SEVTFLAPVTRPDK, TMTQFLEQGEATLSVAR, VNGEVVQSGNTNQMVFK	314	34596.065,	0.254777	8.37979	6	287,5509,8152,16787,				4			3	3		5		3	3
Annexin A5,	ANXA5,	IPI00329801,	ENSP00000296511,	NP_001145,	P08758,	DLLDDLKSELTGK, GLGTDEESILTLLTSR	320	35936.375,	0.090625	4.66004	2	4859,5509,5515,5544,5622,5737,6916,7165,7596,50819,							3	2				3	3			2
Pre-B-cell leukemia homeobox interacting protein 1,Pre-B-cell leukemia transcription factor-interacting protein 1,	PBXIP1,	IPI00332106,IPI00645060,	ENSP00000311550,ENSP00000357448,ENSP00000357450,	NP_065385,		ALESELQQLR, ELPLSPAFFGEDGIFR, GALQQGEAFQR, LLGSVQQDLER, QEGLTFFGTELAPVR, QQELASLLR, QVLPDPEVLEAVGDR	731, 702	80642.76,77683.555,	0.121473	5.04322	7	3714,5634,5829,7275,16481,30154,	3	2	4	9		4	8	4		5		8	13		7	3
Isoform 1 of DnaJ homolog subfamily C member 11,Isoform 2 of DnaJ homolog subfamily C member 11,Isoform 3 of DnaJ homolog subfamily C member 11,	DNAJC11,	IPI00333016,IPI00465290,IPI00607744,	ENSP00000294401,ENSP00000366800,ENSP00000366817,	NP_060668,	Q9NVH1-1,Q9NVH1-2,Q9NVH1-3,	AGFFGTVVEYGAER, GIRPGLTTVLAR, HSVLGAAVSVGVPQGVSLK, WGIQSAMNTSIVR	507, 559, 523	57196.39,63277.57,59172.76,	0.109685	7.9691	4	6457,31072,		2			2		2	2		3			3			3
Isoform 1 of Fatty aldehyde dehydrogenase,Isoform 2 of Fatty aldehyde dehydrogenase,	ALDH3A2,	IPI00333619,IPI00394758,	ENSP00000176643,ENSP00000345774,	NP_000373,NP_001026976,	P51648-1,P51648-2,	HLTPVTLELGGK, IAFGGETDEATR, NVDEAINFINER, VMQEEIFGPILPIVPVK, YIAPTVLTDVDPK	485, 508	54847.36,57668.885,	0.133002	8.64006	5	4028,4029,4030,5783,5792,6081,6629,7417,7422,8152,8544,16020,16021,16491,		3	3				4			3		2	4	3	3
Glutaredoxin-related protein 5,	GLRX5,	IPI00333763,	ENSP00000328570,	NP_057501,	Q86SX6,	DYAAYNVLDDPELR, LGIHSALLDEK	157	16627.77,	0.159236	6.78403	2	5739,9055,15035,45454,	2		4	3	7		3	3	4		2	7	5	4	2	3
Acyl-coenzyme A thioesterase 1,	ACOT1,	IPI00333838,	ENSP00000311224,	NP_001032238,	Q86TX2,	AATLILEPAGR, GFAVMALAYYNYEDLPK, GITAAVVINGSVANVGGTLR, HLGGHEGTIPSKV	421	46276.96,	0.144893	7.36925	4	38,1676,5737,5829,6629,6637,16290,16787,	5		6	2	8	1	3		7	3		3	3		8	4
Stomatin-like protein 2,	STOML2,	IPI00334190,	ENSP00000348886,	NP_038470,	Q9UJZ1,	AEQINQAAGEASAVLAK, APVPGTPDSLSSGSSR, ASYGVEDPEYAVTQLAQTTMR, DVQGTDASLDEELDR, ILAAALTQHNGDAAASLTVAEQYVSAFSK, ILEPGLNILIPVLDR, NTVVLFVPQQEAWVVER	356	38533.645,	0.365169	7.50265	7	5102,5737,5856,16020,	8	13	8	11	15	6	15	8	8	5	5	10	10	8	6	13
22 kDa protein,High mobility group protein B1,High-mobility group box 1,High-mobility group box 1 variant (Fragment),	HMGB1,	IPI00335132,IPI00419258,IPI00644653,IPI00645948,IPI00854726,	ENSP00000255320,ENSP00000343040,ENSP00000345347,ENSP00000369904,	NP_002119,	P09429,	HPDASVNFSEFSK, IKGEHPGLSIGDVAK	192, 215, 158, 162, 176	22066.245,24893.58,18311.035,18807.655,20164.255,	0.157042	9.36721	2	785,793,3677,5634,6288,6310,6325,6355,6357,6916,7165,17055,										3
13 kDa protein,16 kDa protein,19 kDa protein,Isoform Non-muscle of Myosin light polypeptide 6,Isoform Smooth muscle of Myosin light polypeptide 6,MYL6 protein,Uncharacterized protein MYL6,	MYL6,	IPI00335168,IPI00413922,IPI00744444,IPI00789605,IPI00795576,IPI00796366,IPI00797001,	ENSP00000293422,ENSP00000301540,ENSP00000368883,	NP_066299,NP_524147,	P60660-1,P60660-2,	EGNGTVMGAEIR, VFDKEGNGTVMGAEIR, VLDFEHFLPMLQTVAK	151, 116, 156, 151, 116, 145, 167	16929.99,12969.715,17353.425,16961.07,12938.635,16290.25,18499.46,	0.227571	4.30025	3	5509,7519,8307,16461,30049,30898,		31
Isoform 2 of Synaptophysin-like protein 1,	SYPL1,	IPI00335277,		NP_874384,	Q16563-2,	SGFQINLNPLK, TVTATFGYPFR	241	26411.46,	0.0912863	7.29683	2	0,												2
28 kDa protein,29 kDa protein,Isoform 1 of Troponin T, fast skeletal muscle,Isoform 2 of Troponin T, fast skeletal muscle,Isoform 3 of Troponin T, fast skeletal muscle,Isoform 5 of Troponin T, fast skeletal muscle,Uncharacterized protein TNNT3,troponin T3, skeletal, fast isoform 4,	TNNT3,	IPI00337454,IPI00337455,IPI00477427,IPI00641544,IPI00658138,IPI00747742,IPI00852975,IPI00853392,	ENSP00000278317,ENSP00000344870,ENSP00000370960,ENSP00000370961,ENSP00000370969,ENSP00000370970,ENSP00000370975,ENSP00000371001,	NP_001036246,NP_001036247,NP_006748,	P45378-1,P45378-2,P45378-3,P45378-5,	KPLNIDHLGEDK, KPLNIDHLGEDKLR, QKYDITTLR, RKPLNIDHLGEDK, YDITTLR	269, 245, 258, 261, 244, 260, 250, 238	31824.31,29120.64,30596.025,30963.54,28927.485,30747.185,29735.255,28184.695,	0.0949581	7.98458	5	5515,5523,5861,6942,												26			4
solute carrier family 25 member 24 isoform 1,solute carrier family 25 member 24 isoform 2,	SLC25A24,	IPI00337494,IPI00412742,	ENSP00000264128,ENSP00000359058,	NP_037518,NP_998816,		DYFLFNPVTDIEEIIR, HEGLGAFYK, QLLAGGIAGAVSR	477, 458	53354.08,51353.775,	0.081317	5.90377	3	5488,5509,5739,5743,6810,6839,16020,16021,			2							2
NAD(P) transhydrogenase, mitochondrial precursor,	NNT,	IPI00337541,	ENSP00000264663,ENSP00000343873,ENSP00000370939,	NP_036475,NP_892022,	Q13423,	AAALEQFK, AISPDKDNFYFDVK, APMVNPTLGVHEADLLK, AQYPIADLVK, AVVLAANHFGR, DDFDFGTMGHVIR, EFIEAEMK, EGSVVVDLAAEAGGNFETTKPGELYIHK, EVDILISTALIPGK, EVDILISTALIPGKK, EVLASDLVVK, FFTGQITAAGK, FGIHPVAGR, GITHIGYTDLPSR, ILIVGGGVAGLASAGAAK, KTTVLAMDQVPR, MATQASTLYSNNITK, PMEISGTHTEINLDNAIDMIR, QGFNVVVESGAGEASK, RVALSPAGVQNLVK, SAPLLLPGR, SLANVILGGYGTTSTAGGK, SLGAEPLEVDLK, SLGAEPLEVDLKESGEGQGGYAK, SLGVGYAAVDN…	1086	113894.595,	0.35267	8.21102	30	3957,5739,5746,6099,6118,8750,15992,16020,16021,16491,50661,51287,	120	185	146	220	248	51	162	157	236	107	187	167	297	153	174	119
titin isoform novex-1,titin isoform novex-2,	TTN,	IPI00375498,IPI00375499,	ENSP00000340554,ENSP00000352154,	NP_597676,NP_597681,		Big String	27051, 27118	3006805.47,3014007.985,	0.203585	6.69136	375	4601,4674,4713,5524,5975,6468,6979,	255	510	112	291	308	346	287	512	231	200	193	260	643	479	113	382
Transmembrane protein 65,	TMEM65,	IPI00375577,	ENSP00000297632,	NP_919267,	Q6PI78,	DFIYSLHSTER, KEPMEALNTAQGAR, LEAPPPTPGQLR, LGLSIPDLTPK	240	25542.595,	0.2	9.04619	4	16020,16021,	6	26	10	15	10	8	9	10	22	13	4	9	7		5	8
Iron-sulfur cluster assembly 2 homolog, mitochondrial precursor,Uncharacterized protein ISCA2,	ISCA2,	IPI00376195,IPI00783970,	ENSP00000298818,ENSP00000374336,ENSP00000374338,	NP_919255,	Q86U28,	FSLDTVINPDDR, GAQVDFSQELIR, LLEITEGSEFLR, VVVDSDSLAFVK	154, 154	16476.245,16416.105,	0.311688	4.79249	4	5506,5739,46872,51536,	4	3	7	4	11	2	5	4	8			9	5		3	4
Isoform 1 of 60S ribosomal protein L11,Isoform 2 of 60S ribosomal protein L11,	RPL11,	IPI00376798,IPI00746438,	ENSP00000363676,	NP_000966,	P62913-1,P62913-2,	VLEQLTGQTPVFSK, YDGIILPGK	178, 177	20252.235,20124.1,	0.129579	10.1437	2	3735,5515,5622,5730,5840,5842,6412,6605,19843,									6
BCDO2 protein,CDNA FLJ34464 fis, clone HLUNG2003049, weakly similar to Ambystoma tigrinum RPE65 protein mRNA,Isoform 1 of Beta,beta-carotene 9',10'-dioxygenase,Isoform 2 of Beta,beta-carotene 9',10'-dioxygenase,Isoform 3 of Beta,beta-carotene 9',10'-dioxygenase,Isoform 4 of Beta,beta-carotene 9',10'-dioxygenase,beta-carotene dioxygenase 2 isoform a,	BCDO2,	IPI00377027,IPI00377028,IPI00396358,IPI00412161,IPI00472555,IPI00479961,IPI00550122,	ENSP00000347989,ENSP00000350314,ENSP00000354338,	NP_001032367,NP_114144,	Q9BYV7-1,Q9BYV7-2,Q9BYV7-3,Q9BYV7-4,	NYIIFIEQPLK, TLEVYQLQNLR	550, 539, 579, 506, 545, 556, 351	62279.605,60825.8,65673.67,57336.505,61509.65,62963.455,40116.27,	0.0435578	8.22734	2	5506,5622,16119,16491,16702,42573,42574,				2									2
Isoform 1 of NLR family member X1,Isoform 2 of NLR family member X1,	NLRX1,	IPI00377214,IPI00465264,	ENSP00000292199,	NP_078894,NP_733840,	Q86UT6-1,Q86UT6-2,	ALPLLFNLIK, QFGPTFALDTVHVDPVIR	921, 975	101875.02,107614.82,	0.0295598	7.62252	2	0,				2											3
Prenylcysteine oxidase 1 precursor,	PCYOX1,	IPI00384280,	ENSP00000264441,	NP_057381,	Q9UHG3,	FGLNTVLTTDNSDLFINSIGIVPSVR, FLNEMIAPVMR, IAIIGAGIGGTSAAYYLR, IFSQETLTK, LATMMVQGQEYEAGGSVIHPLNLHMK, LFLSYDYAVK, MYEVVYQIGTETR, SDFYDIVLVATPLNR, SNLISGSVMYIEEK, YQSHDYAFSSVEK	505	56639.66,	0.306931	6.10431	10	1735,5764,16491,16829,30328,		4	2	2			3			3		9	6	4	5	5
carbonic reductase 4,	CBR4,	IPI00384297,	ENSP00000303525,	NP_116172,		EHDVQNTFEELEK, TMIQQQGGSIVNVGSIVGLK, VNFLVNAAGINR, VNVVAPGFVHTDMTK	237	25301.24,	0.253165	9.93139	4	8152,16491,	11	11	11	11	12	6	9	6	15	12	6	6	5	6	7	11
36 kDa protein,Solute carrier family 25 member 42,	SLC25A42,	IPI00384310,IPI00783847,	ENSP00000326693,ENSP00000373516,ENSP00000373517,	NP_848621,	Q86VD7,	LFAGALAGTTAASLTYPLDLVR, MQTAGVTGYPR, QVLSSLLSGALAGALAK	320, 318	35610.995,35408.725,	0.156741	10.4717	3	5488,5739,5743,6810,16020,16021,	7	10			15		10	8	11	5		12	6
Keratin, type I cytoskeletal 14,	KRT14,	IPI00384444,	ENSP00000167586,	NP_000517,	P02533,	ADLEMQIESLKEELAYLK, ADLEMQIESLKEELAYLKK, APSTYGGGLSVSSSR, DAEEWFFTK, EVATNSELVQSGK, GQVGGDVNVEMDAAPGVDLSR, ILTATVDNANVLLQIDNAR, LLEGEDAHLSSSQFSSGSQSSR, MSVEADINGLR, TMQNLEIELQSQLSMK, VVSTHEQVLR	472	51621.115,	0.32839	4.80741	11	5200,5515,8544,45095,	4	7		3	2	7	10	64	34		20	12	77		10	118
Isoform 1 of Nucleotide-binding protein-like,	NUBPL,	IPI00384517,	ENSP00000281081,	NP_079428,	Q8TB37-1,	AIGLLDVDVYGPSVPK, EASDTGQPIVFSQPESDEAK, STTAVNLALALAANDSSK	319	34082.57,	0.169279	9.47514	3	166,5524,								5				3	5			4
Enoyl coenzyme A hydratase domain-containing protein 2,	ECHDC2,	IPI00384676,	ENSP00000360577,			ALAGPDQGITEILMNRPSAR, ALAQEILPQAPIAVR, LSGTEAHVLGLVNHAVAQNEEGDAAYQR, VAASSAVMGLIETTR	292	31125.815,	0.267123	8.85799	4	3824,8152,	4	8	4	4	8		5		4	4					3	4
EARS2 protein,Probable glutamyl-tRNA synthetase, mitochondrial precursor,	EARS2,	IPI00384707,IPI00642156,	ENSP00000343488,	NP_001077083,	Q5JPH6,	FAPSPTGFLHLGGLR, LELYAQATEALLK, TALYNYIFAK	534, 523	59988.355,58688.1,	0.0719094	8.57323	3	166,4818,5524,5737,5739,6424,16874,17101,												3			4
Anti-RhD monoclonal T125 gamma1 heavy chain precursor,Hepatitis B virus receptor binding protein (Fragment),IGHG1 protein,IGHM protein,IGHV4-31 protein,Immunoglobulin heavy variable 4-31,Putative uncharacterized protein DKFZp686C11235,Putative uncharacterized protein DKFZp686G11190,Putative uncharacterized protein DKFZp686H20196,Putative uncharacterized protein DKFZp686I15196,Putative uncharacter…	IGHG1,IGHM,IGHV431,	IPI00384938,IPI00423463,IPI00423464,IPI00423466,IPI00448925,IPI00448938,IPI00472610,IPI00645363,IPI00761159,IPI00784810,IPI00784817,IPI00784822,IPI00784828,IPI00784842,IPI00785084,IPI00807531,IPI00815926,IPI00816314,IPI00816681,IPI00829944,	ENSP00000374990,ENSP00000374991,		P01857,	DTLMISR, FNWYVDGVEVHNAK, GPSVFPLAPSSK, TTPPVLDSDGSFFLYSK, VVSVLTVLHQDWLNGK	482, 480, 475, 481, 544, 469, 478, 472, 480, 470, 475, 473, 473, 475, 476, 475, 470, 466, 348, 469	52851.715,52612.335,52360.06,52758.55,60101.765,51394.79,52666.315,51724.275,52586.085,51203.905,52362.12,51343.69,52120.68,52042.58,52286.045,51986.64,51715.225,50926.435,38161.965,51253.65,	0.140774	8.15037	5	4872,5515,5624,6955,													4		10
Calcium-binding mitochondrial carrier protein Aralar1,	SLC25A12,	IPI00386271,	ENSP00000263812,	NP_003696,	O75746,	DLGIFGLYK, DVEVTKEEFAQSAIR, EEFAQSAIR, FGLYLPK, FKSPSVAVVQPK, FTLGSVAGAVGATAVYPIDLVK, GLIPQLIGVAPEK, GSGSVVGELMYK, HLNYTEFTQFLQELQLEHAR, IADLPPANPDHIGGYR, IAPLAEGALPYNLAELQR, ILREEGPSAFWK, IVQLLAGVADQTK, IYSTLAGTR, KDVEVTKEEFAQSAIR, KIYSTLAGTR, LATATFAGIENK, LLLADENGHVGGLNLLAAGAMAGVPAASLVTPADVIK, LQVAGEITTGPR, LTLADIER, LTVNDFVR, NIFLQYASTEVDGER, NIFLQYASTEVDGERYMTPEDFVQR, PIWLQIAESAYR, QQSPGLGRP…	678	74755.185,	0.59587	8.56073	34	5215,5313,5488,5509,5739,5743,6810,15183,15810,15813,16020,16021,43490,51592,	214	265	282	211	330	84	203	182	275	251	99	305	274	165	317	231
Apolipoprotein O-like precursor,	APOOL,	IPI00394809,	ENSP00000362268,	NP_940852,	Q6UXV4,	HSVPLPTELSSEAK, KQLVKPEQLPIYTAPPLQSK, KVYATSQQIFGAVK, LGSSSEIEVPAK, LMDHGQSHPEDIDMYSTR, MGVITVSGLAGLVSAR, NGIMDTVQFGK, QLVKPEQLPIYTAPPLQSK, SESTSGATQFMPDPK, TKSESTSGATQFMPDPK, VYATSQQIFGAVK, YVEEQPGHLQMGFASIR	268	29158.745,	0.518657	10.0748	12	0,	92	92	86	41	82	59	90	73	113	102	29	84	70	28	93	71
Isoform Heart of ATP synthase gamma chain, mitochondrial precursor,	ATP5C1,	IPI00395769,	ENSP00000338568,	NP_005165,	P36542-2,	ADIKGPEDK, ELIEIISGAAAL, EVMLVGIGDK, EVMLVGIGDKIR, GLCGAIHSSIAK, HLLIGVSSDR, IYGLGSLALYEK, KHLLIGVSSDR, KKHLLIGVSSDR, LTLTFNR, NASEMIDKLTLTFNR, QMKSEVATLTAAGK, SEVATLTAAGK, THSDQFLVAFK	297	32880.58,	0.367003	9.80391	14	0,	188	181	258	174	153	82	144	127	185	150	81	134	138	193	256	110
Isoform A of Branched-chain-amino-acid aminotransferase, mitochondrial precursor,	BCAT2,	IPI00396258,	ENSP00000322991,	NP_001181,	O15382-1,	AADLQLEMTQKPHK, AWVGGVGNYK, KPGPGEPLVFGK, LGGNYGPTVLVQQEALK, LGGNYGPTVLVQQEALKR, LIEVDKDWVPDAAGTSLYVR, LIEVDKDWVPDAAGTSLYVRPVLIGNEPSLGVSQPTR, NLHIPTMENGPELILR, PVLIGNEPSLGVSQPTR, QSLLDMAQTWGEFR	392	44287.445,	0.308673	8.81911	10	4084,5737,5739,8152,9082,9083,16740,	7	6	11	7	12	3	9	15	5	10	5	6	9	5	8	14
Elongation factor 1-alpha,Elongation factor 1-alpha 1,	EEF1A1,	IPI00396485,IPI00472724,	ENSP00000330054,ENSP00000332874,ENSP00000339053,ENSP00000339063,ENSP00000361194,	NP_001393,	P68104,	EHALLAYTLGVK, IGGIGTVPVGR, YYVTIIDAPGHR	462, 462	50140.565,50184.725,	0.0757576	9.54125	3	166,3746,3924,5525,5737,5853,6414,		3
Hornerin,similar to Hornerin,	HRNR,LOC730839,RPTN,	IPI00398625,IPI00787362,	ENSP00000357791,	NP_001009931,XP_001127437,	Q86YZ3,	GHYESGSGQTSGFGQHESGSGQSSGYSK, HGSGSGHSSSYGQHGSGSGWSSSSGR	2850, 1885	282390.185,188045.95,	0.0237973	10.1266	2	5509,5515,7275,31424,									15
Uncharacterized protein C3orf60,	C3orf60,	IPI00399053,	ENSP00000323076,	NP_951032,	Q9BU61,	EAAQAMYIDSYNSR, IEIVVVGTGDR, LQSQVLQAMR, LSPADDELYQR, VTGAALIPPPGGTSLTSLGQAAQ	184	20350.045,	0.375	8.33931	5	5634,	6	6							5	10		8	9		11
Hemoglobin subunit alpha,	HBA1,HBA2,	IPI00410714,	ENSP00000251595,ENSP00000322421,	NP_000508,NP_000549,	P69905,	FLASVSTVLTSK, KVADALTNAVAHVDDMPNALSALSDLHAHK, LRVDPVNFK, MFLSFPTTK, TYFPHFDLSHGSAQVK, VADALTNAVAHVDDMPNALSALSDLHAHK, VGAHAGEYGAEALER, VLSPADKTNVK	142	15257.405,	0.71831	9.08795	8	5344,5506,5515,5833,6810,15671,19825,20037,46872,	66	133	252	259	97	89	119	117	190	112	173	197	377	494	394	204
Isoform 1 of Protein-L-isoaspartate(D-aspartate) O-methyltransferase,Isoform 2 of Protein-L-isoaspartate(D-aspartate) O-methyltransferase,	PCMT1,	IPI00411680,IPI00828189,	ENSP00000356348,ENSP00000356350,ENSP00000356354,	NP_005380,	P22061-1,P22061-2,	ELVDDSINNVR, LILPVGPAGGNQMLEQYDK, LILPVGPAGGNQMLEQYDKLQDGSIK, MGYAEEAPYDAIHVGAAAPVVPQALIDQLKPGGR, MKPLMGVIYVPLTDKEK, SGGASHSELIHNLR, VFEVMLATDR, VQLVVGDGR	227, 228	24650.23,24693.195,	0.531871	6.88026	8	4719,5737,5783,6464,6479,8168,16740,42802,	9	13	7	8	14	5	13	8	9	8	2	12	15	4	5	8
NADH dehydrogenase [ubiquinone] 1 alpha subcomplex subunit 5,Putative uncharacterized protein DKFZp781K1356,	NDUFA5,	IPI00412545,IPI00554681,	ENSP00000347988,ENSP00000368072,	NP_004991,	Q16718,	ILDVLEEIPK, KLEDQLQGGQLEEVILQAEHELNLAR, LEDQLQGGQLEEVILQAEHELNLAR, LWEPLVEEPPADQWK, YTEQITNEK	116, 116	13562.635,13458.605,	0.517241	5.54365	5	3954,5739,5743,5747,6120,8137,16020,		17	16	37	39	18	23	25	30	11	14	31	19	15	15	19
60S ribosomal protein L35,	RPL35,	IPI00412607,	ENSP00000259469,	NP_009140,	P42766,	QLDDLKVELSQLR, VLTVINQTQK	123	14551.37,	0.186992	11.6955	2	3729,3735,5515,5622,5730,5840,5842,6412,		9							8	5		6
Sorting and assembly machinery component 50 homolog,	SAMM50,	IPI00412713,	ENSP00000345445,	NP_056195,	Q9Y512,	DVVVQHVHFDGLGR, ETSYGLSFFK, ETSYGLSFFKPR, FYLGGPTSIR, GMSAEYSFPIWK, LTGSYNTMVGNNEGSMVLGLK, QEILENKDVVVQHVHFDGLGR, SLEPLPSSGPDFGGLGEEAEFVEVEPEAK, SSLSHAMVIDSR, VNQELAGYTGGDVSFIK, VNQELAGYTGGDVSFIKEDFELQLNK, VTFQFSYGTK, VTGQFPWSSLR, WSYGAGIVLR	469	51975.77,	0.371002	6.90067	14	3674,5575,5739,5743,8150,16020,16021,19867,	22	19	28	22	31	7	22	23	19	24		27	25	11	26	23
16 kDa protein,40S ribosomal protein SA,Ribosomal protein SA,	RPSA,	IPI00413108,IPI00553164,IPI00790580,	ENSP00000346067,	NP_001012321,NP_002286,	P08865,	AIVAIENPADVSVISSR, FAAATGATPIAGR, FLAAGTHLGGTNLDFQMEQYIYK, FTPGTFTNQIQAAFR, KSDGIYIINLK, LLVVTDPR, SDGIYIINLK	300, 295, 147	33313.355,32853.79,16115.4,	0.392251	6.16997	7	3735,5622,5634,5737,5840,5843,6412,8305,15935,	5	11	8	2	5	6	10	5	11	9	2	7	5	5	6	4
60S ribosomal protein L17,hypothetical protein LOC645296,hypothetical protein LOC645441,	RPL17,hCG_2004593,hCG_22804,	IPI00413324,IPI00478208,IPI00514874,	ENSP00000347049,	NP_000976,NP_001030178,NP_001087202,NP_001087203,XP_947297,XP_950882,	P18621,	GLDVDSLVIEHIQVNK, YSLDPENPTK	184, 184, 184	21396.925,21312.765,21398.905,	0.141304	10.825	2	3735,5622,5840,6412,15934,		6										4
Hydroxysteroid dehydrogenase-like protein 2,	HSDL2,	IPI00414384,	ENSP00000262542,	NP_115679,		DEQQISAAVEK, DGANIVIAAK, FGGIDILVNNASAISLTNTLDTPTK, FGGIDILVNNASAISLTNTLDTPTKR, GGNVGYGEPSDQADVVMSMTTDDFVK, KFGGIDILVNNASAISLTNTLDTPTK, KVDIIADAAYSIFQKPK, KVESTGAVPEFK, KVESTGAVPEFKEEK, LDLMMNVNTR, LKPTMAFMSGK, LLGTIYTAAEEIEAVGGK, SFTGNFVIDENILK, SGAVEETFR, VAHILNISPPLNLNPVWFK, VDIIADAAYSIFQKPK, VESTGAVPEFKEEK	418	45394.335,	0.447368	8.17594	17	5498,8152,16491,	35	59	32	33	69	33	54	40	40	28	24	44	53	21	25	42
Annexin A2,annexin A2 isoform 1,	ANXA2,	IPI00418169,IPI00455315,	ENSP00000346032,ENSP00000348640,	NP_001002857,NP_001002858,NP_004030,	P07355,	AEDGSVIDYELIDQDAR, DALNIETAIK, DIISDTSGDFR, GVDEVTIVNILTNR, LSLEGDHSTPPSAYGSVK, QDIAFAYQR, RAEDGSVIDYELIDQDAR, SALSGHLETVILGLLK, SLYYYIQQDTK, TDLEKDIISDTSGDFR, TDLEKDIISDTSGDFRK, TNQELQEINR, TPAQYDASELK	357, 339	40410.74,38603.63,	0.385315	8.25048	13	1501,4859,5509,5544,5604,5625,5886,8092,		6		11	5		9	5	5	7		9	5	8	17	6
16 kDa protein,36 kDa protein,Fructose-bisphosphate aldolase C,	ALDOC,	IPI00418262,IPI00789171,IPI00792375,	ENSP00000226253,	NP_005156,	P09972,	GVVPLAGTDGETTTQGLDGLSER, VDKGVVPLAGTDGETTTQGLDGLSER	364, 149, 336	39455.505,16340.5,36294.935,	0.107769	7.63012	2	3824,4332,6096,8152,																4
39S ribosomal protein L14, mitochondrial precursor,	MRPL14,	IPI00418290,	ENSP00000361084,	NP_115487,	Q6P1L8,	FDSNNVVLIEDNGNPVGTR, VGDQILLAIK, VLAIAQNFV, VVDNSALGNSPYHR	145	15947.57,	0.358621	10.9073	4	3735,5622,5739,5840,6412,		3	2									2
Hexaprenyldihydroxybenzoate methyltransferase, mitochondrial precursor,	COQ3,	IPI00418414,	ENSP00000254759,	NP_059117,	Q9NZJ6,	LGASVIGIDPVDENIK, VQEHPASAEFVLK	369	40997.71,	0.0785908	7.49779	2	4395,5739,6071,6744,8152,8171,8425,16740,	8	12	7		10		10	9	10	3			10		9
ASPN protein,	ASPN,	IPI00418431,	ENSP00000364694,	NP_060150,	Q9BXN1,	ISTVELEDFKR, LYLSHNQLSEIPLNLPK	384	43891.095,	0.0729167	6.44055	2	5515,	2														4
Platelet glycoprotein 4,	CD36,	IPI00418495,	ENSP00000308165,	NP_000063,NP_001001547,NP_001001548,	P16671,	EGRPVYISLPHFLYASPDVSEPIDGLNPNEEEHR, PVYISLPHFLYASPDVSEPIDGLNPNEEEHR, QVVLEEGTIAFK, RLQVNLLVKPSEK, SIYAVFESDVNLK, TYLDIEPITGFTLQFAK	472	53052.945,	0.188559	8.05786	6	4872,5515,5624,5887,6629,6631,6810,7155,7596,16020,		3			8		5	4	6	2	2	4	12
Isoform 1 of Import inner membrane translocase subunit TIM50, mitochondrial precursor,Isoform 2 of Import inner membrane translocase subunit TIM50, mitochondrial precursor,	TIMM50,	IPI00418497,IPI00656071,	ENSP00000318115,	NP_001001563,	Q3ZCQ8-1,Q3ZCQ8-2,	AQGPQQQPGSEGPSYAK, IPDEFDNDPILVQQLR, QNLFLGSLTSR, TIALNGVEDVR, TVLEHYALEDDPLAAFK, VLLDLSAFLK	456, 353	50464.155,39645.85,	0.20606	9.18683	6	3723,4722,4725,5515,5739,5744,6470,6605,7006,15031,16020,16021,16607,43021,	7	25	12	7	20	6	23	12	14	19		18	16	8	15	12
Isoform 1 of Synaptophysin-like protein 2,Isoform 2 of Synaptophysin-like protein 2,	SYPL2,	IPI00418582,IPI00477131,	ENSP00000358888,	NP_001035799,	Q5VXT5-1,Q5VXT5-2,	DVSSIIVAFGYPFR, IQYEMPLCDEESSSK, LEEPLGFIK, RLEEPLGFIK	236, 272	25695.255,30156.025,	0.154318	6.53769	4	5215,6810,6874,8021,16020,16021,	31	41	14	12	28	6	19	12	32	43	9	50	36	14	18	16
Isoform 1 of Cytosol aminopeptidase,Isoform 2 of Cytosol aminopeptidase,	LAP3,	IPI00419237,IPI00789806,	ENSP00000226299,ENSP00000371691,ENSP00000371695,	NP_056991,	P28838-1,P28838-2,	EKEDDVPQFTSAGENFDK, GITFDSGGISIK, GVLFASGQNLAR, SWIEEQAMGSFLSVAK, TFYGLHQDFPSVVLVGLGK	519, 488	56165.84,52770.815,	0.153075	7.38586	5	287,4178,5622,5737,5739,6508,8233,8270,16804,19538,30145,			3		5							2		2	3
Peroxisomal 3,2-trans-enoyl-CoA isomerase,	PECI,	IPI00419263,IPI00639841,	ENSP00000354737,ENSP00000369461,ENSP00000369468,	NP_006108,	O75521,	ATEMLIFGK, DFENSMNQVK, KSTGFETLVVTSEDGITK, NAINTEMYHEIMR, PGVFDLINK, QNYVDLVSSLSPSLESSSQVEPGTDR, QNYVDLVSSLSPSLESSSQVEPGTDRK, STGFETLVVTSEDGITK, WDAWNALGSLPK	359, 394	39609.07,43584.755,	0.258194	9.17578	9	62,5488,5739,5777,8152,16853,	9	12	11	15	21	10	29	19	17	15	4	15	16	10	13	14
NADH dehydrogenase (ubiquinone) 1 alpha subcomplex, 6, 14kDa,	NDUFA6,	IPI00419266,	ENSP00000330937,	NP_002481,	P56556,	EVPNTVHQFQLDITVK, FFHETEAPRPK, GKIELEETIK, QATSTASTFVKPIFSR, VVDLLVIK	154	17870.715,	0.396104	10.8208	5	3954,5739,5747,6120,6979,8137,16020,16491,31966,	30	30	27	74	55	15	30	30	56	45	8	31	28	28	32	17
Anti-RhD monoclonal T125 kappa light chain precursor,IGKC protein,IGKV1-5 protein,IGKV2-24 protein,Putative uncharacterized protein,	IGKC,IGKV15,	IPI00419424,IPI00430808,IPI00430820,IPI00430847,IPI00440577,IPI00472961,IPI00478600,IPI00550731,IPI00746963,IPI00761125,IPI00784070,IPI00784661,IPI00784773,IPI00784865,IPI00784985,IPI00807459,IPI00816118,IPI00827488,IPI00853045,	ENSP00000374777,ENSP00000374788,ENSP00000374792,ENSP00000374795,		P01834,P06310,	DSTYSLSSTLTLSK, TVAAPSVFIFPPSDEQLK, VDNALQSGNSQESVTEQDSK	240, 235, 235, 236, 239, 236, 236, 239, 236, 234, 236, 236, 236, 236, 235, 294, 236, 236, 234	26234.265,25645.65,25764.66,25706.715,26245.48,25936.015,25870.875,26234.35,25602.575,25673.675,25740.855,25806.775,25701.705,25772.625,25520.41,32116.895,25923.965,25750.765,25697.565,	0.217913	7.59911	3	5515,5576,6955,							6						18	7	6
Peptidyl-prolyl cis-trans isomerase A,	LOC654188,PPIA,PPIAL3,	IPI00419585,	ENSP00000348240,ENSP00000351238,	NP_066953,XP_931592,XP_945701,	P62937,	FEDENFILK, SIYGEKFEDENFILK, VNPTVFFDIAVDGEPLGR, VSFELFADK, VSFELFADKVPK	165	18012.42,	0.272727	7.96846	5	3755,5634,5737,6457,16853,42277,45069,46790,51082,		3					2		4				3
Isoform 1 of 39S ribosomal protein L55, mitochondrial precursor,Isoform 2 of 39S ribosomal protein L55, mitochondrial precursor,mitochondrial ribosomal protein L55 isoform b,	MRPL55,	IPI00419626,IPI00472663,IPI00640399,	ENSP00000295008,ENSP00000337342,ENSP00000337361,ENSP00000338189,ENSP00000355692,ENSP00000355693,ENSP00000355694,ENSP00000355695,ENSP00000355696,ENSP00000355697,ENSP00000355699,ENSP00000355700,ENSP00000355701,ENSP00000355702,ENSP00000355703,ENSP00000355705,ENSP00000355707,ENSP00000355708,	NP_852106,NP_852119,NP_852120,NP_852121,NP_852127,NP_852128,NP_852129,NP_852130,	Q7Z7F7-1,Q7Z7F7-2,	KEYEQELSDDLHVER, MLAMPIDLDTLSPEER	164, 125, 128	18902.405,14702.67,15128.195,	0.226404	11.5304	2	3735,5739,5762,6412,30529,				3			3		3			3
Isoform 1 of 3-hydroxyisobutyryl-CoA hydrolase, mitochondrial precursor,	HIBCH,	IPI00419802,	ENSP00000352706,	NP_055177,	Q6NVY1-1,	AGIATHFVDSEK, AVLIDKDQSPK, ENIASVLENYHTESK, EVTEEDLNNHFK, FLNALTLNMIR, HTDAAEEVLLEK, IAPVFFR, KWEQDPETFLIIIK, LAMLEEDLLALK, LGYFLALTGFR, SFILEEHMDK, SLGSSDLKF, SPSKENIASVLENYHTESK, TLQEVLTMEYR, WEQDPETFLIIIK	386	43481.935,	0.391192	8.36126	15	3860,5739,8152,9083,16787,	39	54	76	25	55	10	74	46	59	108	20	46	57	16	33	50
Dihydrolipoyllysine-residue succinyltransferase component of 2- oxoglutarate dehydrogenase complex, mitochondrial precursor,	DLST,	IPI00420108,	ENSP00000335304,	NP_001924,	P36957,	AKPAEAPAAAAPK, ASAFALQEQPVVNAVIDDTTK, ASAFALQEQPVVNAVIDDTTKEVVYR, DYIDISVAVATPR, EAVTFLR, GLVVPVIR, LGFMSAFVK, NVEAMNFADIER, TPAFAESVTEGDVR, VEGGTPLFTLR, VEVRPMMYVALTYDHR	453	48639.73,	0.284768	9.19474	11	4149,5515,5739,6091,6099,8415,16740,31405,45252,	91	73	113	78	133	53	104	80	80	59	80	79	75	57	91	74
Isoform 4 of 39S ribosomal protein L43, mitochondrial precursor,	MRPL43,	IPI00428288,	ENSP00000315948,ENSP00000359256,	NP_115488,	Q8N983-4,	EVQDPAPAQVQAQ, FLASVLHNGLGR, LADQSGLDVIR, SVEEISTLVQK, VVAEYLNGAVR	159	17853.13,	0.36478	10.3409	5	0,	8	10	11	10	8	4	9	5	9	12		12	3		14	11
myomesin 1 isoform a,	MYOM1,	IPI00434580,	ENSP00000348821,	NP_003794,		AINQAGVGKPSDLAGPVVAETRPGTK, ATLTFSHLNKEDEGLYTIR, ATNHSTVVLVGDVFK, AVNAAGLSEYSQDSEAIEVK, DADAEIEGAPAAPLDVK, FALFDLAEGK, FPVTGLIEGR, GELSAYASVVVK, HFQPEIQWYR, IALSATDLK, IGGAEITGYYVNYR, KDSLVLQWKPPVHSGR, LNEDHLLHAPEFIIKPR, MGEYYEQYSAYVFVR, MGIGFPSR, NQVPINVHANPGK, QPAVDGGSPILGYFIDK, TAYFTINGVSTADSGK, TPVTGYFVDLK, TVDLSGQAYDEAYAEFQR, VLGGLPDVVTIQEGK, VSEPVAALDPAEK, WVQTLWSGER	1685	187625.14,	0.196439	6.91561	23	6941,8307,30016,	36	50	33	24	36	29	50	42	45	48	11	26	20	32	16	30
ATP synthase subunit alpha, mitochondrial precursor,	ATP5A1,	IPI00440493,	ENSP00000282050,	NP_001001937,NP_004037,	P25705,	AVDSLVPIGR, EAYPGDVFYLHSR, EIVTNFLAGFEA, ELIIGDR, EPMQTGIK, EVAAFAQFGSDLDAATQQLLSR, FENAFLSHVVSQHQALLGTIR, FNDGSDEK, GIRPAINVGLSVSR, GMSLNLEPDNVGVVVFGNDK, GYLDKLEPSK, HALIIYDDLSK, ILGADTSVDLEETGR, ISEQSDAK, ISVREPMQTGIK, ITKFENAFLSHVVSQHQALLGTIR, LELAQYR, LKEIVTNFLAGFEA, LTDADAMK, NVQAEEMVEFSSGLK, PAINVGLSVSR, QGQYSPMAIEEQVAVIYAGVR, QMSLLLR, QVAGTMKLELAQYR, RLTDADAMK, RSTVAQLVK, RTGAIVDVPVGEELLGR…	553	59750.06,	0.625678	9.56074	37	166,5215,5515,5524,5624,5739,5753,6811,15986,15992,16020,16469,16787,16820,45261,46872,46933,46961,	1257	1206	982	1259	1205	656	1030	1107	1517	971	1351	1076	1950	1127	1127	1140
26 kDa protein,L-xylulose reductase,	DCXR,	IPI00448095,IPI00797249,IPI00797917,	ENSP00000303356,	NP_057370,	Q7Z4W1,	ALGSVGPVDLLVNNAAVALLQPFLEVTK, AVIQVSQIVAR, GTVQALHATGAR, TQADLDSLVR, VNAVNPTVVMTSMGQATWSDPHK	244, 242, 242	25912.875,25742.665,25727.645,	0.346159	8.1233	5	5902,5903,5975,5997,6006,6739,8152,16020,16491,42732,50038,	9	9	8	6	14		12	8	7	6	5		6		7
Keratin, type I cytoskeletal 17,	KRT17,	IPI00450768,	ENSP00000319235,	NP_000413,	Q04695,	ADLEMQIENLKEELAYLK, ADLEMQIENLKEELAYLKK, ALEEANTELEVK, ASLEGNLAETENR, DAEDWFFSK, GQVGGEINVEMDAAPGVDLSR, ILTATVDNANILLQIDNAR, LLEGEDAHLTQYK, LSVEADINGLR	432	48105.265,	0.270833	4.67479	9	5200,5515,5882,8544,													20			5
NADH dehydrogenase [ubiquinone] 1 alpha subcomplex subunit 7,	NDUFA7,	IPI00452731,	ENSP00000301457,	NP_004992,	O95182,	ALVSGKPAESSAVAATEK, ALVSGKPAESSAVAATEKK, AVTPAPPIKR, ESVPPSIIMSSQK, KAVTPAPPIK, KAVTPAPPIKR, NWASGHDLQGK, PAESSAVAATEK, PAESSAVAATEKK, RTQPPPKLPVGPSHK, RWELSSDQPYL, WELSSDQPYL	113	12551.27,	0.690265	10.8001	12	3954,5739,5743,5747,6120,8137,16020,16491,42773,	43	71	54	71	57	23	42	27	62	20	8	55	44	58	41	33
Histone H4,	HIST1H4A,HIST1H4B,HIST1H4C,HIST1H4D,HIST1H4E,HIST1H4F,HIST1H4H,HIST1H4I,HIST1H4J,HIST1H4K,HIST1H4L,HIST2H4A,HIST2H4B,HIST4H4,	IPI00453473,	ENSP00000244484,ENSP00000289352,ENSP00000343282,ENSP00000346316,ENSP00000347168,ENSP00000348258,ENSP00000349037,ENSP00000349849,ENSP00000350159,ENSP00000350767,ENSP00000352980,ENSP00000353624,ENSP00000358153,ENSP00000358162,ENSP00000366581,ENSP00000366687,ENSP00000366956,ENSP00000366974,ENSP00000366990,ENSP00000367034,ENSP00000367060,	NP_001029249,NP_003486,NP_003529,NP_003530,NP_003531,NP_003532,NP_003533,NP_003534,NP_003535,NP_003536,NP_003537,NP_003539,NP_068803,NP_778224,	P62805,	DAVTYTEHAK, DNIQGITKPAIR, ISGLIYEETR, KTVTAMDVVYALK, KTVTAMDVVYALKR, TVTAMDVVYALK, TVTAMDVVYALKR, VFLENVIR	103	11367.3,	0.524272	11.9087	8	786,3677,5515,5634,5694,6325,6334,48015,	113	20	234	121	17	25	52	72	33	56	6	44	38	72	104	74
Histone cluster 2, H3, pseudogene 2,		IPI00455457,	ENSP00000358175,			STELLIR, YRPGTVALR	136	15429.955,	0.117647	11.8294	2	786,3677,5634,5694,6334,7001,	33
Isoform 1 of Ubiquinone biosynthesis methyltransferase COQ5, mitochondrial precursor,	COQ5,	IPI00456965,	ENSP00000288532,	NP_115690,	Q5HYK3-1,	AAETHFGFETVSEEEK, AAETHFGFETVSEEEKGGK, AQQNLSWEEIAK, EYQNEEDSLGGSR, FLNYVQSQHQR, KYDVMNDMMSLGIHR, MHPLPGTQLLDVAGGTGDIAFR, NVTHIDQALQEAHR, RFPSQEEFKDMIEDAGFHK, SYQYLVESIR, VTYESLTSGIVAIHSGFK, VTYESLTSGIVAIHSGFKL, VYQVFESVAK, YDVMNDMMSLGIHR	327	37140.17,	0.501529	6.94355	14	5739,6744,8168,16740,	36	40	48	27	60	30	45	38	49	37	8	58	29	9	31	29
Cytochrome c oxidase subunit I,	MTCO1,	IPI00464968,	ENSP00000354499,	AP_000641,NP_536845,	P00395,	AYFTSATMIIAIPTGVK, VFSWLATLHGSNMK	516	57455.425,	0.0600775	6.91132	2	4129,5506,5507,5515,5739,5746,6123,6810,16020,16021,16491,46872,		6	3	7	9			3	5				5
Glycoprotein Ib beta,	GP1BB,	IPI00464990,		NP_000398,	P13224,	LLPYLAEDELR, LSLTDPLVAER	411	43156.95,	0.053528	11.2148	2	4888,5515,5887,7155,7166,16020,30168,													2	5
Isoform 1 of Triosephosphate isomerase,	TPI1,	IPI00465028,	ENSP00000229270,	NP_000356,	P60174-1,	ELASQPDVDGFLVGGASLKPEFVDIINAK, HVFGESDELIGQK, KQSLGELIGTLNAAK, QSLGELIGTLNAAK, SNVSDAVAQSTR, VVLAYEPVWAIGTGK	286	30790.785,	0.293706	5.72051	6	4807,6094,6096,6098,6633,8152,16853,	6	3	7		4	2	3		9	6		7	7		13	6
Isoform alpha-enolase of Alpha-enolase,	ENO1,	IPI00465248,	ENSP00000234590,ENSP00000351745,	NP_001419,	P06733-1,	DATNVGDEGGFAPNILENK, DATNVGDEGGFAPNILENKEGLELLK, FTASAGIQVVGDDLTVTNPK, GNPTVEVDLFTSK, HIADLAGNSEVILPVPAFNVINGGSHAGNK, IGAEVYHNLK, LAMQEFMILPVGAANFR, LMIEMDGTENK, VVIGMDVAASEFFR, YISPDQLADLYK	434	47168.555,	0.352535	7.46046	10	15,122,287,3700,3714,4634,5515,5634,5737,6096,6350,8243,16020,16829,30308,	15	24	18	8	16	20	33	29	25	20	10	23	11	20	9	21
GTP:AMP phosphotransferase mitochondrial,	AK3,	IPI00465256,	ENSP00000371230,	NP_057366,	Q9UIJ7,	AVIMGAPGSGK, AYEDQTKPVLEYYQK, AYQIDTVINLNVPFEVIK, EDDKPETVIKR, GTEIGVLAK, GVLETFSGTETNK, HLSSGDLLR, ITTHFELK, IWPYVYAFLQTK, KGVLETFSGTETNK, LIPDDVMTR, LKAYEDQTKPVLEYYQK, NLTQYSWLLDGFPR, TLPQAEALDR, TVGIDDLTGEPLIQR, TVGIDDLTGEPLIQREDDKPETVIK, VYNIEFNPPK	227	25565.2,	0.735683	9.63533	17	166,4017,5524,5525,5739,6139,16301,16740,46899,	41	110	84	89	166	56	120	32	147	88	39	84	50	64	138	70
Cytochrome c,	CYCS,	IPI00465315,	ENSP00000307786,	NP_061820,	P99999,	ADLIAYLK, ADLIAYLKK, ADLIAYLKKATNE, GIIWGEDTLMEYLENPK, GIIWGEDTLMEYLENPKK, KTGQAPGYSYTAANK, TGPNLHGLFGR, TGQAPGYSYTAANK	105	11748.69,	0.542857	10.1636	8	158,159,5506,5515,5634,5739,5746,5758,5829,6118,6309,6810,6915,8635,20037,45155,45333,46872,	151	172	147	166	274	45	140	130	243	121	35	165	148	105	107	89
60S ribosomal protein L13,	RPL13,	IPI00465361,	ENSP00000307889,	NP_000968,NP_150254,	P26373,	GFSLEELR, LATQLTGPVMPVR, TIGISVDPR	211	24261.26,	0.14218	12.1795	3	3723,3735,5622,5830,6412,		4							3			3		2
Catalase,	CAT,	IPI00465436,	ENSP00000241052,	NP_001743,	P04040,	AFYVNVLNEEQR, DLFNAIATGK, FNTANDDNVTQVR, NAIHTFVQSGSHLAAR, NFTEVHPDYGSHIQALLDK	527	59755.82,	0.132827	7.41288	5	4096,5506,5739,5777,5778,6118,6979,42744,46872,													3		4
Fructose-bisphosphate aldolase A,	ALDOA,	IPI00465439,	ENSP00000336927,	NP_000025,NP_908930,NP_908932,	P04075,	ADDGRPFPQVIK, FSHEEIAMATVTALR, GGVVGIKVDKGVVPLAGTNGETTTQGLDGLSER, GILAADESTGSIAK, GVVPLAGTNGETTTQGLDGLSER, IGEHTPSALAIMENANVLAR, PYQYPALTPEQK, RLQSIGTENTEENRR, VDKGVVPLAGTNGETTTQGLDGLSER	364	39419.675,	0.332418	8.19917	9	4332,6000,6096,6941,8152,16829,	2	6	7	2	5	6	5	3	8	18	3	7		3	12	13
Troponin C, slow skeletal and cardiac muscles,	TNNC1,	IPI00470359,	ENSP00000232975,	NP_003271,	P63316,	GKSEEELSDLFR, NADGYIDLDELK, SEEELSDLFR	161	18402.36,	0.149068	3.78125	3	5509,5861,6937,31013,31014,							3					2
Dihydropyridine receptor alpha 2 subunit,	CACNA2D1,	IPI00470535,	ENSP00000348589,			AKLEETITQAR, EEDPSLLWQVFGSATGLAR, FFGEIDPSLMR, FVVTDGGITR, GYYYEIPSIGAIR, IIMLFTDGGEER, IKPVFIEDANFGR, INTQEYLDVLGRPMVLAGDK, LMNTNLIFIMVESK, NQLILGVMGVDVSLEDIKR, NREEDPSLLWQVFGSATGLAR, PIGVGIPTINLR, RPWYIQGAASPK, SGPGAYESGIMVSK, SQEPVTLDFLDAELENDIK, TASGVNQLVDIYEK, VLLDAGFTNELVQNYWSK	1110	125306.865,	0.20991	4.98541	17	4872,16020,	4	3	13	6	7		9	5	5	11		20	27	7	18	14
RING finger protein C1orf166,	C1orf166,	IPI00470595,	ENSP00000264198,	NP_078820,	Q969V5,	TNTVPFDLVPHEDGVDVAVR, VGATLTGVGELVLDNNSVR, VLKPLDSVDLGLETVYEK	352	39799.695,	0.161932	8.20438	3	4871,5515,5739,8270,16020,16021,43123,46872,		4					3					4
Isoform 1 of Ubiquinone biosynthesis protein COQ9, mitochondrial precursor,Uncharacterized protein COQ9,	COQ9,	IPI00470631,IPI00746245,	ENSP00000262507,ENSP00000369041,	NP_064708,	O75208-1,	AMLAAIYNTTELVMMQDSSPDFEDTWR, ILTAALEFVPAHGWTAEAIAEGAQSLGLSSAAASMFGK, KTDQFLR, LVQLGQAEK, MLIPYIEHWPR, STGEALVQGLMGAAVTLK, YTDQGGEEEEDYESEEQLQHR	318, 324	35508.705,35968.055,	0.408135	5.59899	7	5739,6744,	54	69	75	49	88	35	60	43	70	49	30	66	55	45	87	56
NADH-cytochrome b5 reductase 1,	CYB5R1,	IPI00470674,	ENSP00000356218,	NP_057327,	Q9UHQ9,	DIILREDLEELQAR, EDLEELQAR, FALPTAHHTLGLPVGK, GFVTADMIR, GHFNIQPNKK, GPSGLLTYTGK, IDGSLVIR, IDGSLVIRPYTPVTSDEDQGYVDLVIK, KLGMIAGGTGITPMLQLIR, LGMIAGGTGITPMLQLIR, LWFTLDHPPK, MSQYLDSLK, PYTPVTSDEDQGYVDLVIK, RPQVTLLDPNEK, VGDVVEFR, VPEDPTQCFLLFANQTEK	305	34094.57,	0.534426	9.82386	16	4128,6118,16020,16021,16126,16491,50660,51287,	163	182	205	107	157	202	185	198	152	175	46	227	162	145	195	148
Isoform 2 of NADH dehydrogenase [ubiquinone] 1 beta subcomplex subunit 11, mitochondrial precursor,Neuronal protein,	NDUFB11,	IPI00472058,IPI00478450,	ENSP00000276062,ENSP00000367042,	NP_061929,	Q9NX14-1,Q9NX14-2,	NPDSHGYDKDPVLDVWNMR, RPPEPTTPWQEDPEPEDENLYEK, TVVAPSAVAGK	158, 163	17942.185,18363.62,	0.330298	4.97427	3	3954,5739,8137,16020,16021,16491,	14	26	4	3	17		15		30	12	5	9	10
60 kDa heat shock protein, mitochondrial precursor,61 kDa protein,	HSPD1,	IPI00472102,IPI00784154,	ENSP00000340019,ENSP00000373618,ENSP00000373619,ENSP00000373620,	NP_002147,NP_955472,	P10809,	ALMLQGVDLLADAVAVTMGPK, DMAIATGGAVFGEEGLTLNLEDVQPHDLGK, EIGNIISDAMK, GANPVEIR, GVMLAVDAVIAELK, GVMLAVDAVIAELKK, GYISPYFINTSK, IGIEIIKR, IMQSSSEVGYDAMAGDFVNMVEK, IQEIIEQLDVTTSEYEK, IQEIIEQLDVTTSEYEKEK, ISSIQSIVPALEIANAHR, KISSIQSIVPALEIANAHR, KPLVIIAEDVDGEALSTLVLNR, LSDGVAVLK, LVQDVANNTNEEAGDGTTTATVLAR, NAGVEGSLIVEK, NQLKDMAIATGGAVFGEEGLTLNLEDVQPHDLGK, QSKPVTTPEEIAQVATISANGDK, QSKPVTTPEEIAQVATISANG…	575, 573	61212.32,61054.17,	0.618469	5.54779	32	166,5524,5737,5739,6457,6986,30150,42981,51082,51087,	68	104	63	104	110	46	108	90	93	76	41	96	135	67	71	74
Hemoglobin subunit delta,	HBB,HBD,	IPI00473011,	ENSP00000369654,	NP_000510,	P02042,	EFTPQMQAAYQK, FFESFGDLSSPDAVMGNPK, KVLGAFSDGLAHLDNLK, LHVDPENFR, LLVVYPWTQR, TAVNALWGK, VHLTPEEK, VLGAFSDGLAHLDNLK, VNVDAVGGEALGR, VVAGVANALAHK, VVAGVANALAHKYH	147	16055.41,	0.755102	8.2608	11	5344,5506,5739,5833,6810,15671,19825,20037,30097,46872,	44	119	291	366	68	60	78	64	131	73	117	141	212	629	399	109
IGHM protein,	IGHM,	IPI00477090,IPI00479708,IPI00549291,IPI00828205,IPI00829729,IPI00829768,IPI00829843,IPI00829854,IPI00829911,	ENSP00000375000,ENSP00000375001,		P01871,P20769,	GVALHRPDVYLLPPAR, QVGSGVTTDQVQAEAK, VFAIPPSFASIFLTK, YAATSQVLLPSK	613, 625, 606, 597, 595, 620, 597, 597, 597	67295.44,68610.11,66184.075,65038.68,65290.37,68124.585,65304.35,65300.4,65274.32,	0.0975154	7.34654	4	187,3823,4888,5515,5624,6955,9897,16064,19815,19882,30890,42571,45022,45807,48471,50731,50853,													4
Citrate lyase subunit beta-like protein, mitochondrial precursor,	CLYBL,	IPI00477957,	ENSP00000316738,ENSP00000342991,ENSP00000365538,	NP_996531,	Q8N0X4,	ETLDILYAR, GAFTFQGSMIDMPLLK, KLEQPMNLIPFVETAMGLLNFK, QAQNTVTLATSIK, QVIHPNQIAVVQEQFSPSPEK, TLEDIDLGPTEK, VESPEEIQWFADK, VLPSSLMLPK, VNSVSSGLAEEDLETLLQSR	340	37359.015,	0.4	9.11615	9	287,5739,6725,8815,9346,16830,		9	6	12	10		6	9	4	12		3	5	4	6	5
Uncharacterized protein MYOM3,	MYOM3,	IPI00478774,	ENSP00000332670,ENSP00000363557,	NP_689585,		APLTYSLEK, ASELVVMGDHDAAR, DAEAENPGAPGSPLNVR, EAYVVLAWEEPSPR, EQSTYVLVR, FAVLDLEK, GLPDVATIMEDK, GLVEVIIQNLSEEDKGSYTAQLQDGK, GNPITAYTIER, GPPATLPPPAQVQAFR, GTEVTITIEK, IGALSATPLK, ITNNYGLLSLEIR, KTEIPFDLGNK, KVGTSEWQTVNNKPIQGTR, LISGWNIDILER, LSPAAELHLIFNNK, NDQPVTFLDR, NEMVIGWKPPK, QLSTDLSGQAFEDAMAEHQR, QTSAVELEER, RKTEIPFDLGNK, STFGPSVEFTSVLKPVFAR, SVIGSGTWEAISSESPVR, SVSEAGVGESSAATEPIR, TEIAFL…	1441	162504.12,	0.248439	6.11888	28	5509,	47	73	35	12	41	41	56	48	50	61	12	24	17	22	3	28
Myelin protein zero,myelin protein zero,	MPZ,	IPI00478921,IPI00844448,	ENSP00000337777,ENSP00000353634,ENSP00000356955,	NP_000521,	P25189,	DAISIFHYAK, GQPYIDEVGTFK	258, 251	28530.735,27949.97,	0.0864604	10.1046	2	3674,5575,5886,5887,7638,8366,16020,			6							6
aldehyde dehydrogenase 9A1,	ALDH9A1,	IPI00479877,	ENSP00000271359,ENSP00000346827,	NP_000687,	P49189,	ANDTTFGLAAGVFTR, EILDKFTEEVVK, GIKPVTLELGGK, IGDPLLEDTR, VSFTGSVPTGMK, VTIEYYSQLK	518	56291.485,	0.137066	6.50787	6	4029,5737,5829,6081,6118,8152,9437,16491,19145,42136,42445,47105,	9	6	6	5	5	5	5	6	4	4		7	6	6	6	6
NADH dehydrogenase [ubiquinone] 1 beta subcomplex subunit 10,	NDUFB10,	IPI00479905,	ENSP00000268668,	NP_004539,	O96000,	AFDLIVDRPVTLVR, DYKVDQEIINIMQDR, EVEQFTQVAK, PDSWDKDVYPEPPR, PDSWDKDVYPEPPRR, RDYKVDQEIINIMQDR, RTPVQPNPIVYMMK, TPVQPNPIVYMMK, VDQEIINIMQDR, YQDLGAYSSAR	172	20776.545,	0.459302	8.65416	10	3954,5515,5739,5743,5747,6120,8137,16020,16491,	192	163	220	212	195	66	96	114	149	228	47	145	66	89	187	105
mitochondrial ribosomal protein L1 precursor,	MRPL1,	IPI00549381,	ENSP00000338456,	NP_064621,	Q9BYD6,	FQILDFTSPK, HRPLNLGPFVVR, IAEENGAAFAGGTSLIQK, KFQILDFTSPK, NVEPFTSVLSLPYPFASEINK, VAVFTENASEVK, VDEERENFLQTK	325	36908.35,	0.264615	9.17831	7	3723,3735,5622,5739,5762,5840,6412,15934,		3	7	3	4		3	3	3	3		3	2		9	3
Nitrilase family member 2,	NIT2,	IPI00549467,	ENSP00000265259,	NP_064587,		AVDNQVYVATASPAR, FAELAQIYAQR, LALIQLQISSIK	276	30607.645,	0.137681	7.26639	3	3674,5575,6807,8150,16810,		2			3		4		2	2		4	2
28 kDa protein,dehydrogenase/reductase (SDR family) member 7B,	DHRS7B,	IPI00550165,IPI00790347,	ENSP00000320352,	NP_056325,		GTIMDTTVDVDKR, SPVEVAQDVLAAVGK, VMETNYFGPVALTK	325, 259	35118.68,27949.57,	0.145697	10.1483	3	8152,16491,		4				5			4	7					2
Isoform 1 of Fumarylacetoacetate hydrolase domain-containing protein 1,	FAHD1,	IPI00552360,	ENSP00000314622,	NP_112485,	Q6P587-1,	ENDEIEAGIHGLVSMTFK, GVGPVKENDEIEAGIHGLVSMTFK, IITLEEGDIILTGTPK, NLHHELELGVVMGK, QEGETSSMIFSIPYIISYVSK, SAVLSEPVLFLK, SAVLSEPVLFLKPSTAYAPEGSPILMPAYTR	224	24842.735,	0.473214	7.45678	7	0,	9	12	5	9	14	4	10	5	9	12		13	13	7	7	7
Growth arrest and DNA-damage-inducible proteins-interacting protein 1,	GADD45GIP1,	IPI00552587,	ENSP00000323065,	NP_443082,	Q8TAE8,	AAALAAAVAQDPAASGAPSS, LQAEAQELLGYQVDPR	222	25383.605,	0.162162	10.6427	2	7049,												3
Alpha 1-antitrypsin,Alpha-1-antitrypsin precursor,	SERPINA1,	IPI00553177,IPI00790784,	ENSP00000348068,	NP_000286,NP_001002235,NP_001002236,	P01009,	LQHLENELTHDIITK, VFSNGADLSGVTEEAPLK	418, 359	46736.195,40262.51,	0.0854347	5.22593	2	4867,5515,5576,5615,6953,											2		3
Isoform 2 of Mitochondrial inner membrane protein,	IMMT,	IPI00554469,		NP_001093640,	Q16891-2,	AVDEAADALLK, ELDSITPEVLPGWK, EVAGAKPHITAAEGK, GIEQAVQSHAVAEEEAR, GMSVSDLADK, GMSVSDLADKLSTDDLNSLIAHAHR, GVYSEETLR, IAGAGLLFVGGGIGGTILYAK, KAHQLWLSVEALK, KAVDEAADALLK, LFEMVLGPAAYNVPLPK, LHNMIVDLDNVVK, LHNMIVDLDNVVKK, LSEQELQFR, LSQEQVDNFTLDINTAYAR, LSTDDLNSLIAHAHR, QIVEILTAYASAVGIGTTQVQPE, QKGDTPASATAGDTLSVPAPAVQPEESLK, QTASVTLQAIAAQNAAVQAVNAHSNILK, SEFEQNLSEK, TDHPEIGEGKPTPALSEEASSSSIR, TIPYSDKL…	747	82623.94,	0.480589	6.52856	26	0,	121	106	109	95	190	51	113	103	127	70	50	147	165	64	143	144
Hemoglobin gamma-G (Fragment),Hemoglobin subunit gamma-2,	HBE1,HBG1,HBG2,	IPI00554676,IPI00816618,	ENSP00000338082,ENSP00000369609,	NP_000175,	P69892,	EFTPEVQASWQK, FFDSFGNLSSASAIMGNPK, KVLTSLGDAIK, MVTGVASALSSR, VLTSLGDAIK, VNVEDAGGETLGR	147, 152	16126.35,16593.815,	0.448286	7.06275	6	5344,5506,5833,6810,15671,19825,20037,46872,													10
Ubiquinol-cytochrome c reductase complex 7.2 kDa protein,	UCRC,	IPI00554701,		NP_037519,	Q9UDW1,	AFDQGADAIYDHINEGK, LYSLLFR	63	7308.42,	0.380952	9.96487	2	5739,5740,5746,6122,6810,8121,16020,16491,	15	14	64	61	87	9	49	80	20	10	12	76	27	50	45	80
23 kDa protein,glutathione transferase zeta 1 isoform 1,	GSTZ1,	IPI00556579,IPI00789610,	ENSP00000216465,	NP_665877,		DFQALNPMK, FKVDLTPYPTISSINK, FKVDLTPYPTISSINKR, GIDYETVPINLIK, MISDLIAGGIQPLQNLSVLK, VDLTPYPTISSINK	216, 202	24113.815,22610.065,	0.282614	7.83009	6	3824,5737,9072,	8	13	5	4	9	10	16	9	13	15	4	14	5	4	12	10
NME1-NME2 protein,Nucleoside diphosphate kinase,	NME1,NME1NME2,NME2,	IPI00604590,IPI00795292,	ENSP00000365572,	NP_001018146,		DRPFFPGLVK, TFIAIKPDGVQR, VMLGETNPADSKPGTIR	292, 267	32641.795,30136.92,	0.139815	9.02433	3	166,4550,5524,6183,6228,6241,16301,16740,		4					3		2	4
NADH-ubiquinone oxidoreductase 75 kDa subunit, mitochondrial precursor,	NDUFS1,	IPI00604664,	ENSP00000233190,	NP_004997,	P28331,	ALSEIAGMTLPYDTLDQVR, AVEDKNIGPLVK, DFYMTDSISR, DVAAIAGGLVDAEALVALK, FASEIAGVDDLGTTGR, FAYDGLK, FAYDGLKR, FEAPLFNAR, GLLTYTSWEDALSR, GNDMQVGTYIEK, GWNILTNSEK, IASQVAALDLGYKPGVEAIR, IASQVAALDLGYKPGVEAIRK, ILQDIASGSHPFSQVLK, KPMVVLGSSALQR, KTESIDVMDAVGSNIVVSTR, LEEVSPNLVR, LVNQQLLADPLVPPQLTIK, MHEDINEEWISDK, MTSGVTGDWK, NDGAAILAAVSSIAQK, NRLEEVSPNLVR, TESIDVMDAVGSNIVVSTR, VAGMLQSFQGK, VALIGSPVDLTYTY…	727	79466.77,	0.449794	6.11184	28	3954,5506,5515,5739,5747,5758,6120,6800,6915,8137,16020,42773,45333,46034,46872,51537,51539,51881,	159	149	146	206	209	70	139	165	152	109	128	122	199	117	145	175
Isoform 2 of UPF0105 protein C14orf124,	C14orf124,	IPI00643286,		NP_064580,	Q9NRG7-2,	AFIPLPSAVVQAVFGR, AIMLLEGQK, GGGAMGHMLLPFR, LETTQLLAK, RAFIPLPSAVVQAVFGR, TLATGYQYSFPELGAALK, VLVGGGTGFIGTALTQLLNAR	293	31076.46,	0.296928	9.4368	7	0,	8	15	16	13	16	11	21	10	22	10	11	18	17	4		11
20 kDa protein,Isoform 1 of CDP-diacylglycerol--inositol 3-phosphatidyltransferase,	CDIPT,	IPI00645518,IPI00647250,	ENSP00000219789,	NP_006310,	O14735-1,	MIDLSGNPVLR, SLISVIHLITAAR	213, 185	23538.47,20245.59,	0.121203	8.2568	2	5783,8654,16020,16021,16740,16780,30145,										3
20 kDa protein,	COQ7,	IPI00645720,				FNELMVTFR, KFNELMVTFR	179	20158.07,	0.0558659	5.88254	2	6744,16491,19538,46914,	7
Isovaleryl-CoA dehydrogenase, mitochondrial precursor,	IVD,	IPI00645805,IPI00789848,	ENSP00000249760,	NP_002216,	P26440,	AHSLLPVDDAINGLSEEQR, FLQEHLAPK, FWITNGPDADVLIVYAK, GVYVLMSGLDLER, IGHFQLMQGK, IPAANILGHENK, LISGEYIGALAMSEPNAGSDVVSMK, LVLAGGPLGLMQAVLDHTIPYLHVR, LYEIGAGTSEVR	423, 426	46319.05,46650.435,	0.334515	8.22712	9	3995,5739,5759,6118,8152,50660,	4	10	11	5	10	6	12	9	11	2	3	8	9	5	11	14
peptidylprolyl isomerase B precursor,	PPIB,	IPI00646304,	ENSP00000300026,	NP_000933,	P23284,	DTNGSQFFITTVK, IEVEKPFAIAK, IEVEKPFAIAKE, TVDNFVALATGEK, VIFGLFGK, VIKDFMIQGGDFTR	216	23742.405,	0.277778	10.0714	6	3755,5783,5788,6457,16853,42277,51082,	6	7	10	4	3		6		6	9		4	7	7	12	5
Isoform 1 of ARMET-like protein 1 precursor,	ARMETL1,	IPI00646351,	ENSP00000367702,	NP_001025125,	Q49AH0-1,	GVNFSLDTIEK, TDYVNLIQELAPK, TLDLASVDLR	187	20964.25,	0.181818	7.61919	3	0,		6		2	2	3	7	4	3	4	3	4	4		3	5
Hemoglobin subunit beta,	HBB,	IPI00654755,	ENSP00000333994,ENSP00000369671,	NP_000509,	P68871,	EFTPPVQAAYQK, FFESFGDLSTPDAVMGNPK, GTFATLSELHCDK, SAVTALWGK, VNVDEVGGEALGR	147	15998.34,	0.44898	7.323	5	5344,5506,5833,8217,8430,15671,19825,20037,30185,30492,45429,46872,50880,	58	111	202	294	82	71	116	84	104	103	149	162	232	567	289	145
80 kDa protein,Propionyl-CoA carboxylase alpha chain, mitochondrial precursor,propionyl-Coenzyme A carboxylase, alpha polypeptide precursor,	PCCA,	IPI00744115,IPI00749503,IPI00796978,	ENSP00000308554,ENSP00000365462,ENSP00000365463,	NP_000273,	P05165,	FLSDVYPDGFK, LSSQEAASSFGDDR	728, 703, 730	80058.295,77353.12,80272.515,	0.0347164	7.33949	2	5524,5739,6631,8152,9374,16874,					2		2
28S ribosomal protein S17, mitochondrial precursor,	MRPS17,	IPI00744772,	ENSP00000285298,	NP_057053,	Q9Y2R5,	HELAEIVFK, LVLDPYLLK, NLEELNISSAQ	225	25720.31,	0.128889	5.96772	3	3735,5488,5622,5739,5763,5840,6412,6810,16020,19843,	6	5		5	4		2	3	5	5		5			2	3
Isoform 1 of Serum albumin precursor,	ALB,	IPI00745872,	ENSP00000295897,	NP_000468,	P02768-1,	AVMDDFAAFVEK, DVFLGMFLYEYAR, FKDLGEENFK, FQNALLVR, HPYFYAPELLFFAK, KQTALVELVK, KVPQVSTPTLVEVSR, LVAASQAALGL, LVNEVTEFAK, PLVEEPQNLIK, QTALVELVK, RHPDYSVVLLLR, RHPYFYAPELLFFAK, VFDEFKPLVEEPQNLIK, VPQVSTPTLVEVSR, YLYEIAR	609	69365.94,	0.229885	6.2144	16	3677,5504,5507,5515,5576,5615,6810,8144,9267,15643,16209,19825,19836,30170,43066,43072,43234,46872,51659,	66	75	112	59	79	50	113	55	69	78	68	99	102	65	119	53
54 kDa protein,Sulfite oxidase, mitochondrial precursor,	SUOX,	IPI00745906,IPI00853137,	ENSP00000266971,ENSP00000348440,	NP_000447,NP_001027558,NP_001027559,	P51687,	DGETVESGEVTIK, LHVVGAPGGQSLSLSLDDLHNFPR, NHLPVPNLDPDTYR, VAPTVETSDPYADDPVR, VNSQRPFNAEPPPELLTENYITPNPIFFTR	545, 488	60282.59,53884.255,	0.190318	5.67331	5	5739,6118,9087,16491,20037,30151,		4	4		3							5			5	2
Isobutyryl-CoA dehydrogenase, mitochondrial precursor,	ACAD8,	IPI00747159,	ENSP00000281182,	NP_055199,	Q9UKU7,	AAQLGFGGVYIQTDVGGSGLSR, ELFPVDVMR, IGSEGQGFLIAVR, KAAQLGFGGVYIQTDVGGSGLSR, QFGEPLASNQYLQFTLADMATR, VAFDFAAR, VHQILEGSNEVMR	415	45069.39,	0.212048	7.90691	7	3995,5739,6118,6350,6355,6629,8152,9083,50660,	4	5	5	5	8	3	6	4	6	8		6	8	3	11	5
Conserved hypothetical protein,	C6orf203,	IPI00747200,	ENSP00000310951,	NP_057571,	Q9P0P8,	VGDTLDLLIGEDK, VGDTLDLLIGEDKEAGTETVMR	245	28456.69,	0.0897959	9.83571	2	0,	2	2			2		2		6	2		4	2
Isoform 1 of Sodium/potassium-transporting ATPase subunit beta-1,Uncharacterized protein ATP1B1,	ATP1B1,	IPI00747849,IPI00844210,	ENSP00000356787,ENSP00000356789,ENSP00000356790,	NP_001001787,NP_001668,	P05026-1,P05026-2,	AYGENIGYSEKDR, SYEAYVLNIVR, VAPPGLTQIPQIQK	305, 303	35245.3,35061.07,	0.125001	8.73398	3	5391,5890,6811,6813,6814,16020,16021,30955,31402,	6	5	13	3	3		6	5	4			3	4	3	3	4
55 kDa protein,	PMPCB,	IPI00749487,	ENSP00000368571,			AVEILADIIQNSTLGEAEIER, DLVDYITTHYK, SPAIAAVGPIK, STQAATQVVLNVPETR	491	54523.74,	0.120163	6.82133	4	4222,6508,8270,			3									2
succinate-CoA ligase, GDP-forming, alpha subunit,	SUCLG1,	IPI00759493,	ENSP00000295783,	NP_003840,	P53597,	EKISALQSAGVVVSMSPAQLGTTIYK, GGQTHLGLPVFNTVK, IGIMPGHIHK, IGIMPGHIHKK, ISALQSAGVVVSMSPAQLGTTIYK, ISALQSAGVVVSMSPAQLGTTIYKEFEK, MGHAGAIIAGGK, PVVSFIAGLTAPPGR, QGTFHSQQALEYGTK, QHNSGPNSKPVVSFIAGLTAPPGR, QHNSGPNSKPVVSFIAGLTAPPGRR, RMGHAGAIIAGGK	346	36249.505,	0.312139	9.04363	12	166,4776,5525,5739,5743,6099,8152,16874,	88	114	111	84	146	47	103	105	115	70	31	110	102	60	93	98
LYR motif containing 5,	LYRM5,	IPI00760602,	ENSP00000370761,	NP_001001660,	Q6IPR1,	ELEALYFLR, ELIAQGEFVMK	90	10863.755,	0.222222	10.4908	2	0,					5							7
Leucine-rich PPR motif-containing protein, mitochondrial precursor,	LRPPRC,	IPI00783271,	ENSP00000374134,	NP_573566,	P42704,	AGYPQYVSEILEK, DAGIEPGPDTYLALLNAYAEK, DTTALSFFHMLNGAALR, EQNIVFNAETYSNLIK, GAYDIFLNAK, GDVENIEVVQK, GFTLNDAANSR, GPTEAVGYFLYNLIDSMSDSEVQAK, KVIEEQLEPAVEK, LGAVYDVSHYNALLK, MLNGLEDSIGLSK, MVFINNIALAQIK, NLLESYHVPELIK, NNNIDAAIENIENMLTSENK, NVQGIIEILK, SEAANGNLDFVLSFLK, SGGLGGSHALLLLR, SNTLPISLQSIR, SSLLLGFR, TVLDQQQTPSR, TVQLTSSELESTLETLK, VIEEQLEPAVEK, VIEPQYFGLAYLFR, VIQALAMKGDVENIEVVQK, YAGEPVP…	1394	157903.445,	0.25825	5.99725	26	3697,3723,5515,5634,5737,5739,	14	8	13	27	63		5	7	8	4		24	37	8	19	14
Isoform 1 of Methylcrotonoyl-CoA carboxylase beta chain, mitochondrial precursor,Isoform 2 of Methylcrotonoyl-CoA carboxylase beta chain, mitochondrial precursor,	MCCC2,	IPI00784044,IPI00789428,		NP_071415,	Q9HCC0-1,Q9HCC0-2,	ISVMGGEQAANVLATITK, QFSSADEAALKEPIIK	563, 525	61332.65,57518.15,	0.0625763	7.7664	2	4485,5739,6552,16874,				3										2
Talin-1,	TLN1,	IPI00784273,	ENSP00000367434,ENSP00000373365,ENSP00000373366,	NP_006280,	Q9Y490,	GSQAQPDSPSAQLALIAASQSFLQPGGK, GVAALTSDPAVQAIVLDTASDVLDK, ILAQATSDLVNAIK, TLAESALQLLYTAK	2541	269764.46,	0.0318772	5.93726	4	1726,3779,5200,5515,5737,5856,5911,5925,6928,7016,7043,17166,30274,													5
Mitochondrial 18 kDa protein,	MTP18,	IPI00784376,	ENSP00000266263,	NP_057582,	Q9UDX5,	SVDFLLDSSLR, YLGYANEVGEAFR	166	18009.545,	0.144578	9.62703	2	4089,5739,6915,8270,15976,	3	3			4			3	4
similar to ATP synthase alpha chain, mitochondrial precursor,	LOC642727,	IPI00787366,		XP_001126301,XP_001128469,		VVSQHQALLGTIR, YLDKLEPSK	73	8253.57,	0.30137	9.02889	2	15986,16469,46933,46961,	2						3		2
Isoform 1 of Phosphoglycerate mutase family member 5 precursor,	PGAM5,	IPI00788907,			Q96HS1-1,	AIETTDIISR, TLGDTGFMPPDK	289	32004.11,	0.0761246	8.88757	2	5737,							4			2					4	2
53 kDa protein,flotillin 2,	FLOT2,	IPI00789008,IPI00795979,	ENSP00000333941,	NP_004466,	Q14254,	MGIEILSFTIK, NVVLQTLEGHLR, SILGTLTVEQIYQDR	428, 483	47063.785,53136.96,	0.08373	4.89864	3	5886,7155,8544,9986,16021,16600,45121,		2											2
JUP protein,	JUP,	IPI00789324,				ALMGSPQLVAAVVR, LNTIPLFVQLLYSSVENIQR, LNYGIPAIVK, SAIVHLINYQDDAELATR, TLVTQNSGVEALIHAILR, VSVELTNSLFK	745	81725.94,	0.122148	6.0482	6	5488,		5							3				4			2
165 kDa protein,		IPI00793379,				ADFDDTATYSAVATNAHGQVSTNAAVVVR, AEWYRDDVLLK, APVYSGSSPVSGYFVDFR, AVNANGVGKPSDTSEPVLVEAR, AVNAVGMSENSQESDVIK, DDEGLYTLR, DYVIVTWKPPNTTTESPVMGYFVDR, FKIETVGDHSK, FLSELAHLEEDVHLAR, FSGGSPILGYYLDK, FSGGSPILGYYLDKR, FVVHGLTTGEQYIFR, FWLQAEHLSPDASYR, GGVSDHSAFLFVR, GQDVSILEIAGK, HGLSEPSEITSPIQAQDVTVVPSAPGR, IAAVNLAGIGEPSDPSEHFK, IESNYGVHTLEINR, IPDMAPPQQAK, IPDMAPPQQAKPK, LIGGLPDVVTIMEGK, LMALSNEIK, LMA…	1463	164638.76,	0.363636	6.05467	38	0,	47	69	56	29	37	50	68	80	63	57	23	50	29	50	18	57
alcohol dehydrogenase, iron containing, 1,	ADHFE1,	IPI00852925,		NP_653251,		AANLYASSPHSDFLDYVSAPIGK, AIKPTLGLIDPLHTLHMPAR, GKPVSVPLKPLIAVPTTSGTGSETTGVAIFDYEHLK, IQDAGLVLADTLR, PAYQGSNPISDIWAIHALR, TTDYAFEMAVSNIR, VEPTDSSFMEAIEFAQK	467	50307.42,	0.304069	7.83901	7	8152,16491,46872,	3	3	4	7	7		9		4	4		2	11			10
hypothetical protein LOC137682,	C8orf38,	IPI00852983,		NP_689629,	Q330K2-1,	AFNVELAQVK, AFPAFLQTVSLEDFLK, DVIYDIASQAHLHLK, VDFDIFHPSLQQK	333	38175.88,	0.162162	9.7933	4	0,	3	6			6	2	5	3	5	2		5	3			2
